# Supplementary material for: In Situ Argon Isotope Analyses of Chondrule-Forming Materials in the Allende Meteorite: A Preliminary Study for 40Ar/39Ar Dating Based on Cosmogenic 39Ar
Source: MDPI journal article supplement (doi:10.3390/min13010031), 2022-12-25

### **Supplementary Figure S1**

Back-scattered electron (BSE) images of the 37 small fragments of the chondrules and CAIs

**BOC-01**

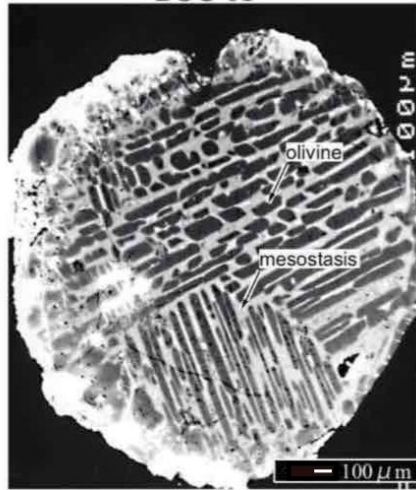

**BOC-02**

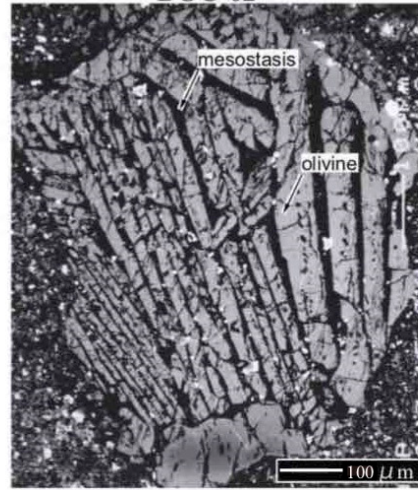

**BOC-03**

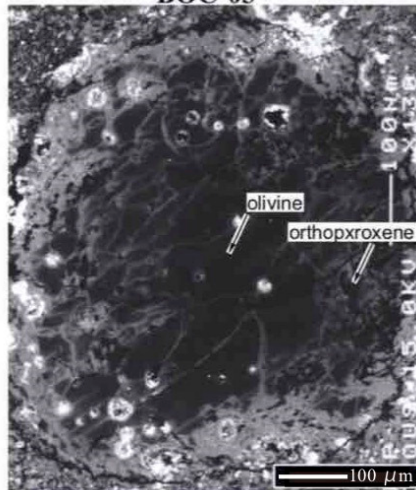

**BOC-04**

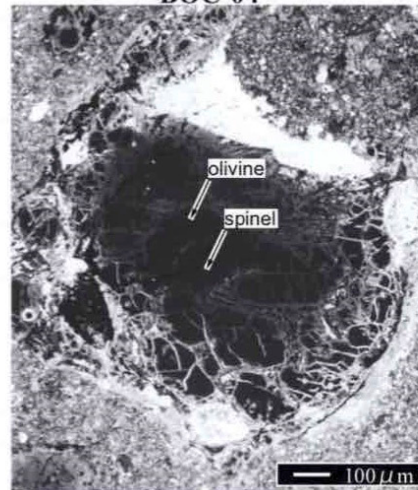

**BOC-05**

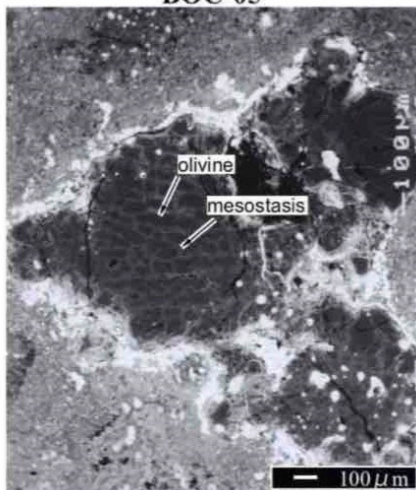

**BOC-06**

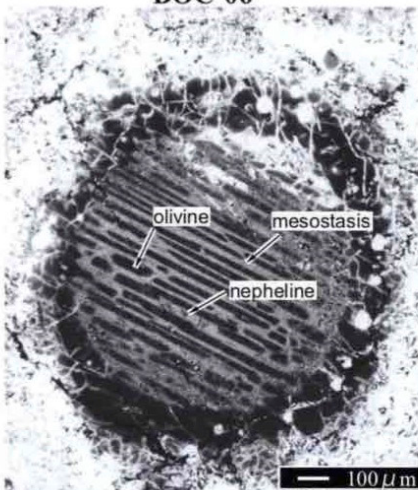

**BOC-07**

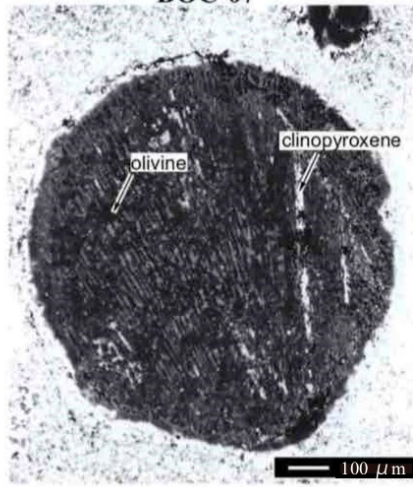

**BOC-08**

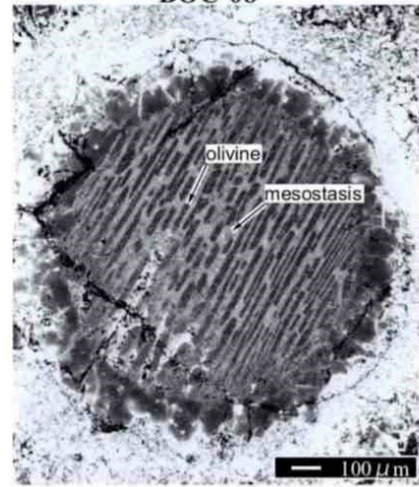

**BOC-09**

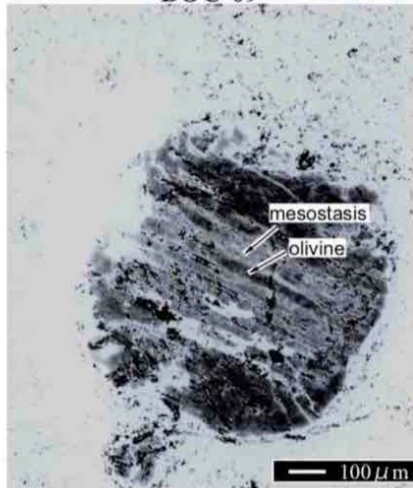

**BOC-10**

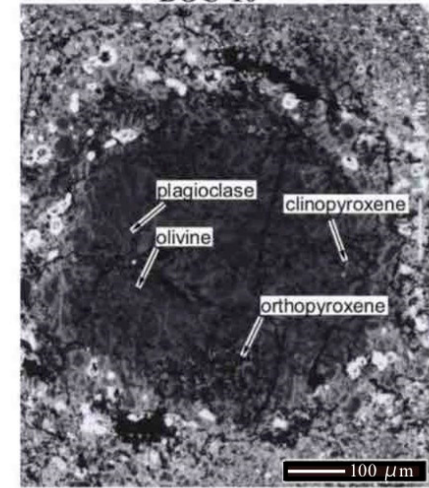

**BOC-11a**

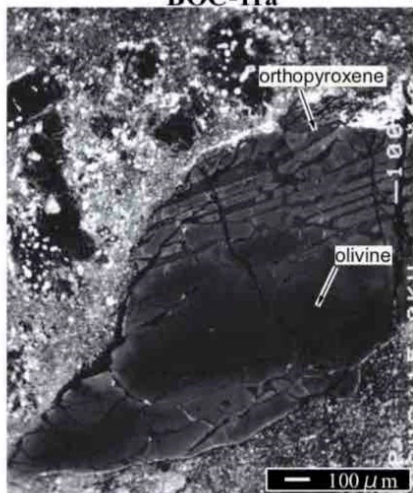

**BOC-11b**

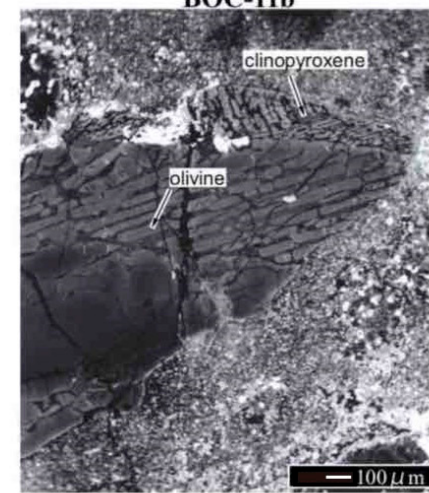

**POC-01**

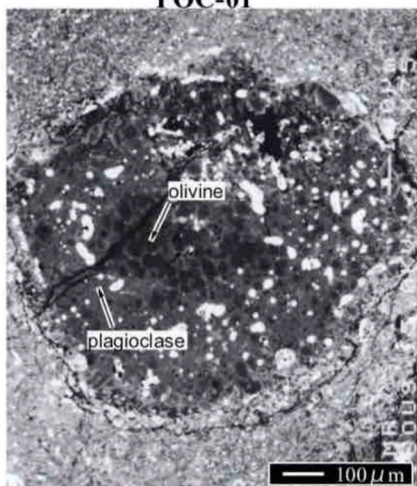

**POC-02**

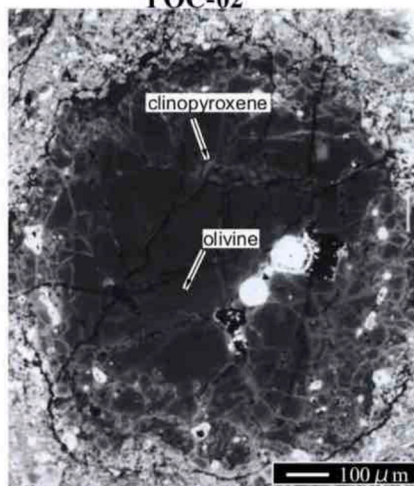

**POC-03**

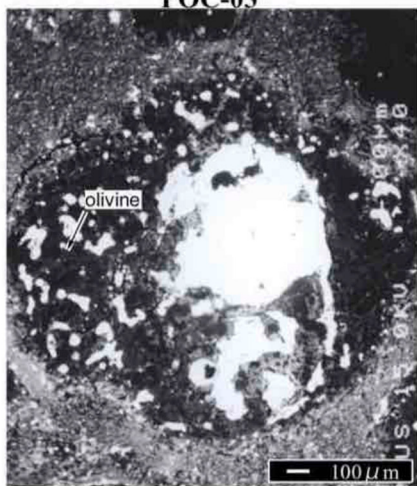

**POC-04**

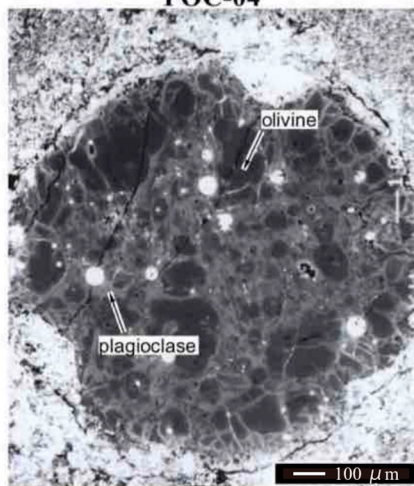

**POC-05**

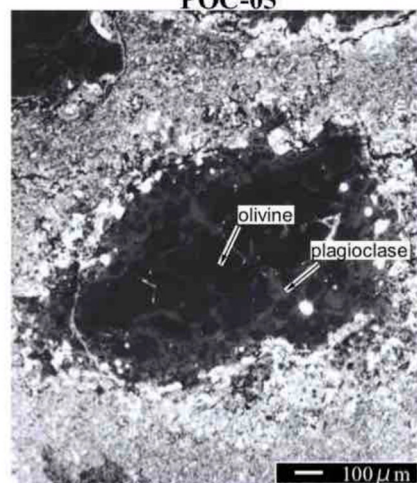

**POC-06**

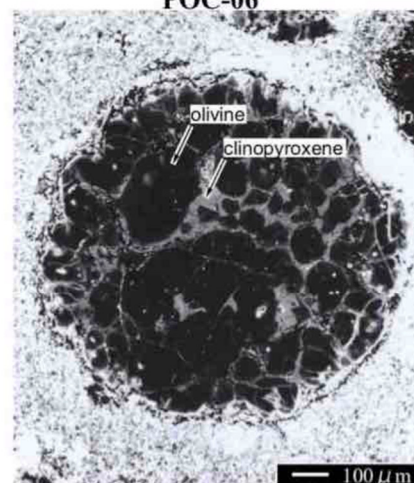

POC-07a

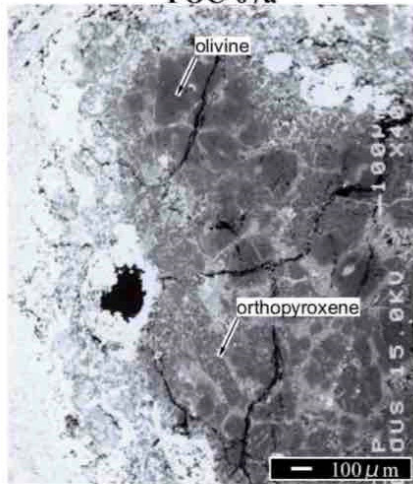

POC-07b

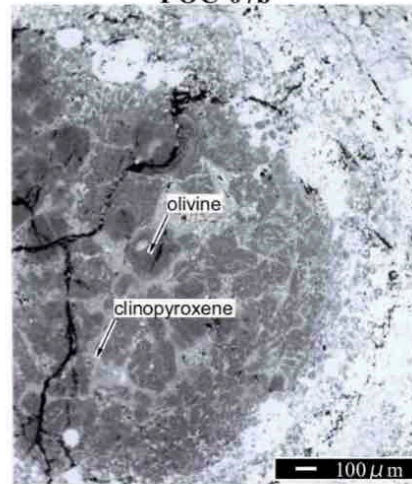

POC-08

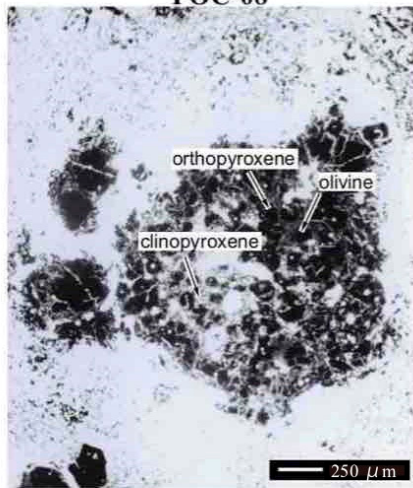

POC-09

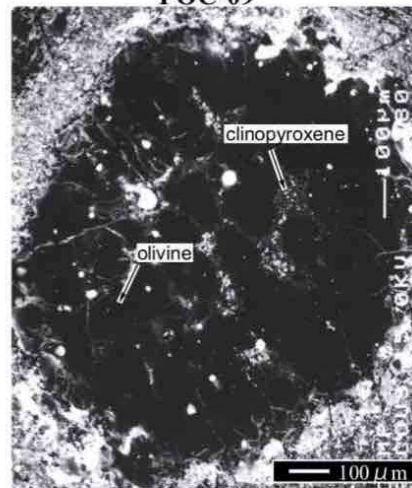

POC-10

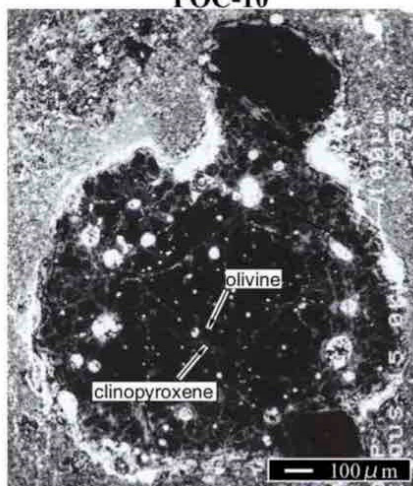

POC-11

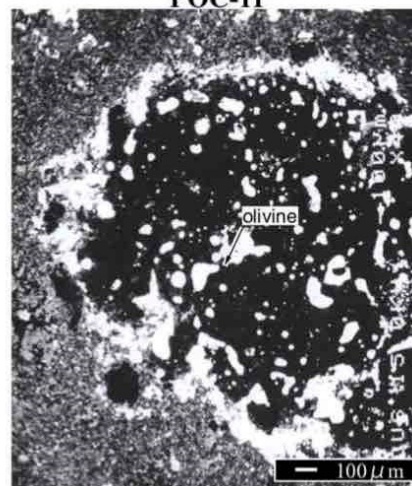

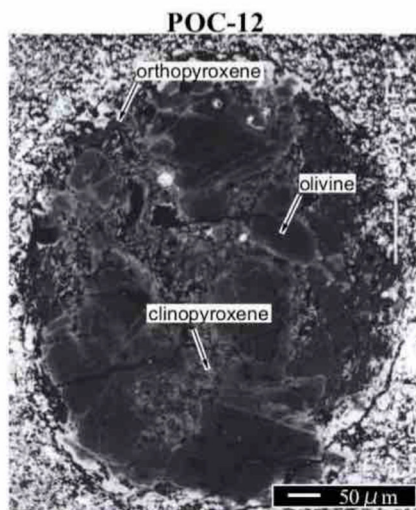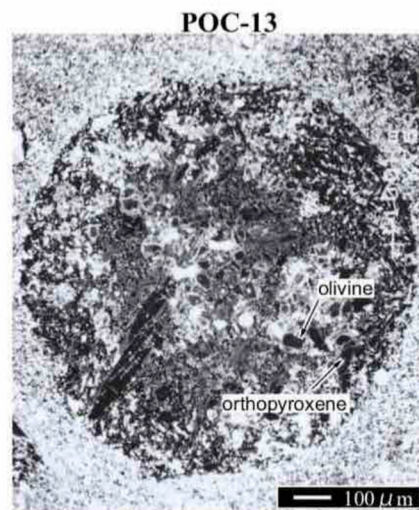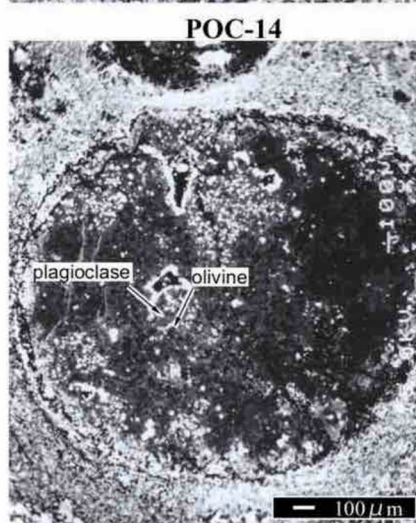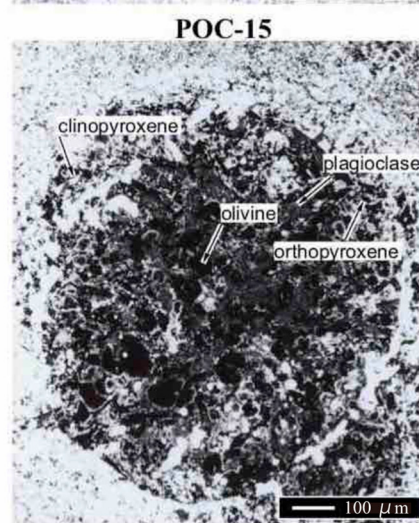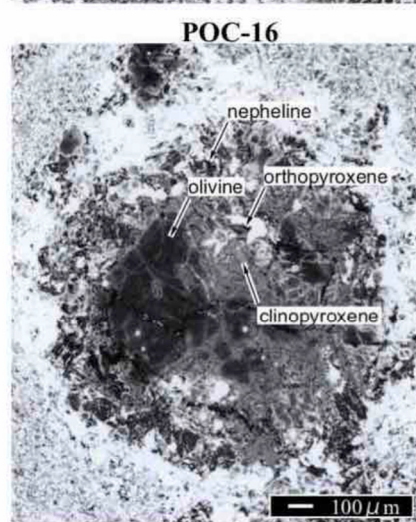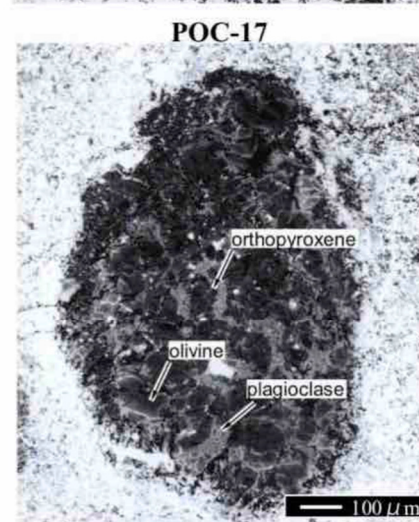

**POC-18**

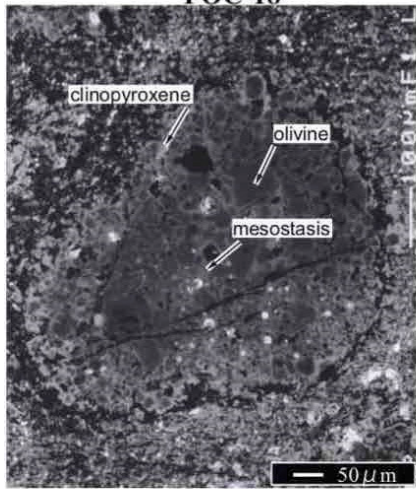

**POC-19**

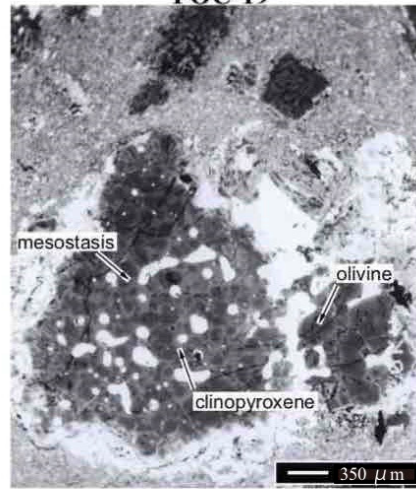

**UC-01**

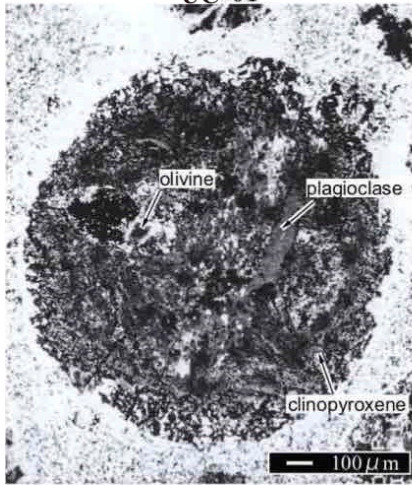

**UC-02**

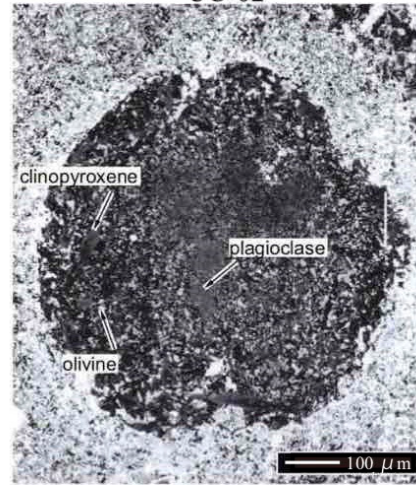

**UC-03**

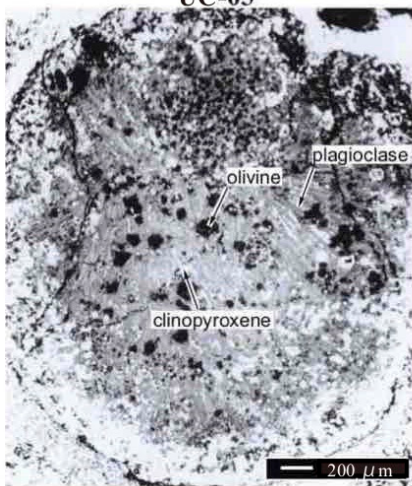

**OF-01**

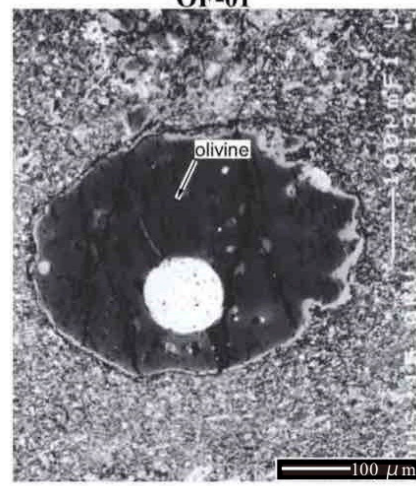

OF-02

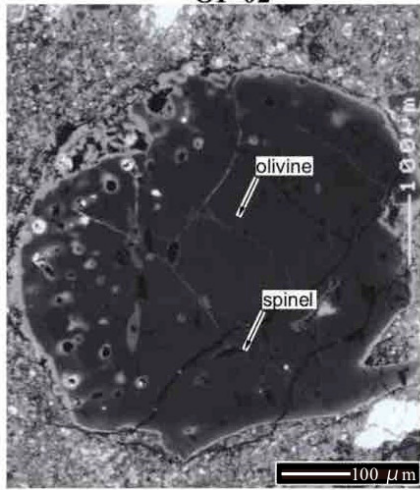

CAI-01

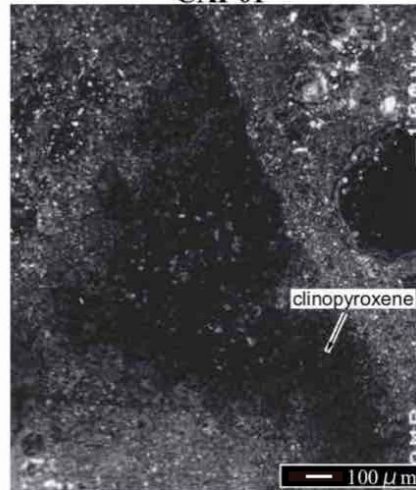

CAI-02

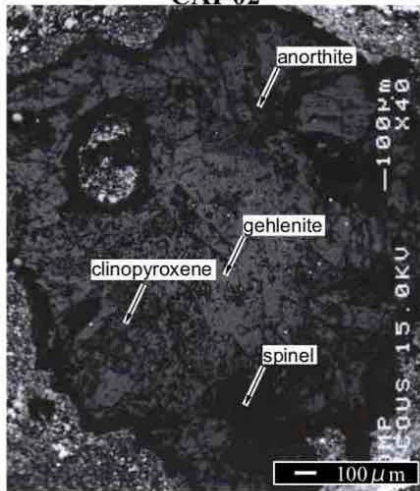

Supplement: s1 [file s1 › SF1.pdf]
