# Supplementary material for: In Situ Argon Isotope Analyses of Chondrule-Forming Materials in the Allende Meteorite: A Preliminary Study for 40Ar/39Ar Dating Based on Cosmogenic 39Ar
Source: MDPI journal article supplement (doi:10.3390/min13010031), 2022-12-25

### **Supplementary Figure S2**

Compositional map (CM) of the 37 fragments of the chondrules and CAIs  
X-ray images of  $\text{SiK}\alpha$ ,  $\text{AlK}\alpha$ ,  $\text{MgK}\alpha$ ,  $\text{FeK}\alpha$ ,  $\text{CaK}\alpha$ ,  $\text{NaK}\alpha$ ,  $\text{KK}\alpha$  and  $\text{ClK}\alpha$

**BOC-01**

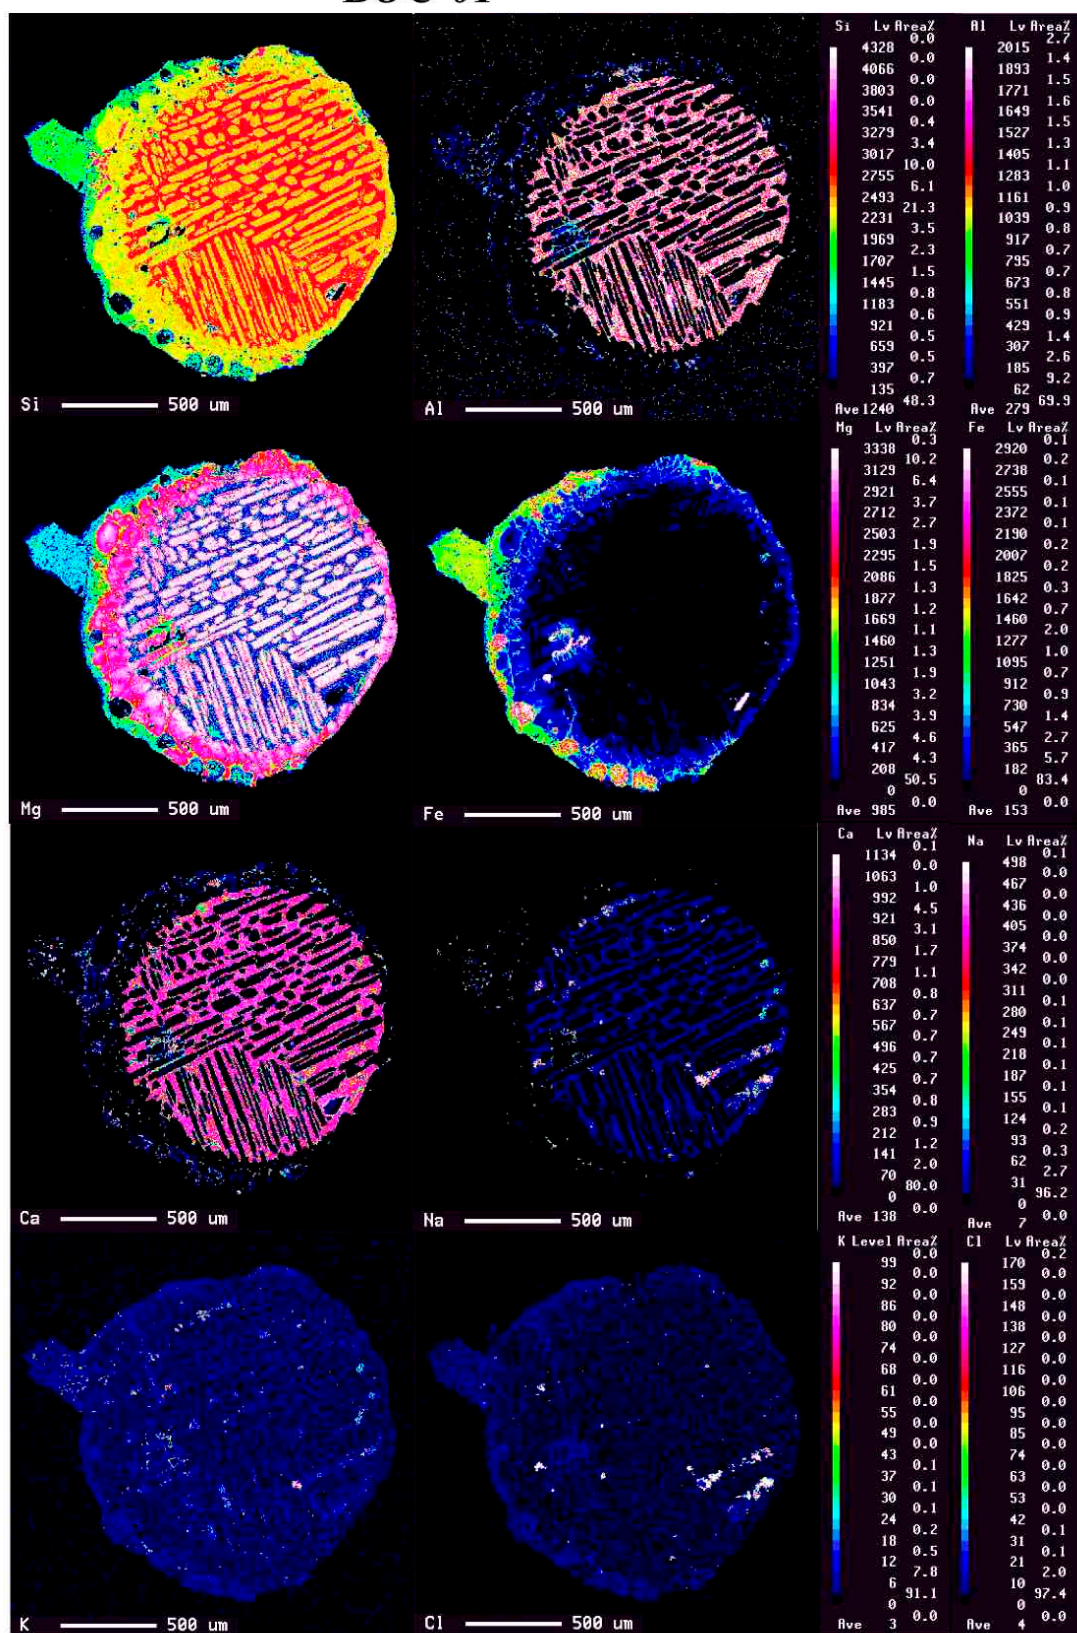

## BOC-02

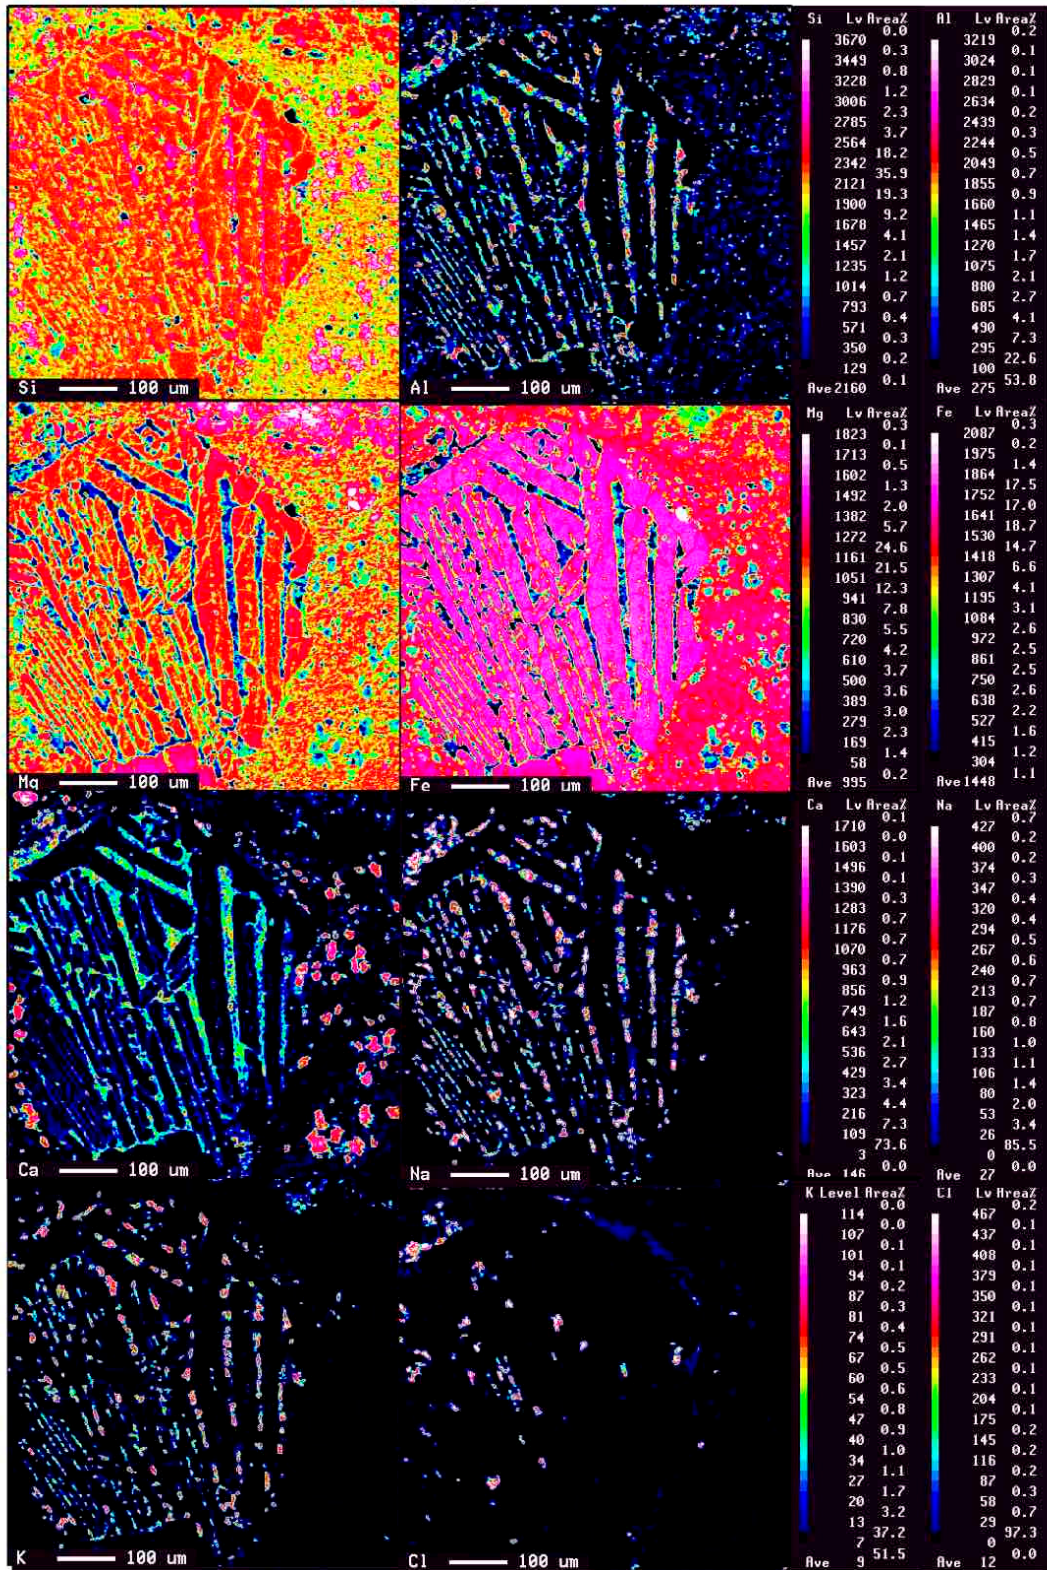

# BOC-03

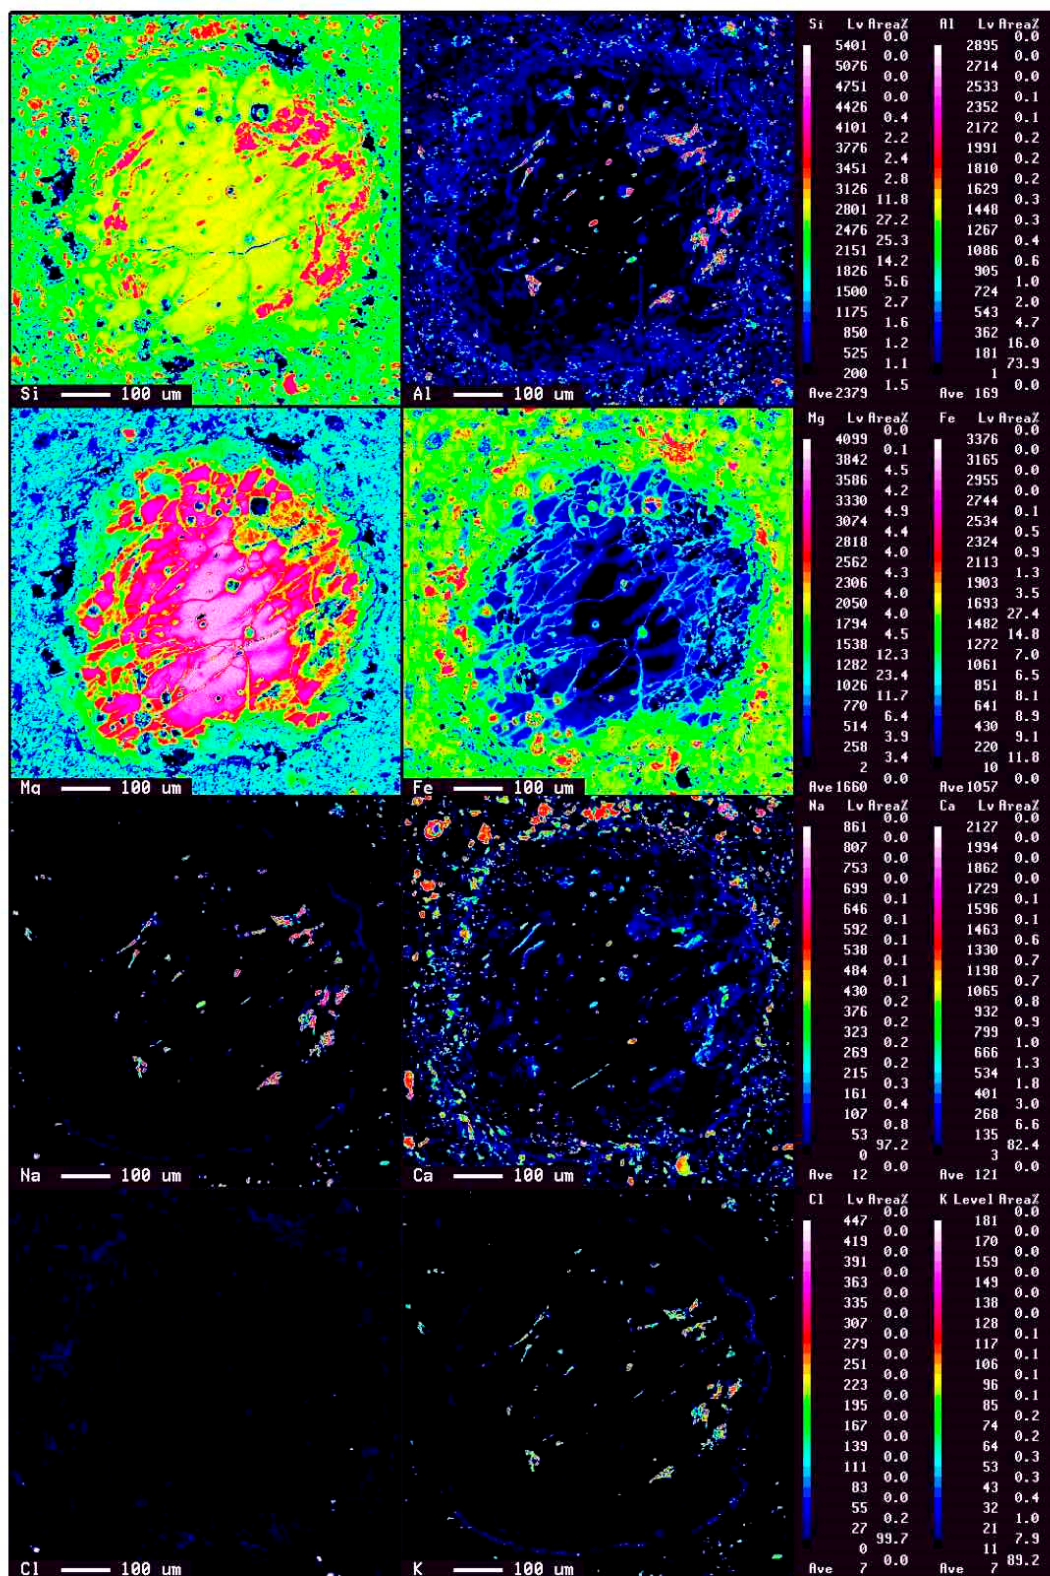

# BOC-04

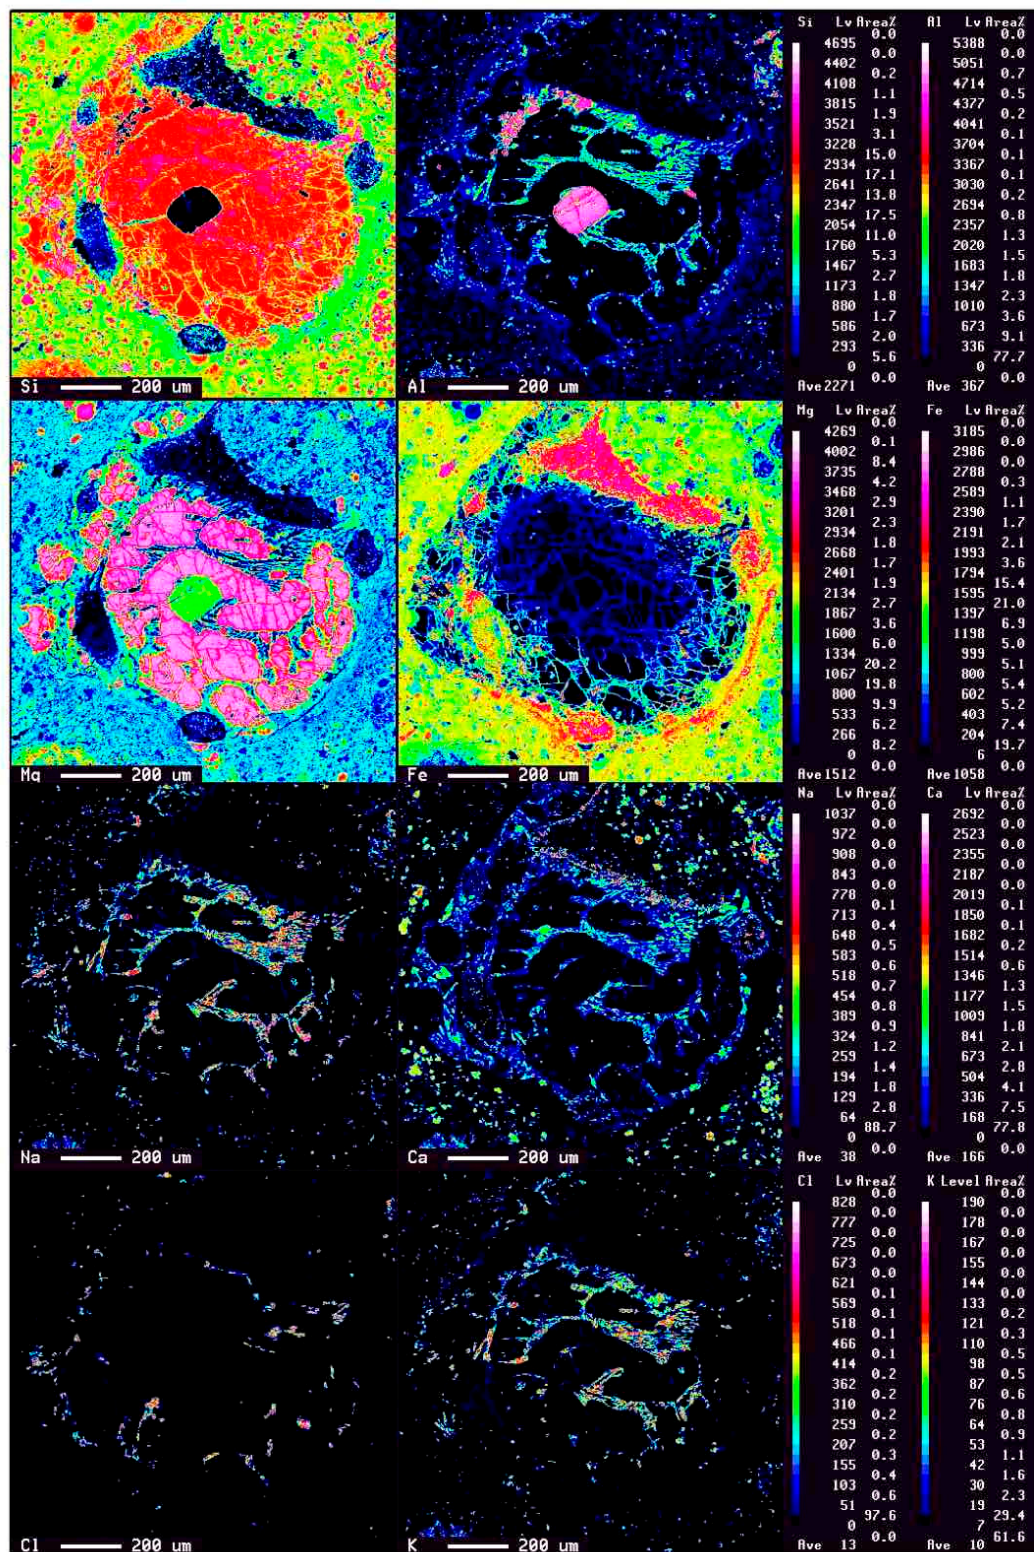

# BOC-05

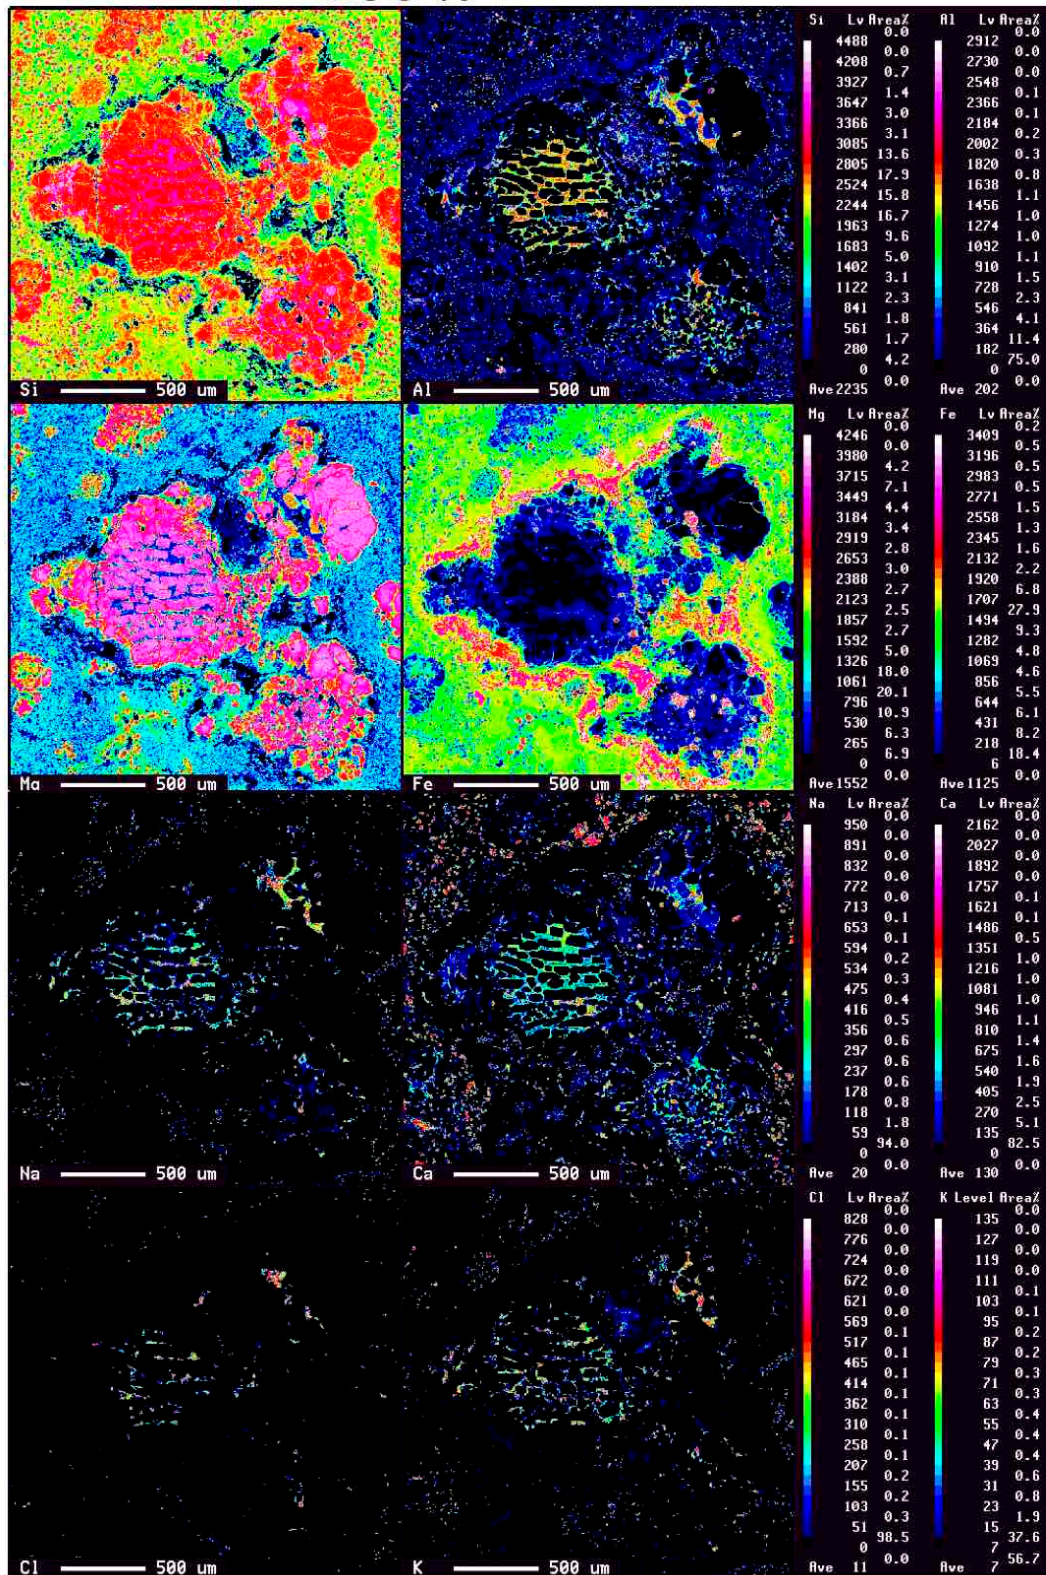

# BOC-06

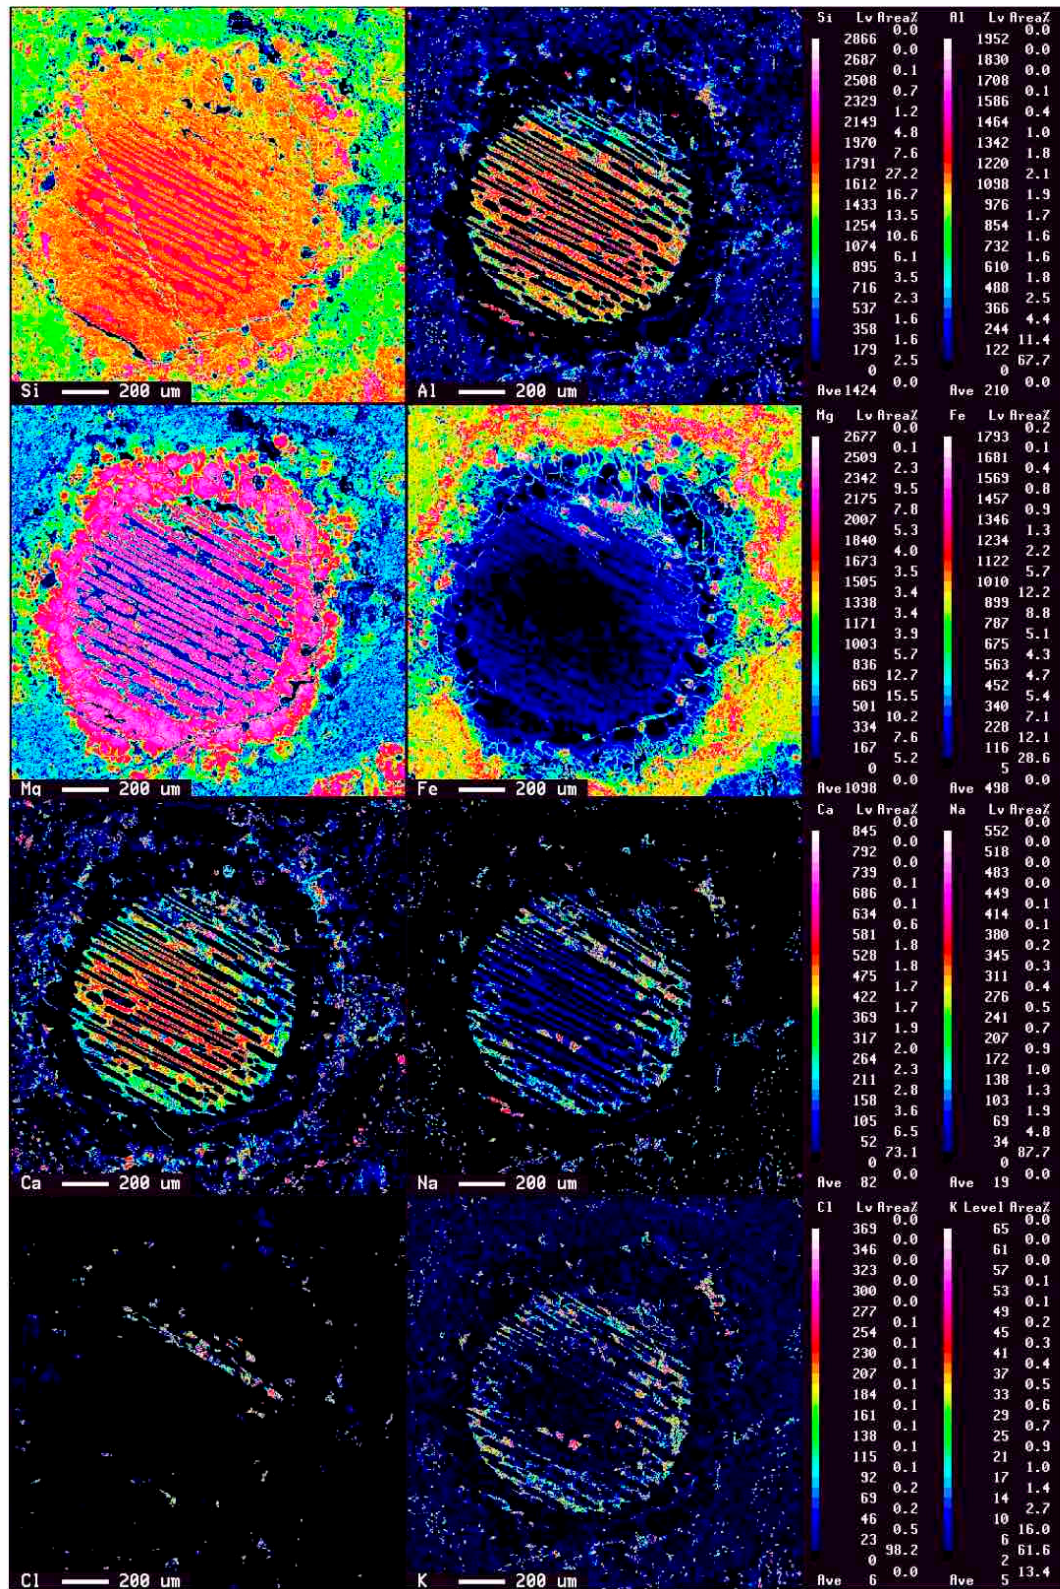

# BOC-07

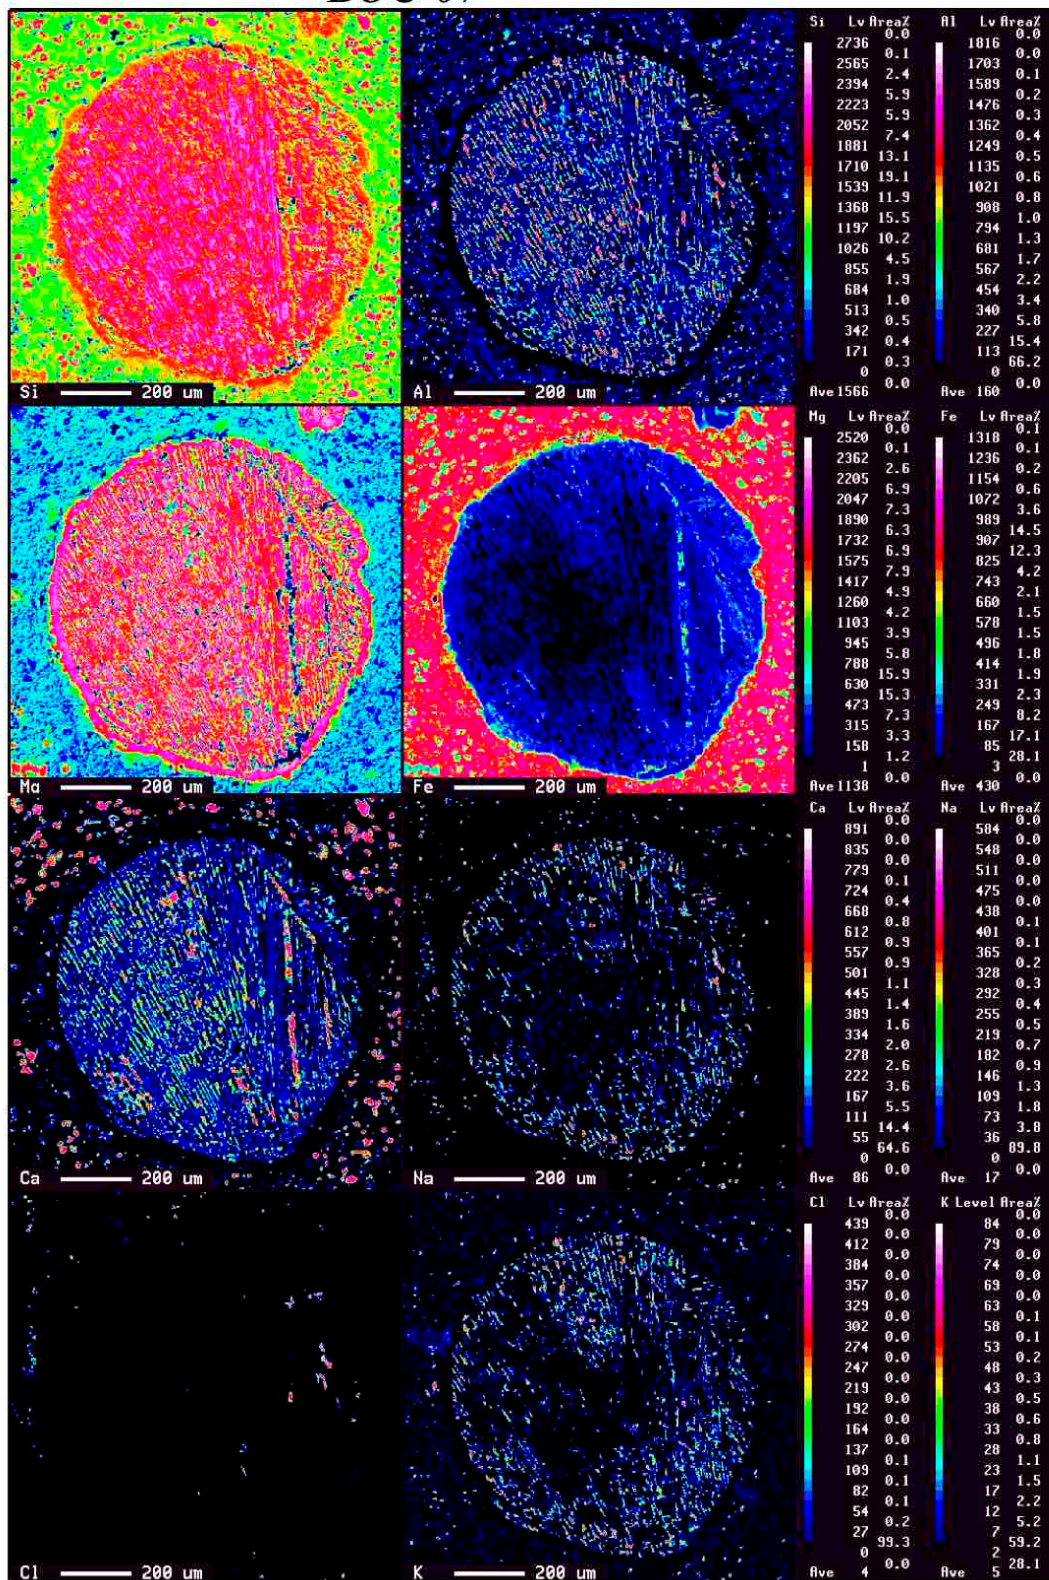

# BOC-08

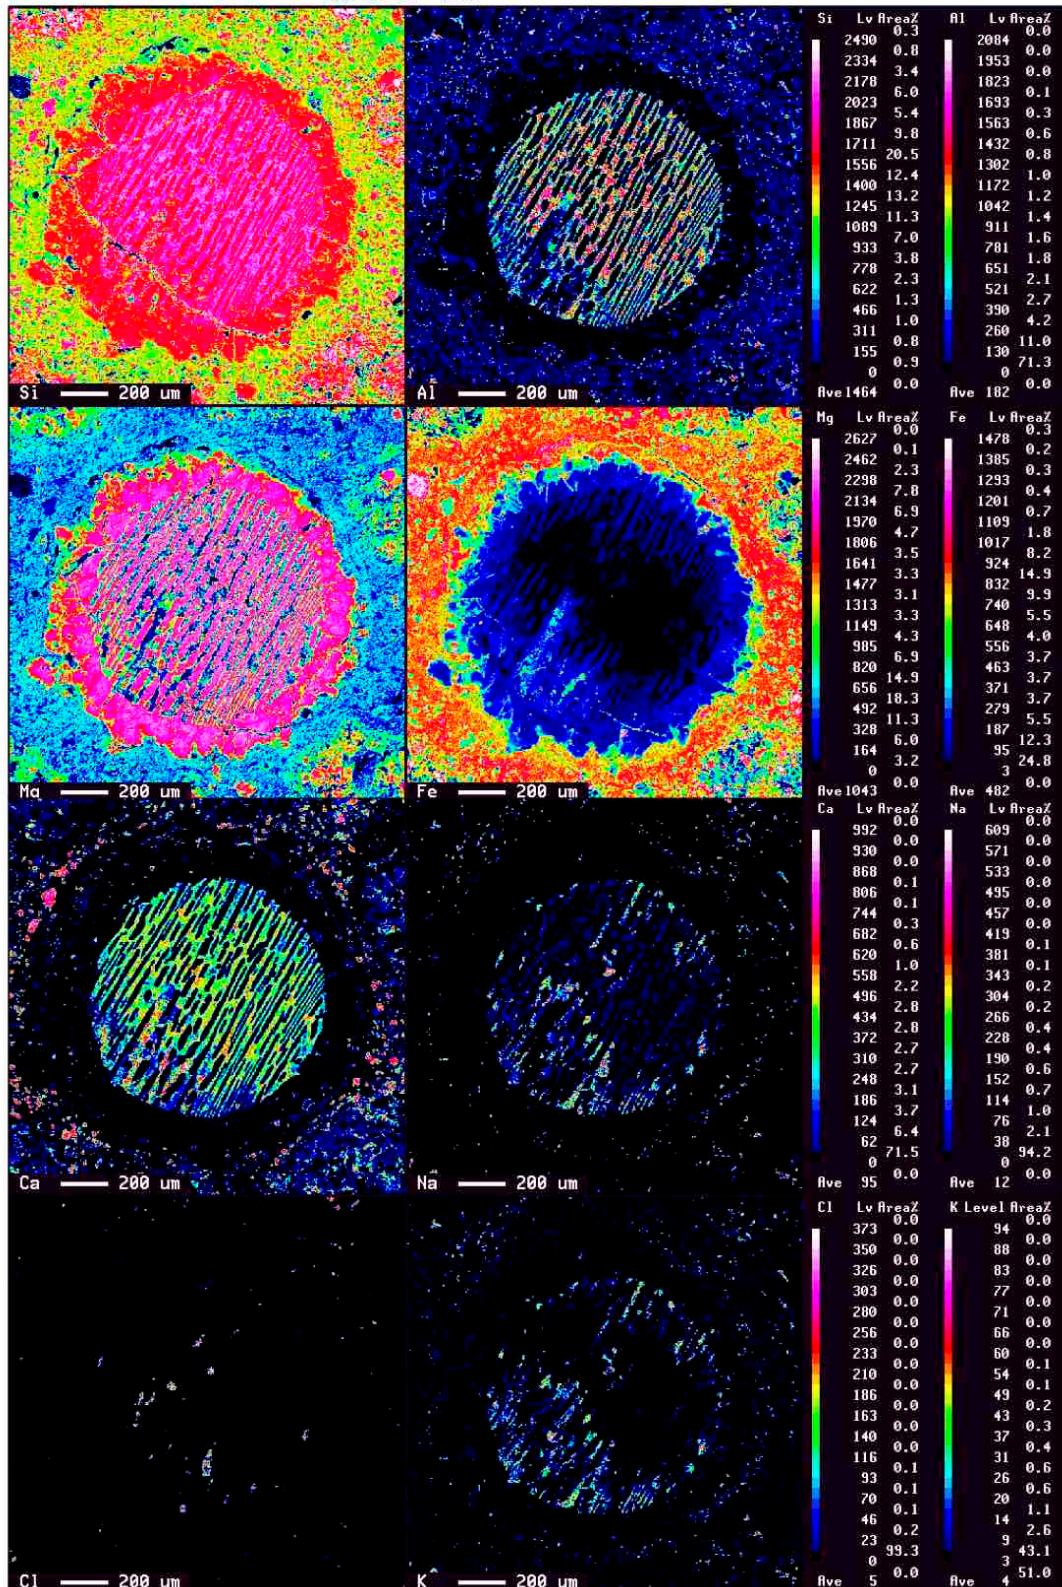

# BOC-09

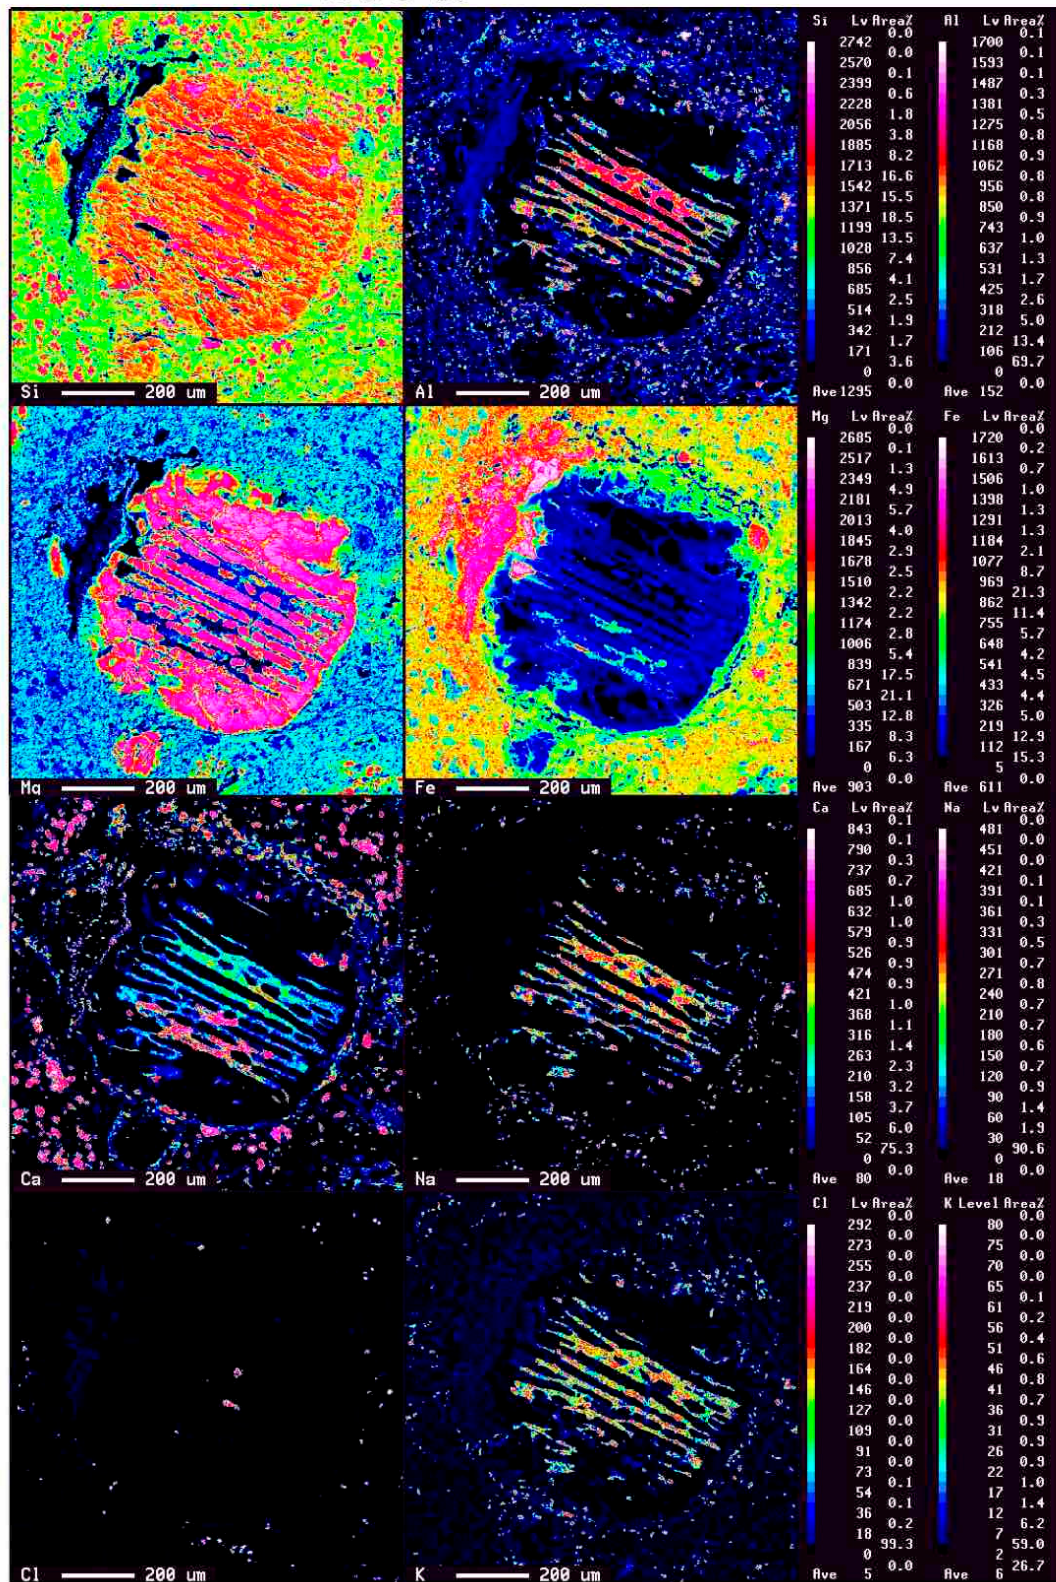

# BOC-10

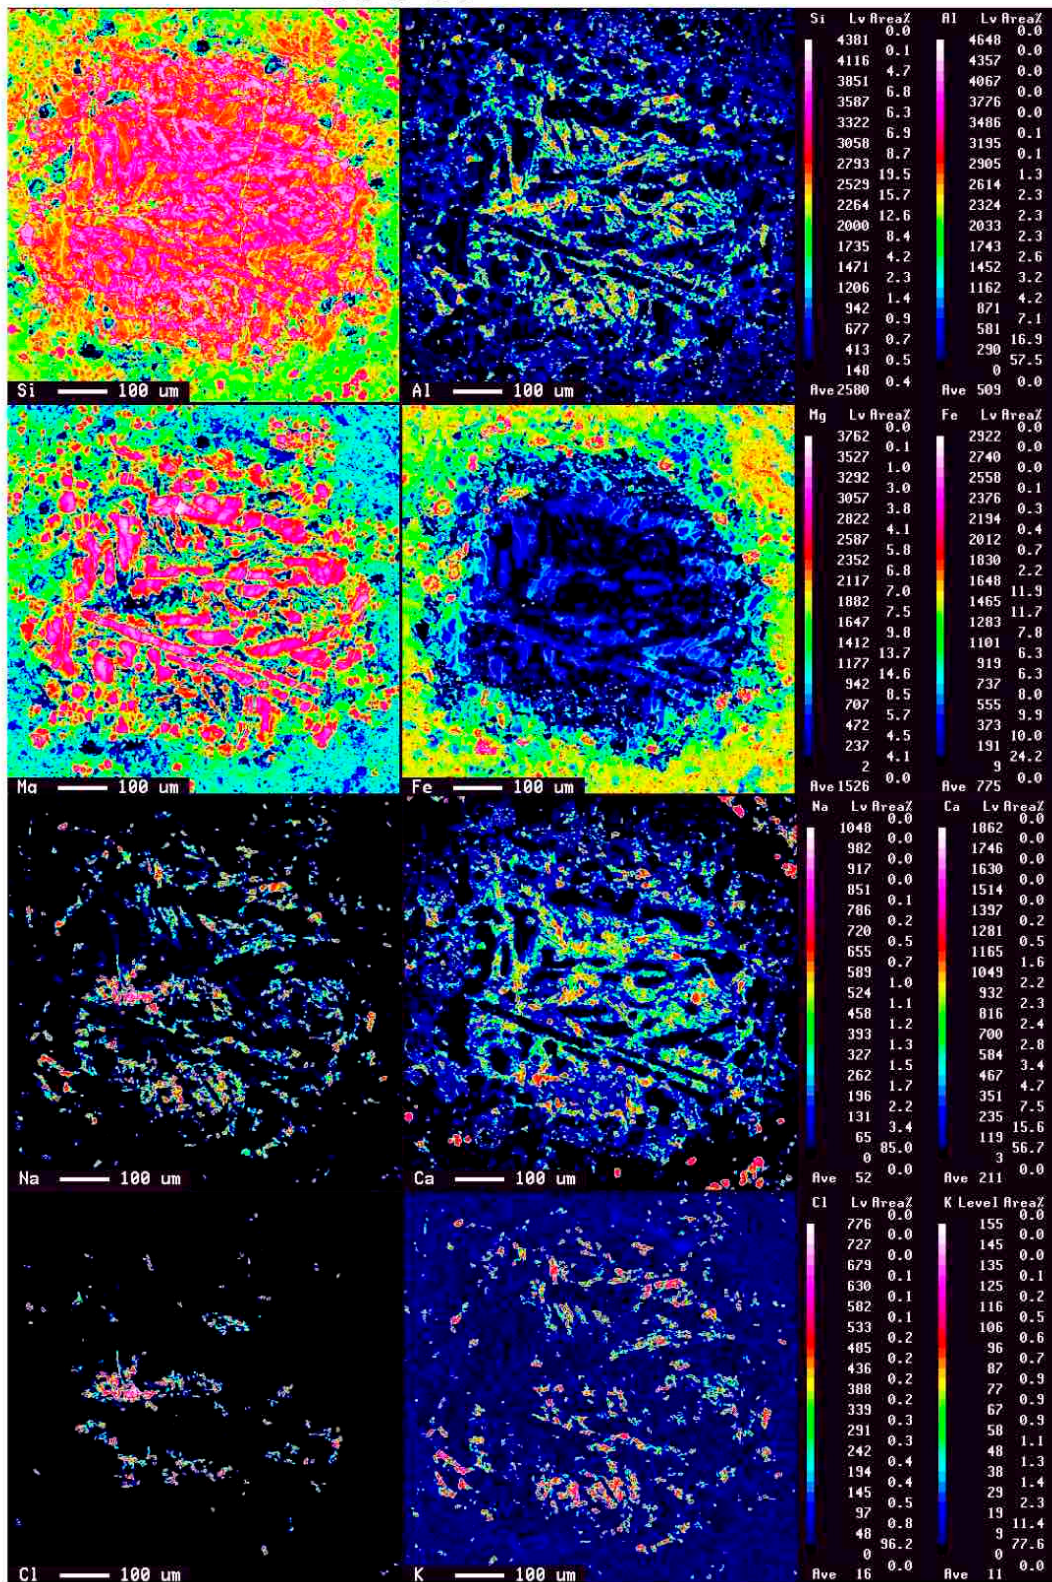

# BOC-11

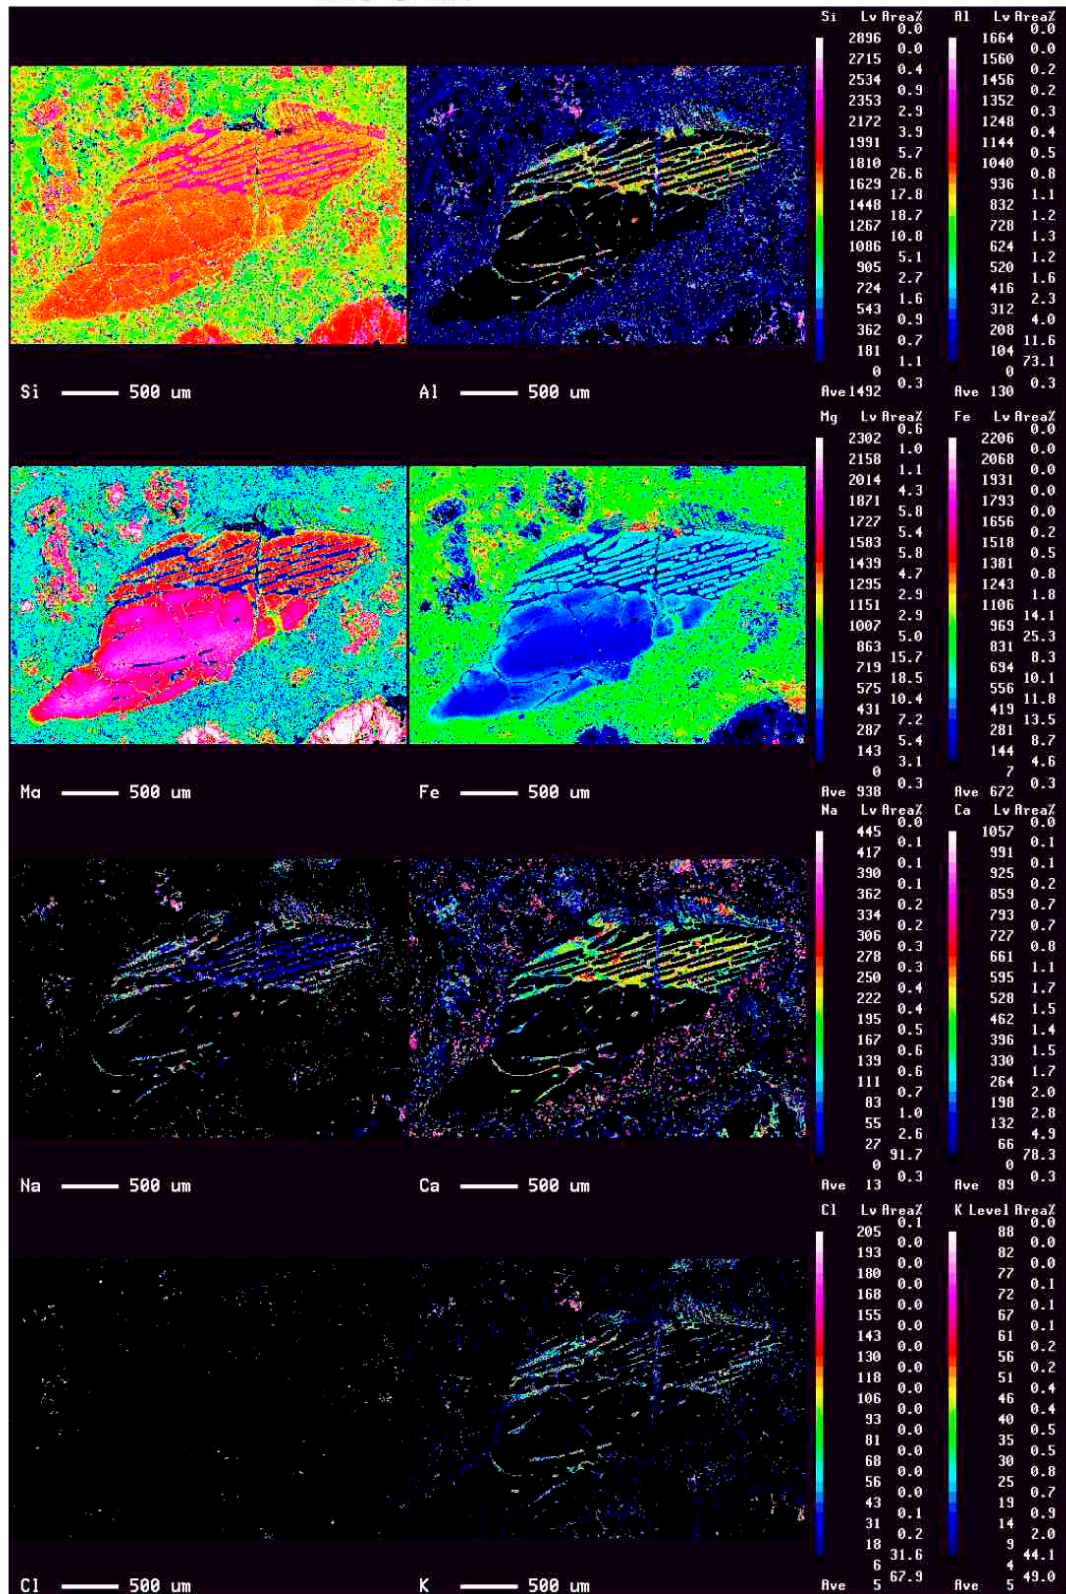

# POC-01

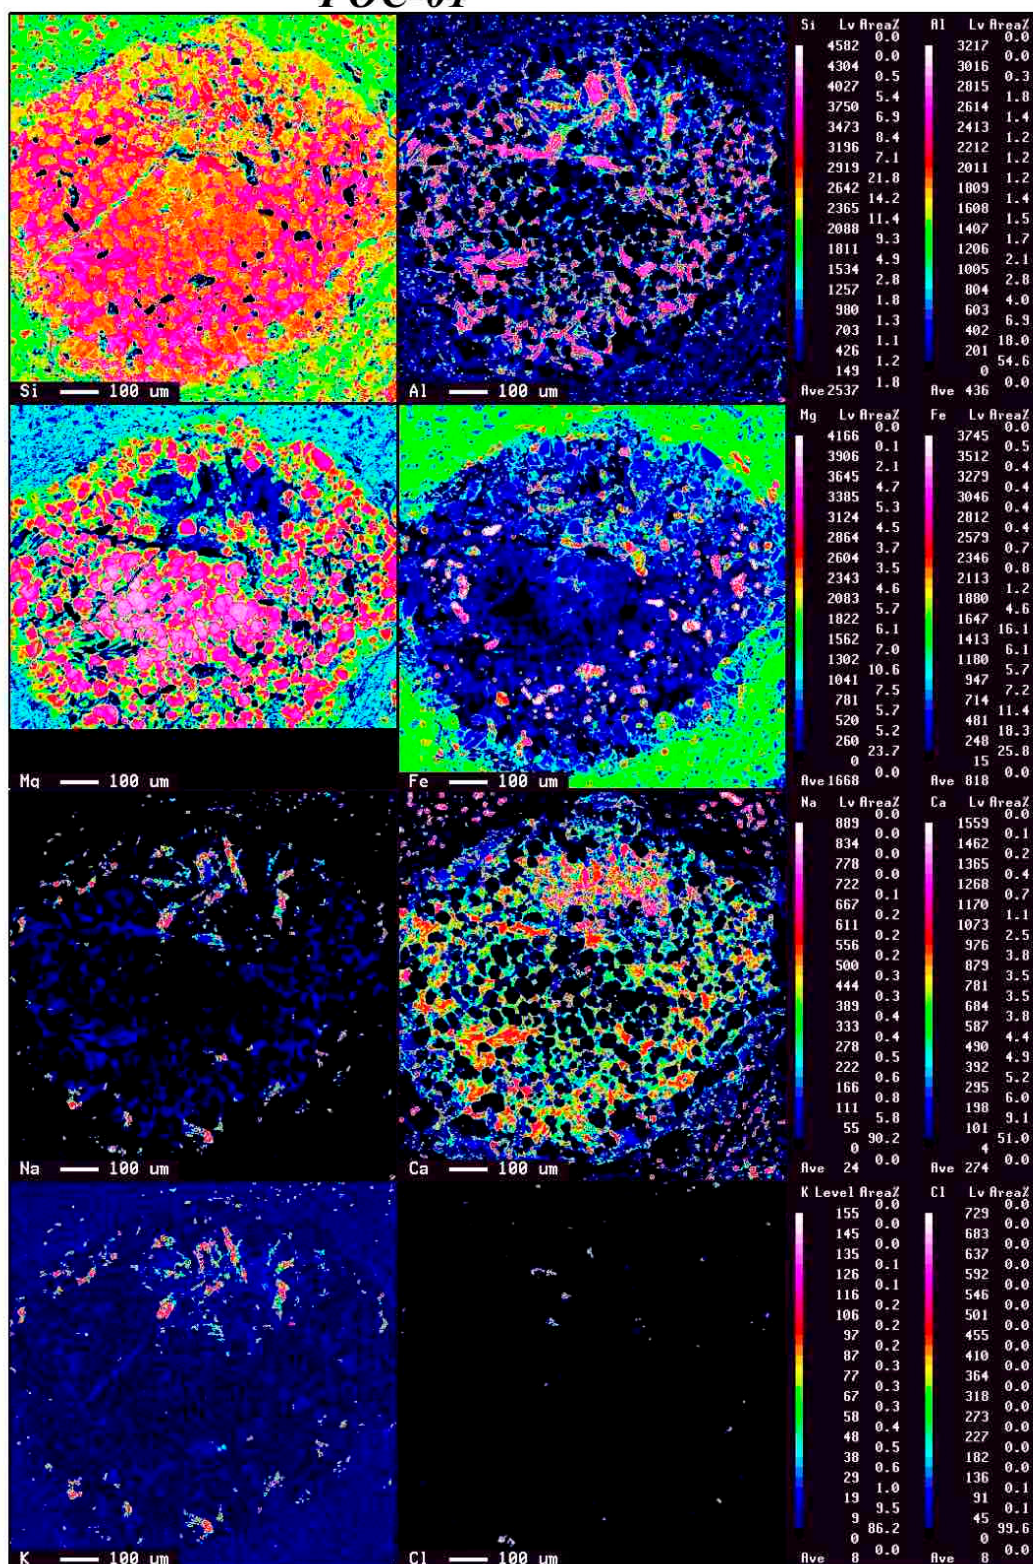

# POC-02

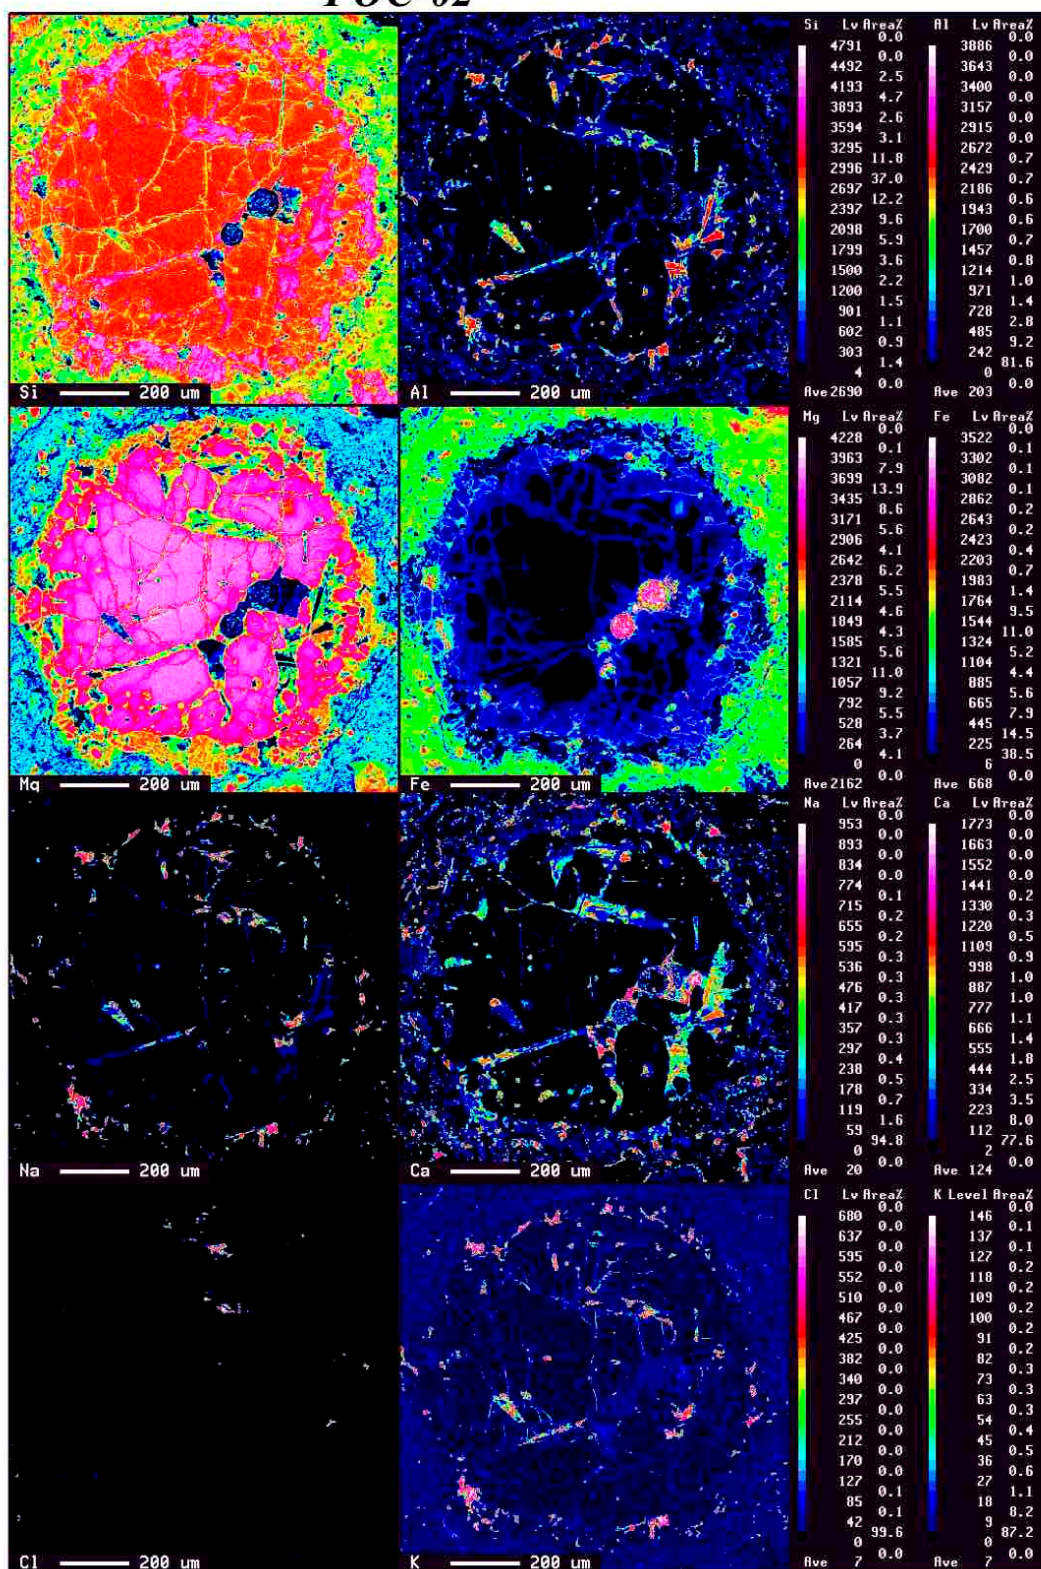

# POC-03

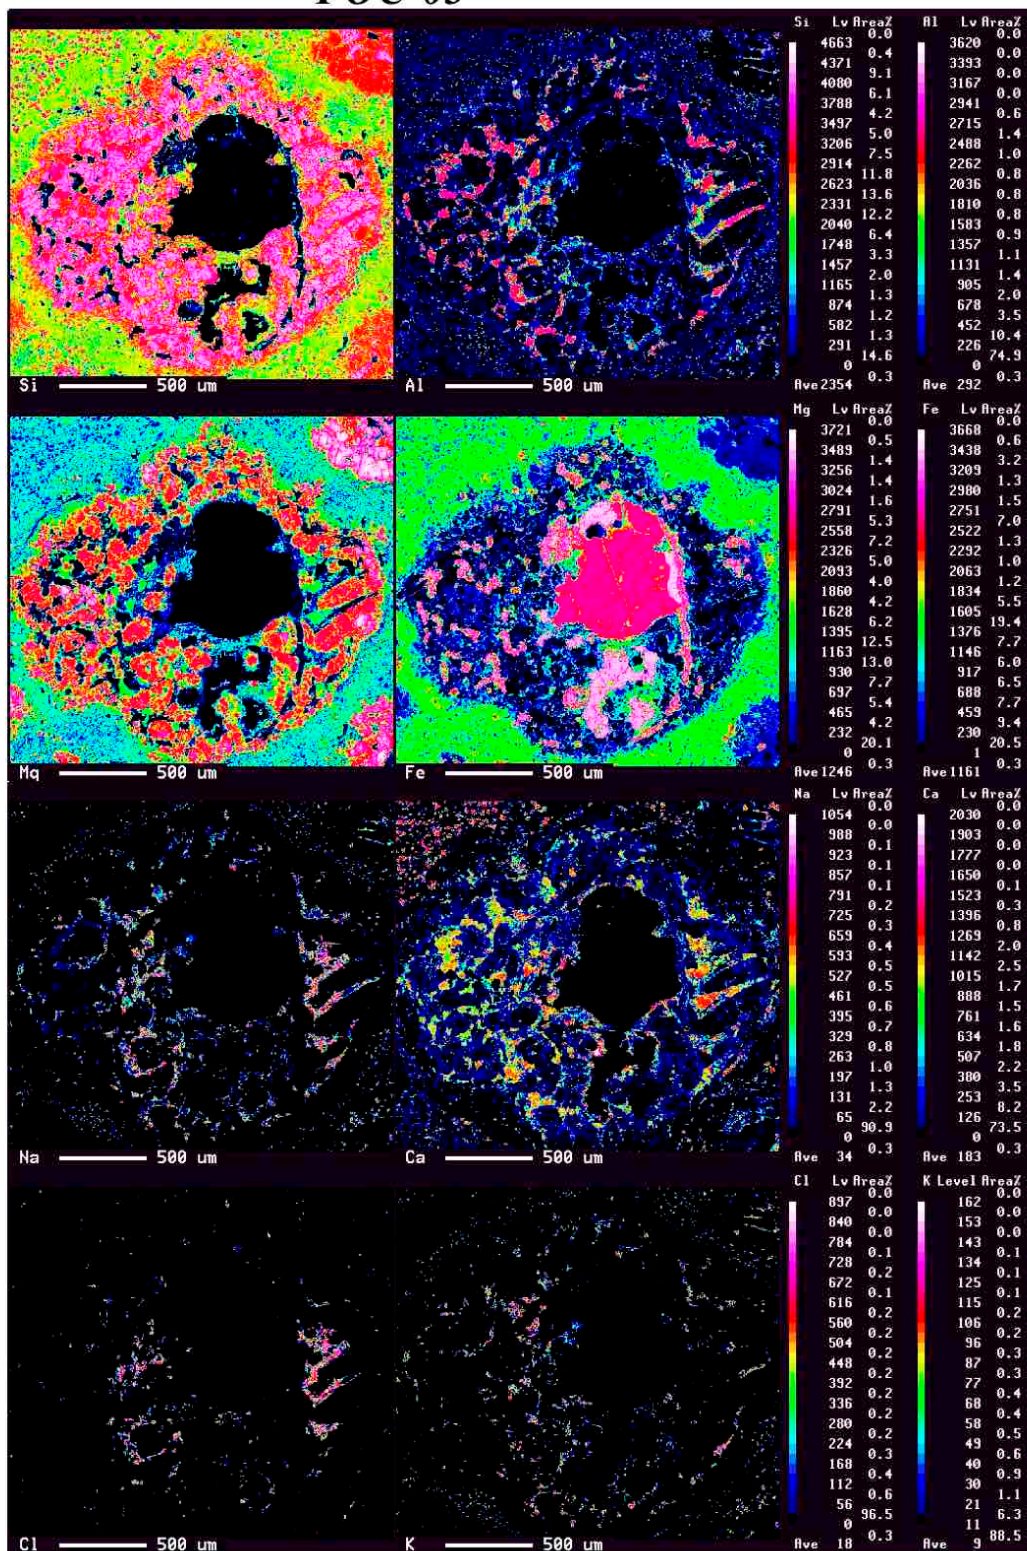

# POC-04

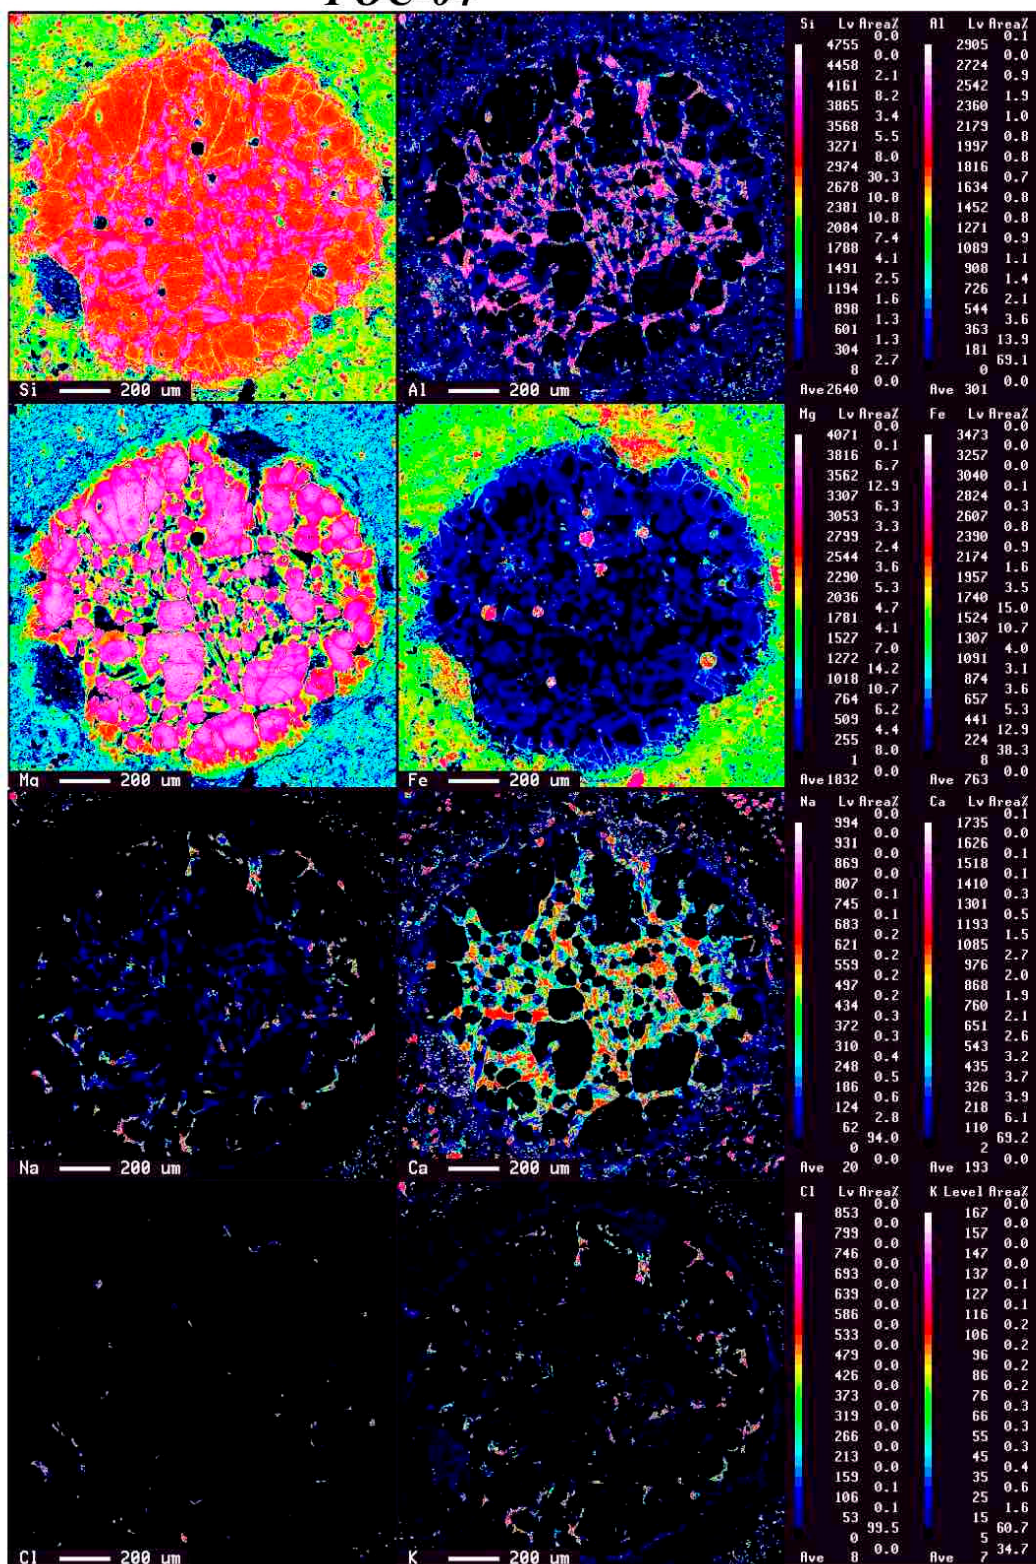

# POC-05

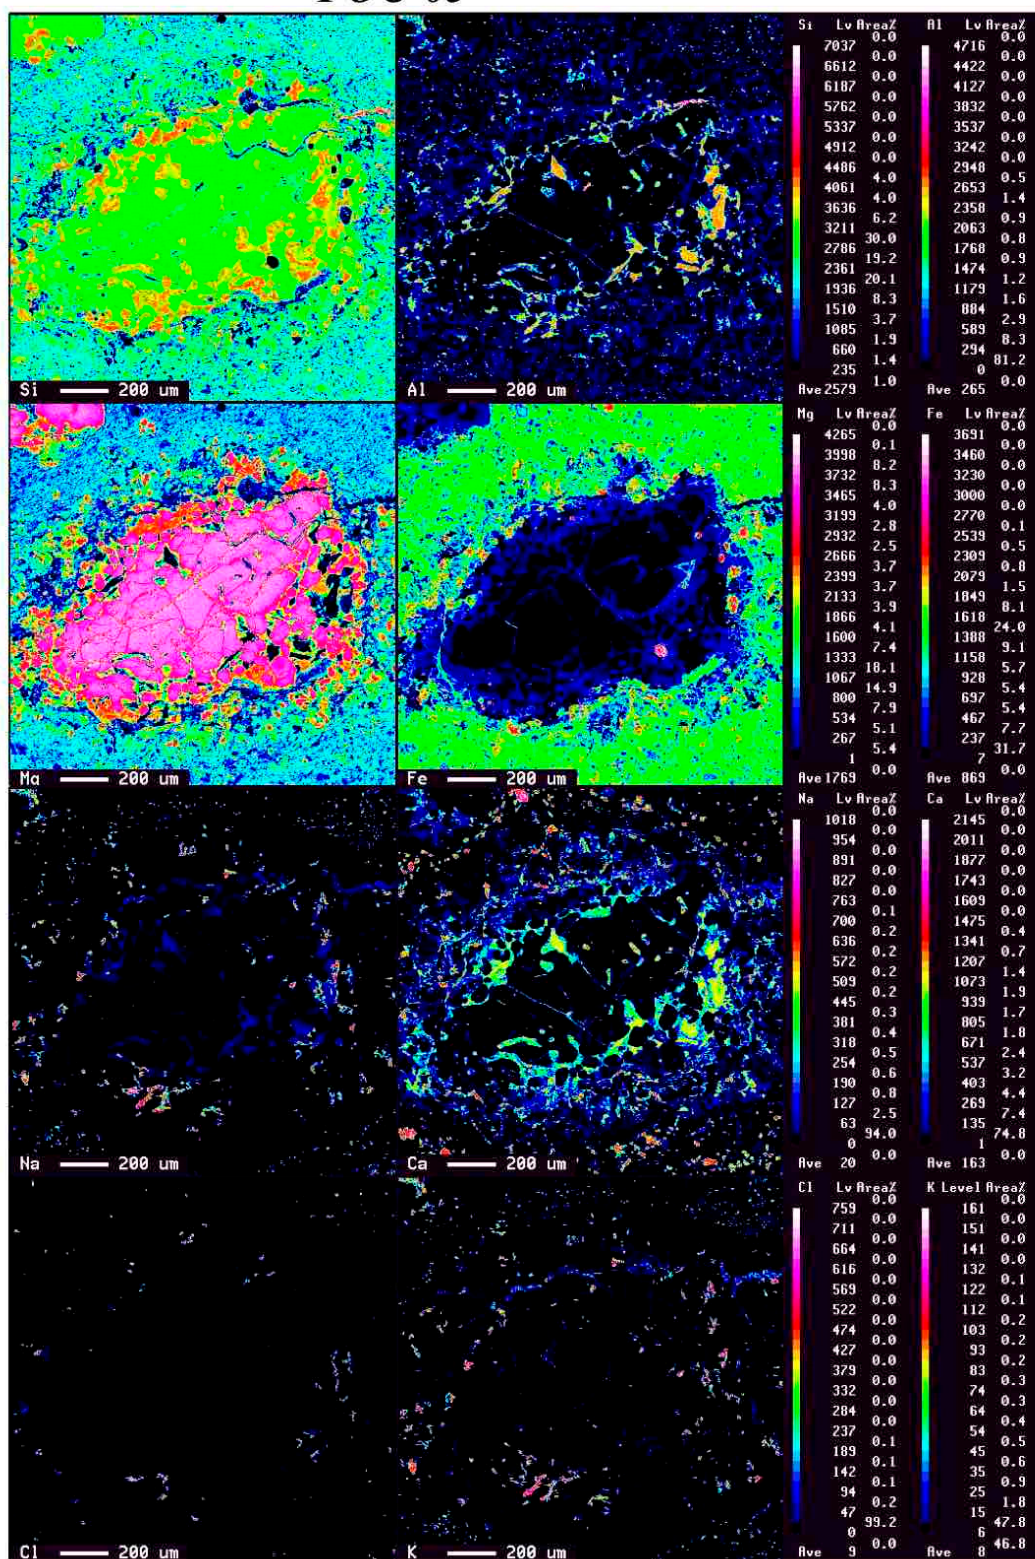

# POC-06

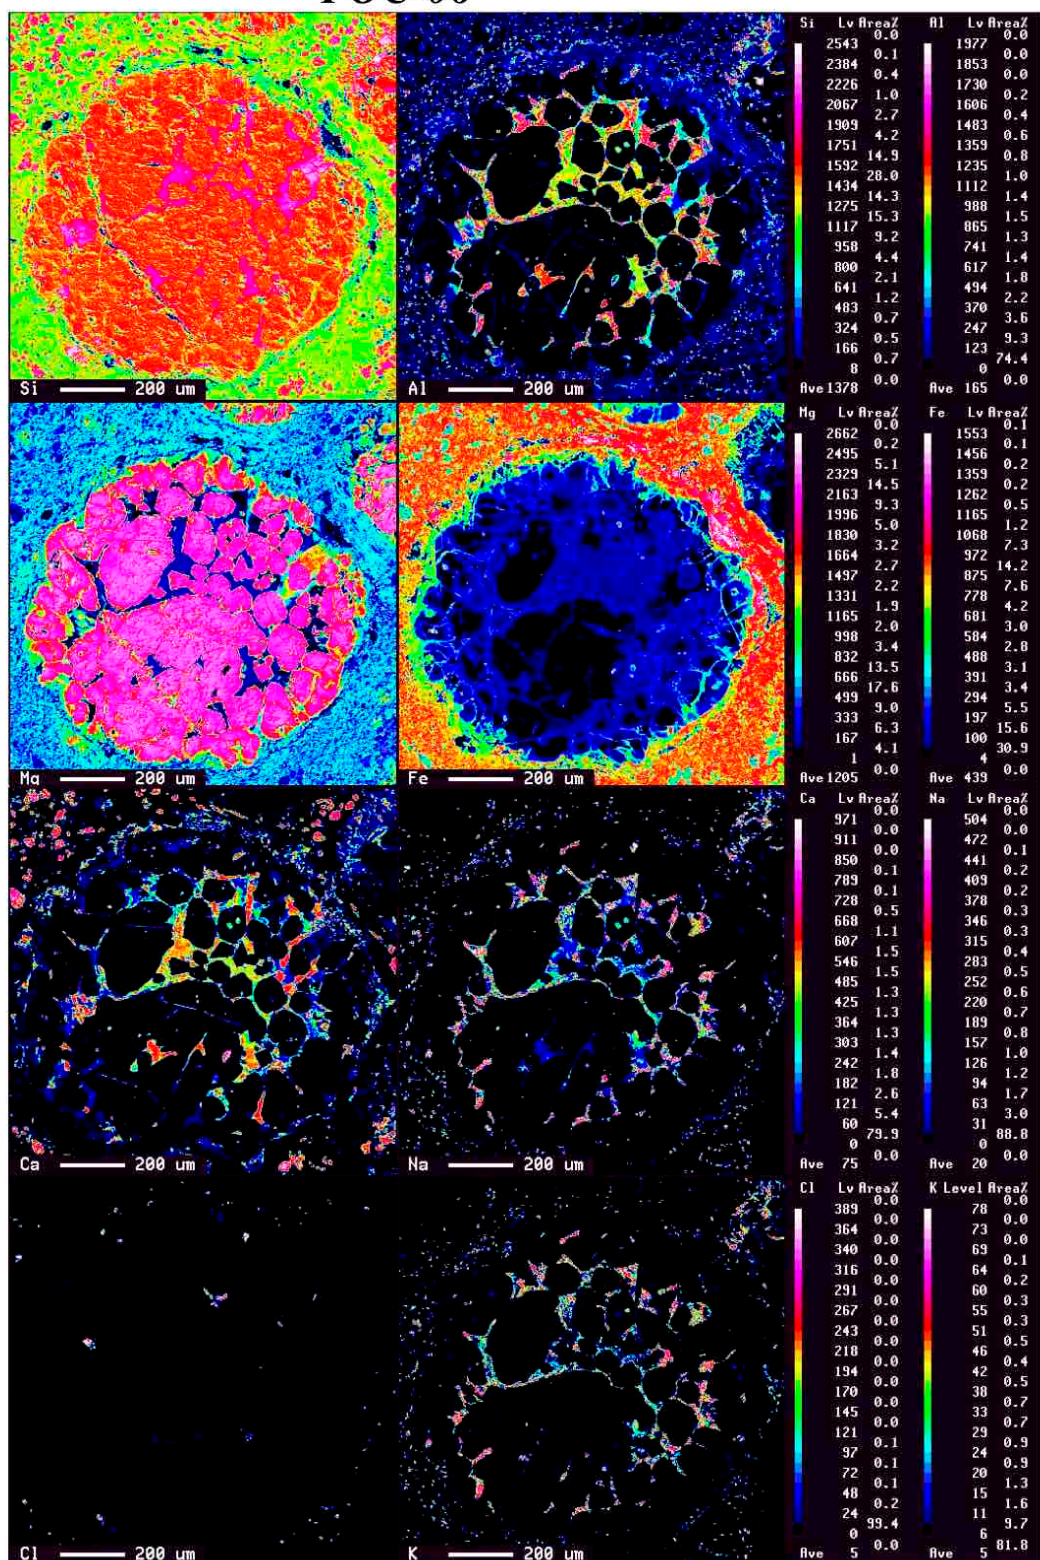

# POC-07

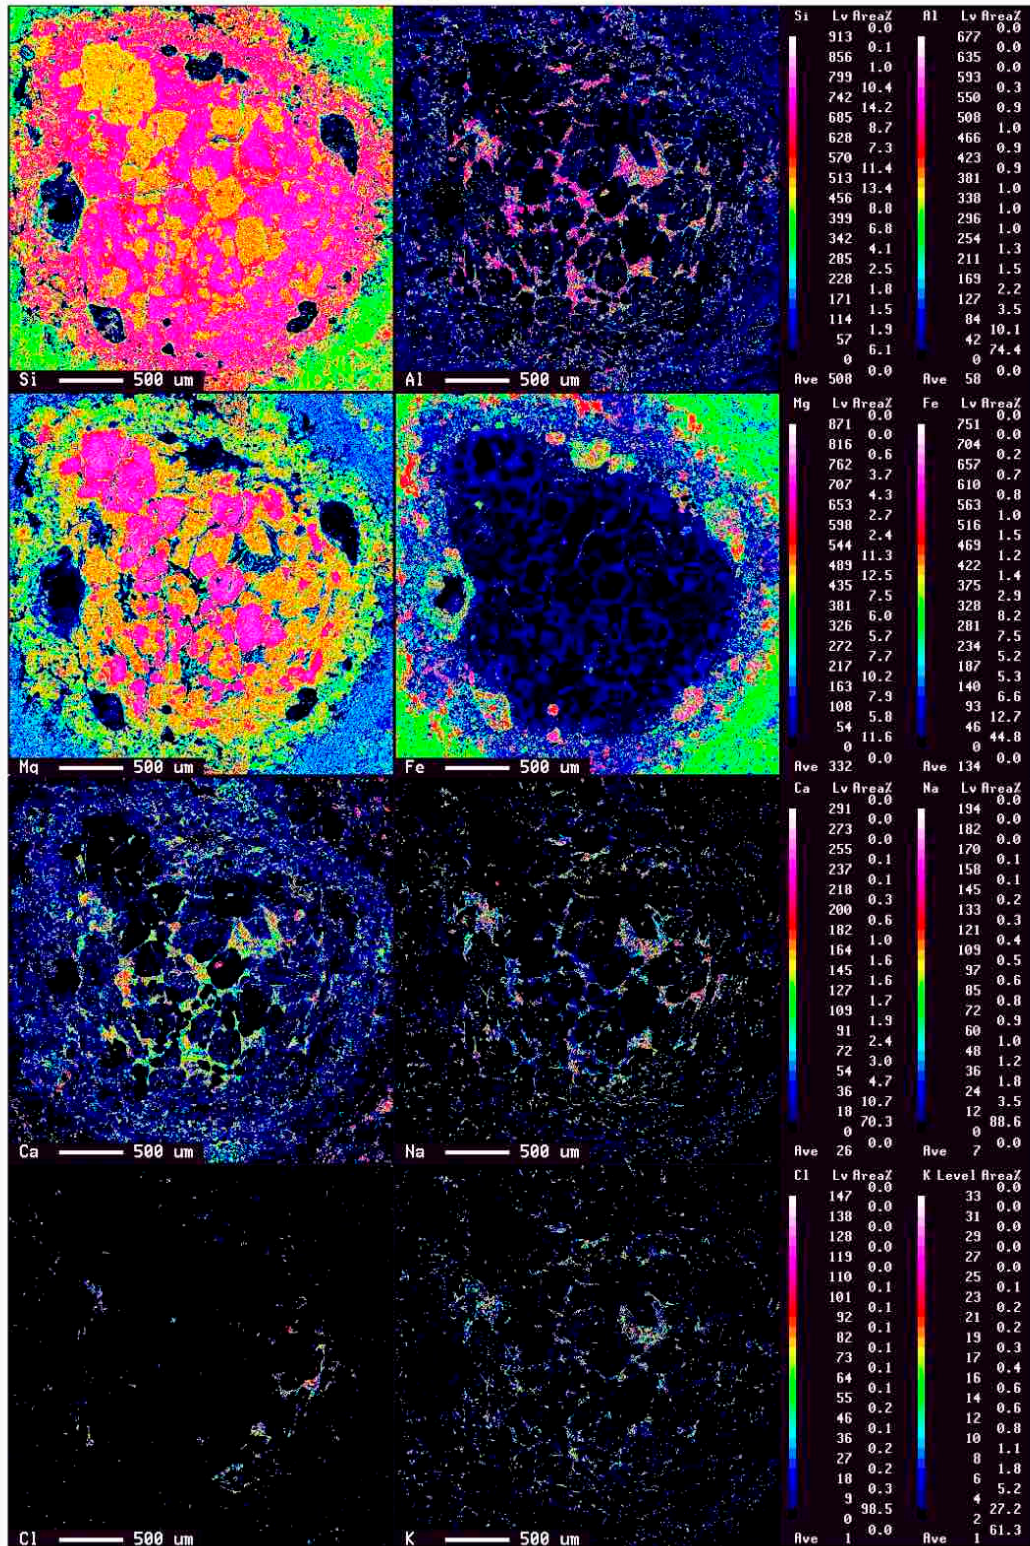

# POC-08

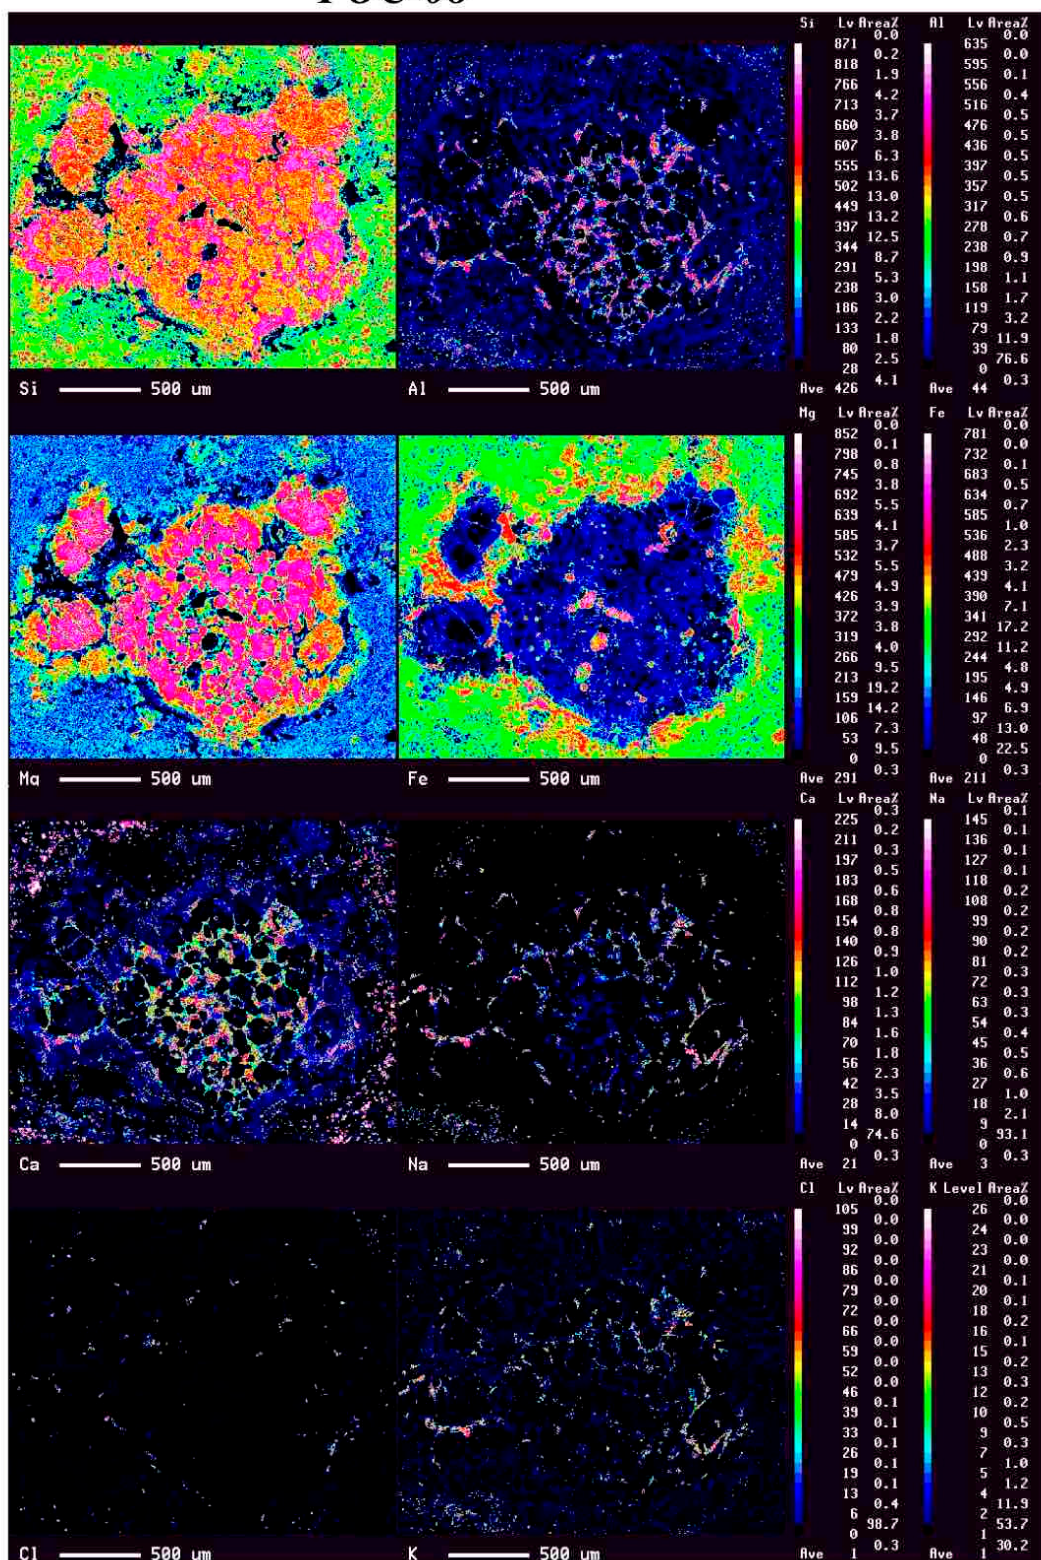

# POC-09

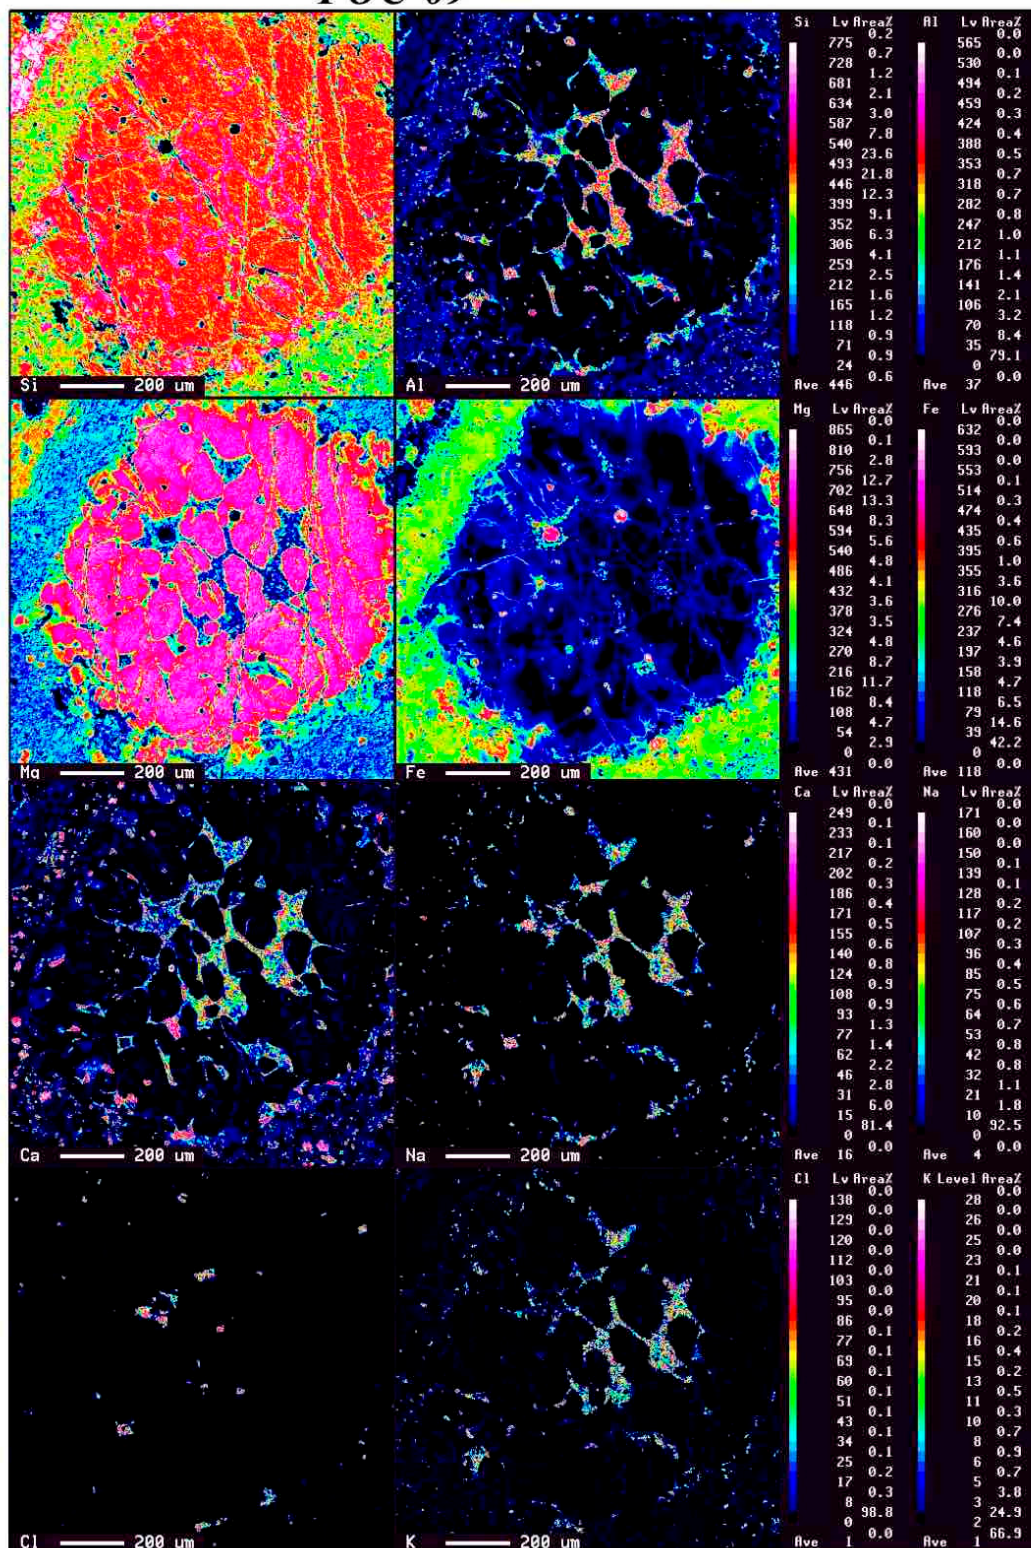

# POC-10

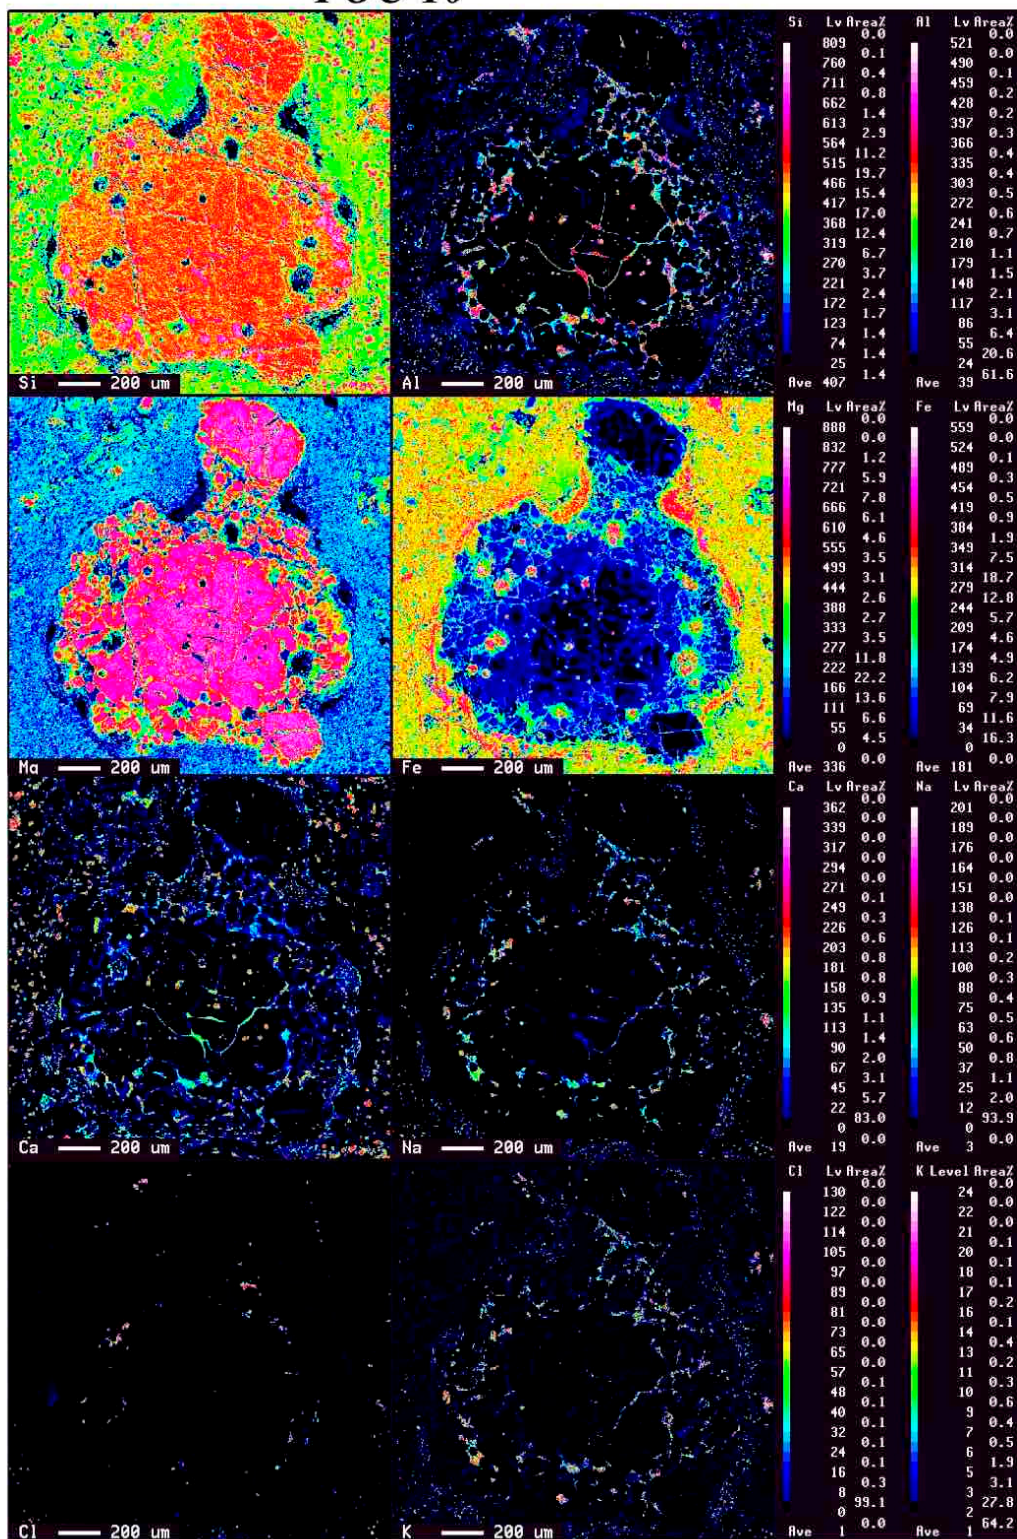

# POC-11

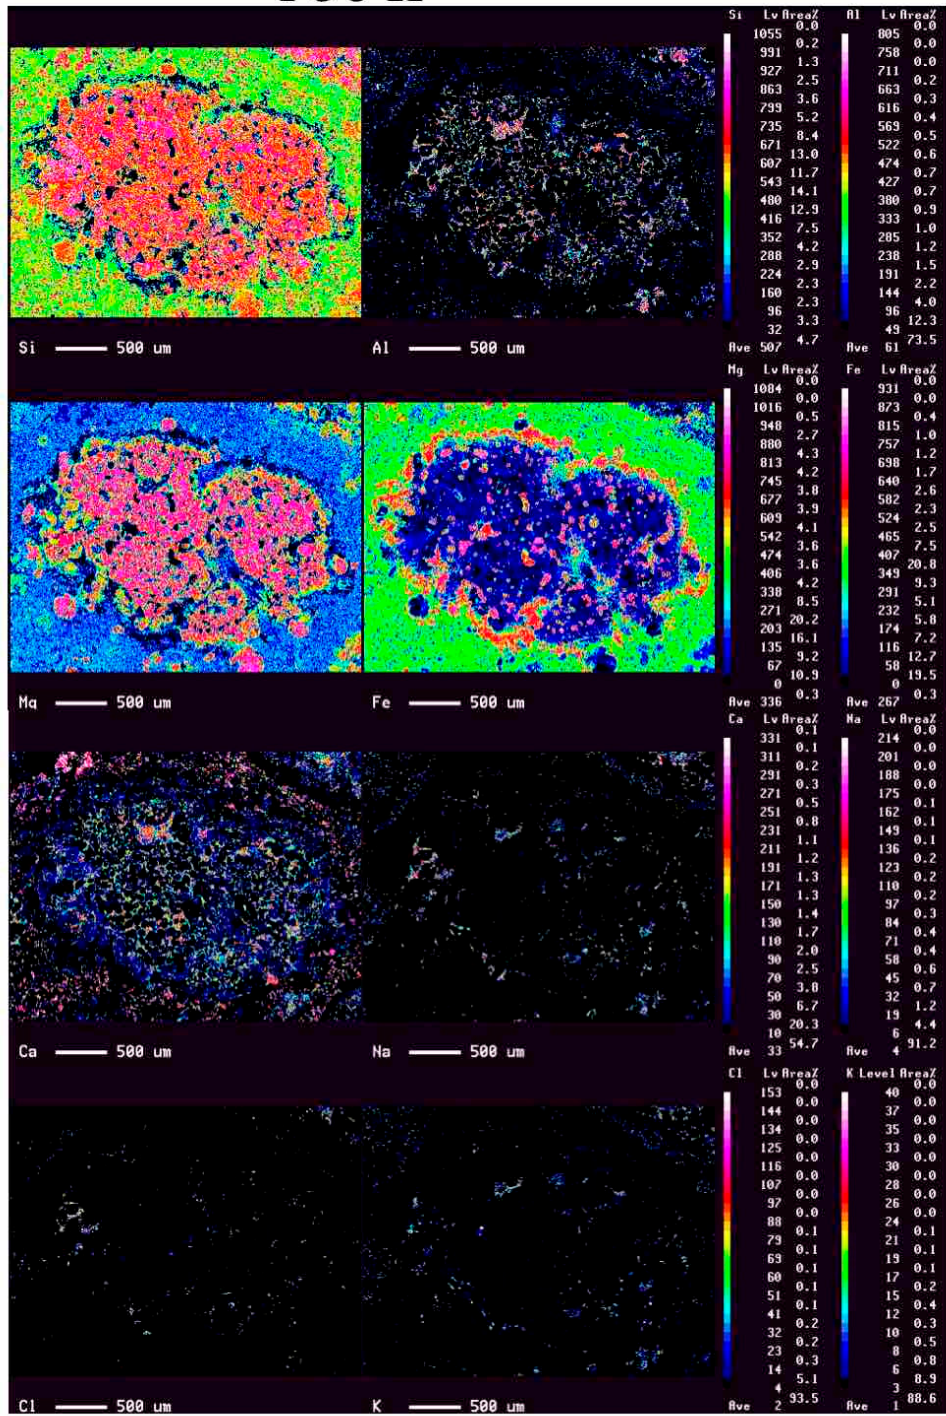

# POC-12

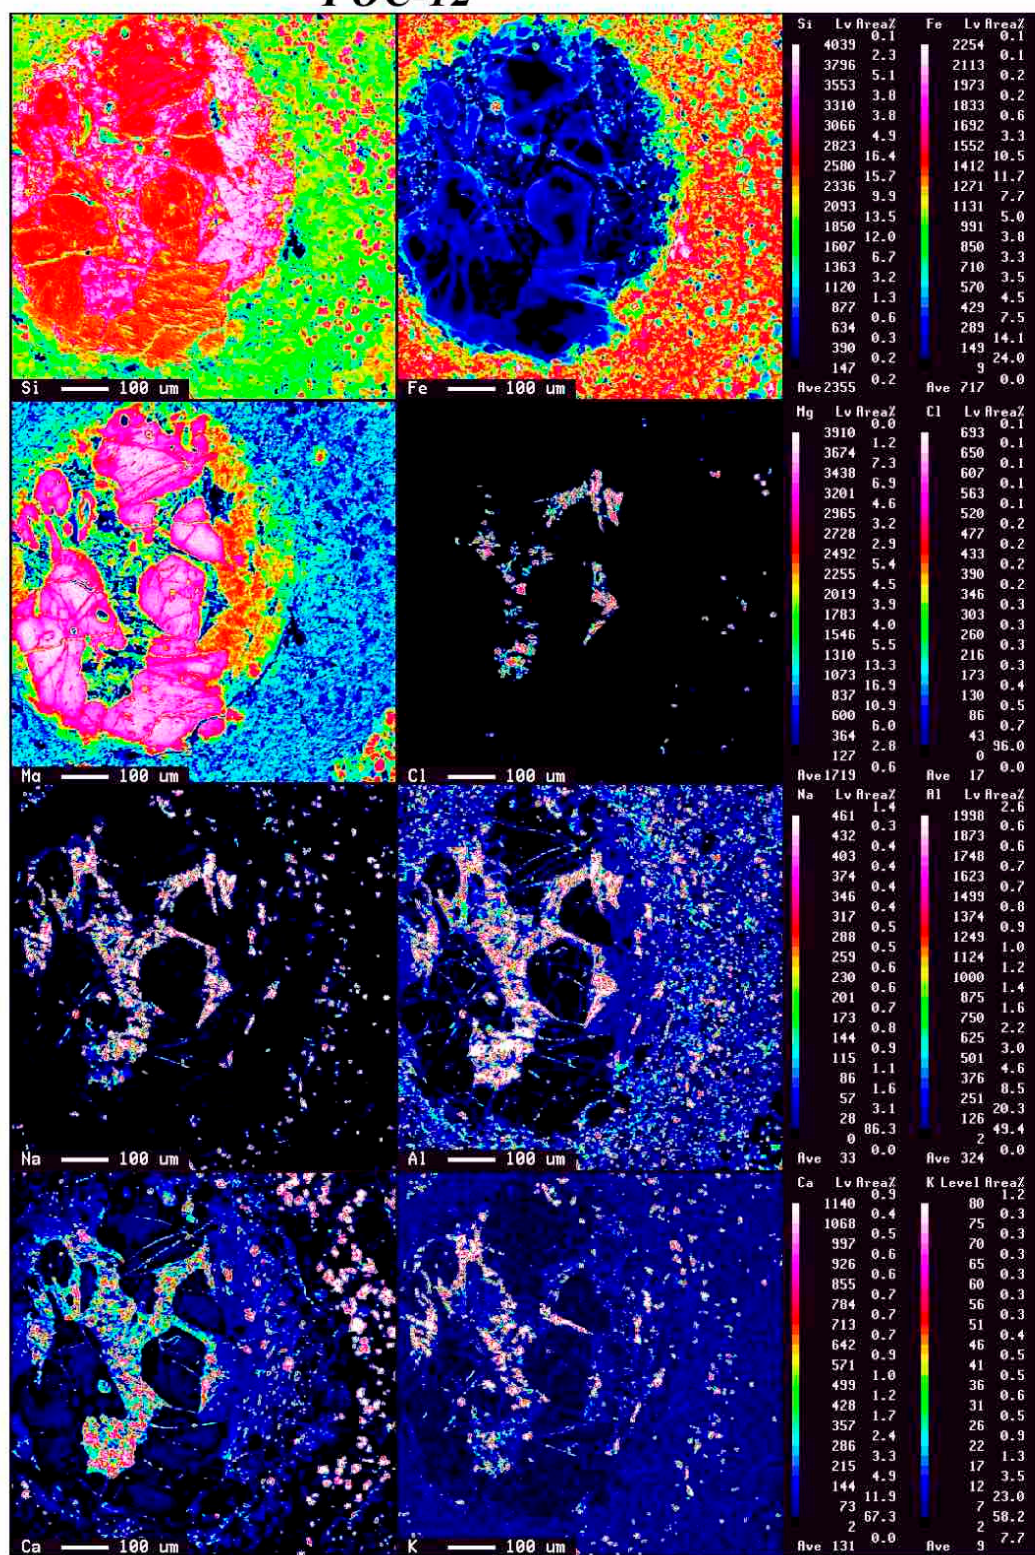

# POC-13

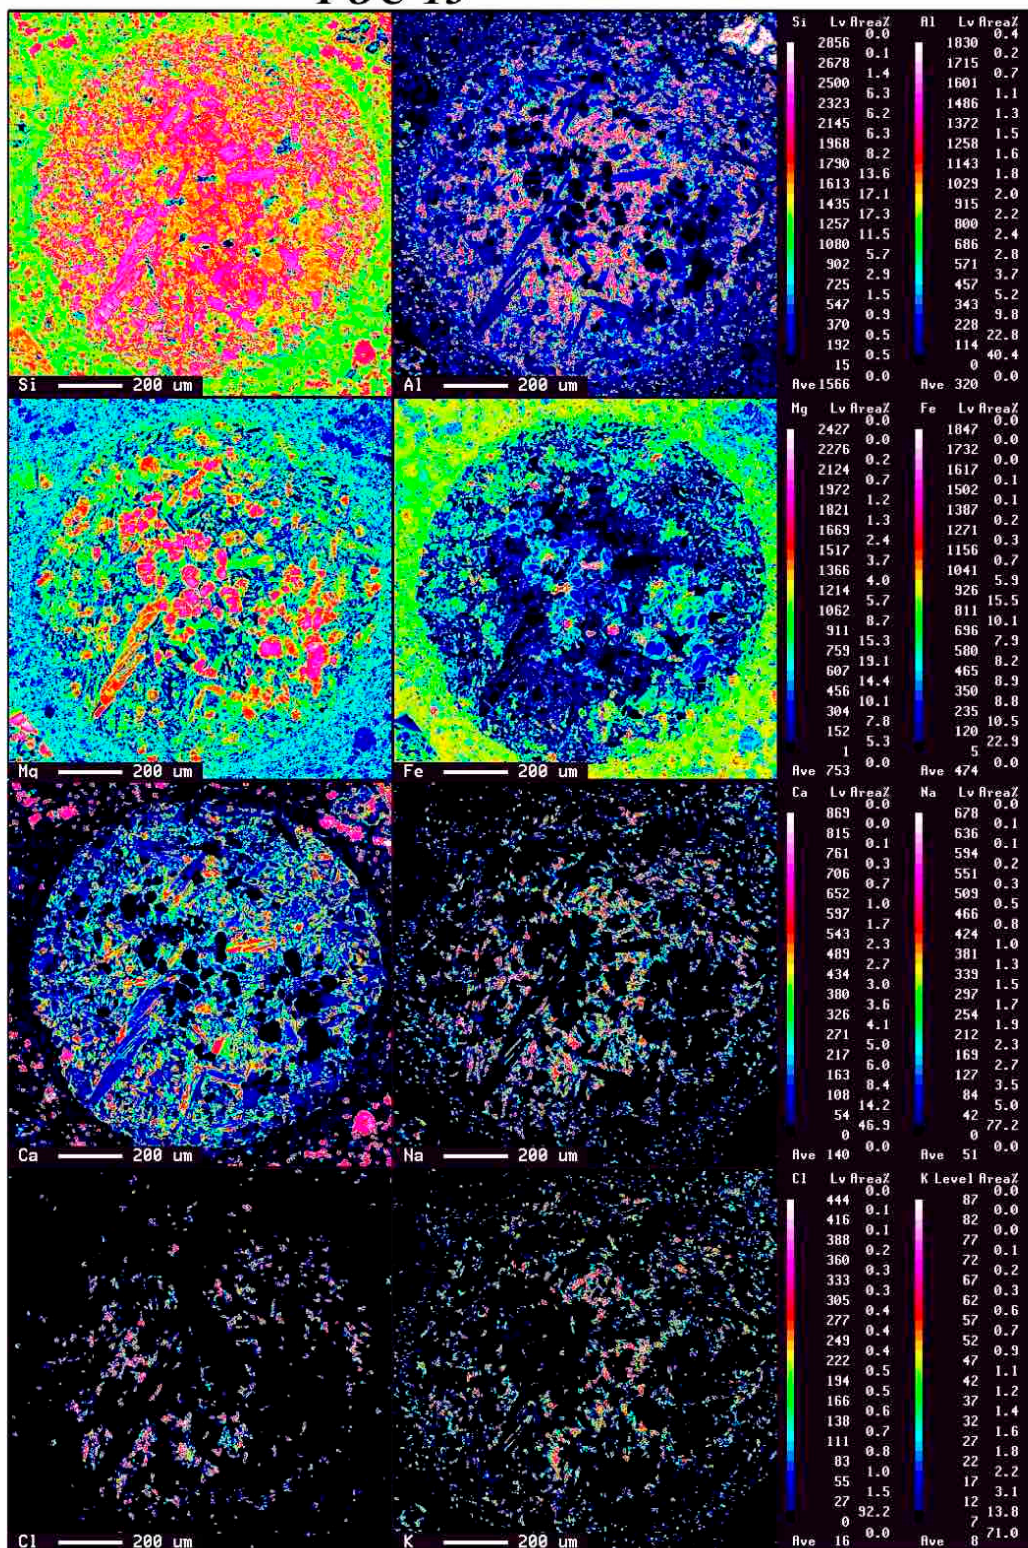

# POC-14

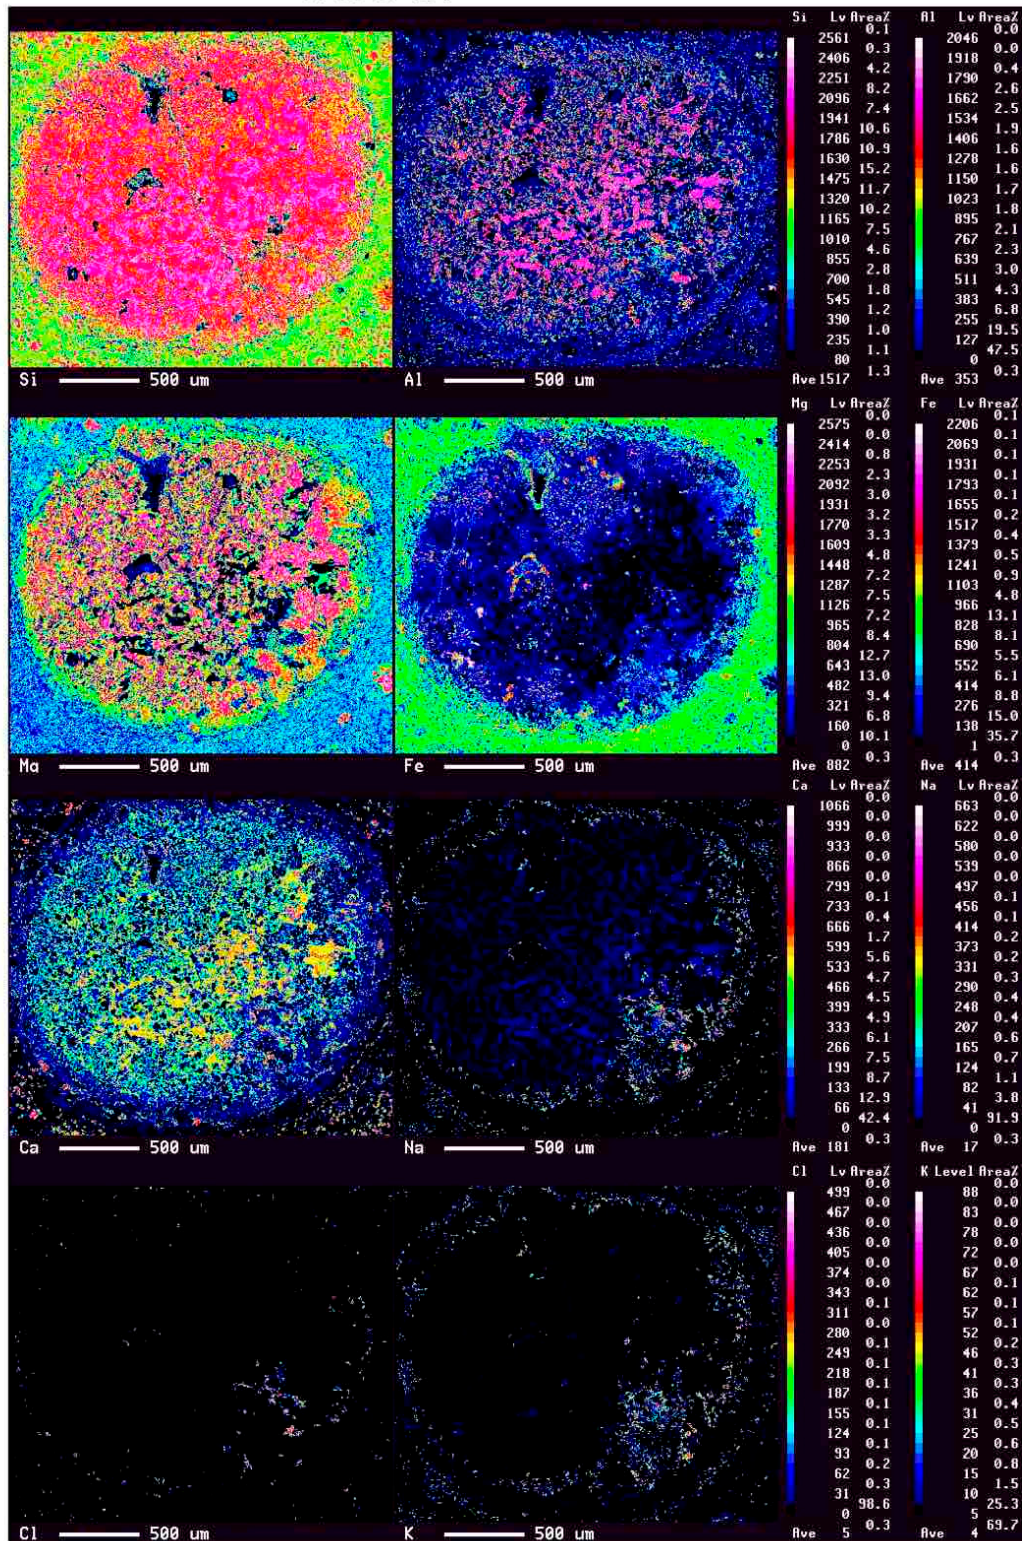

# POC-15

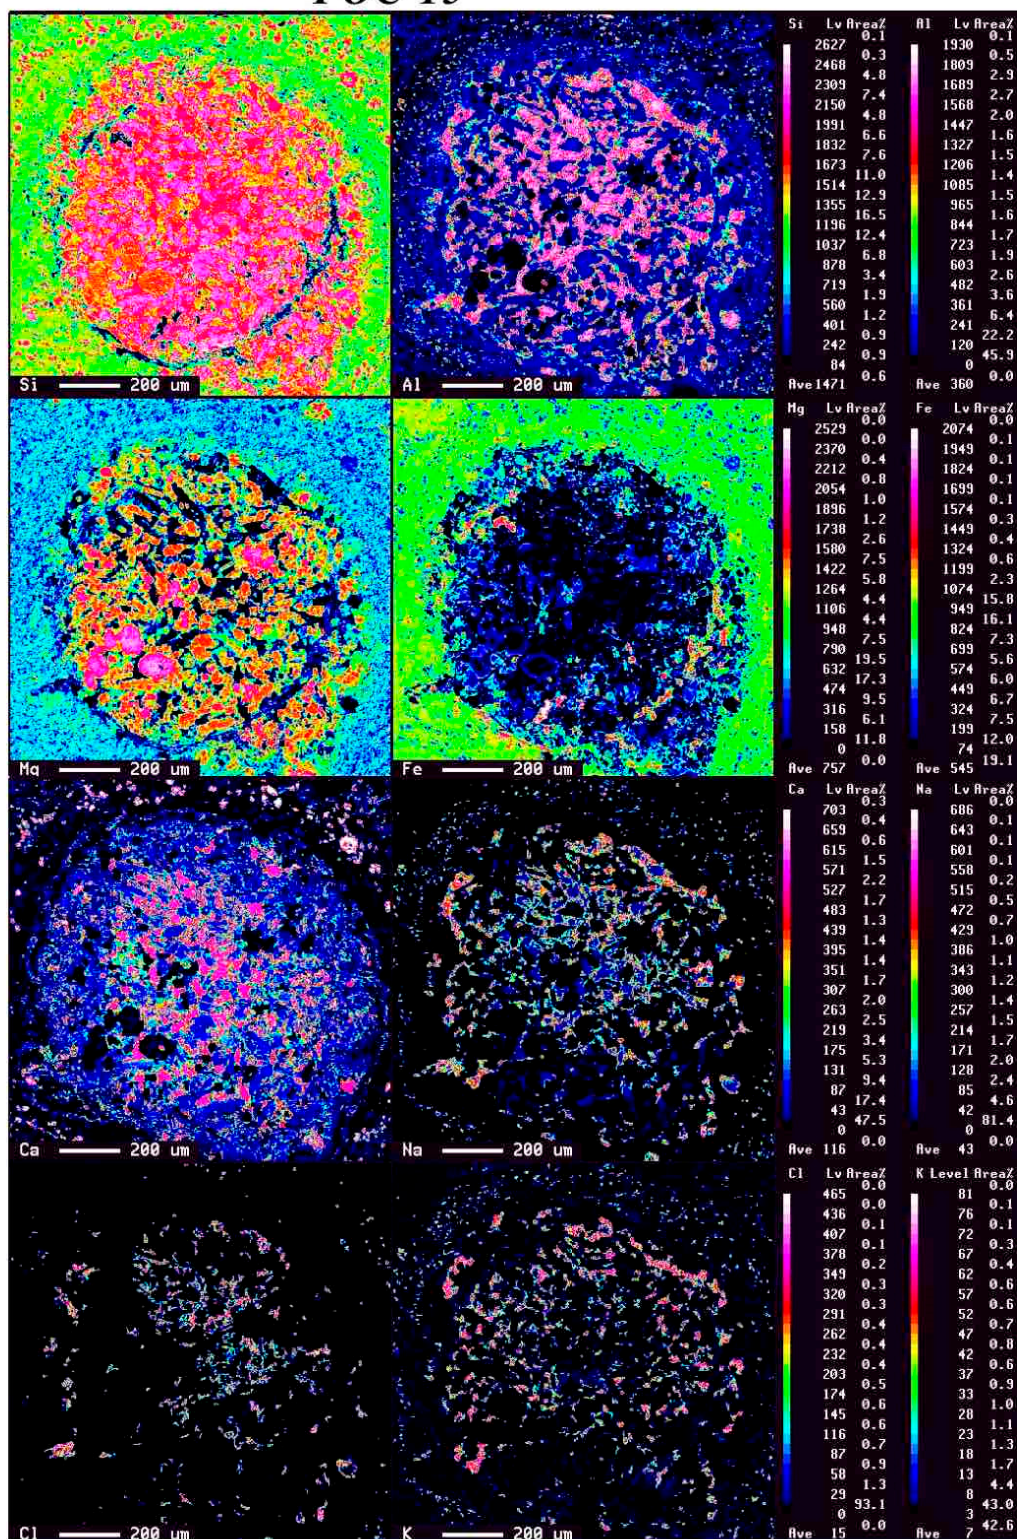

# POC-16

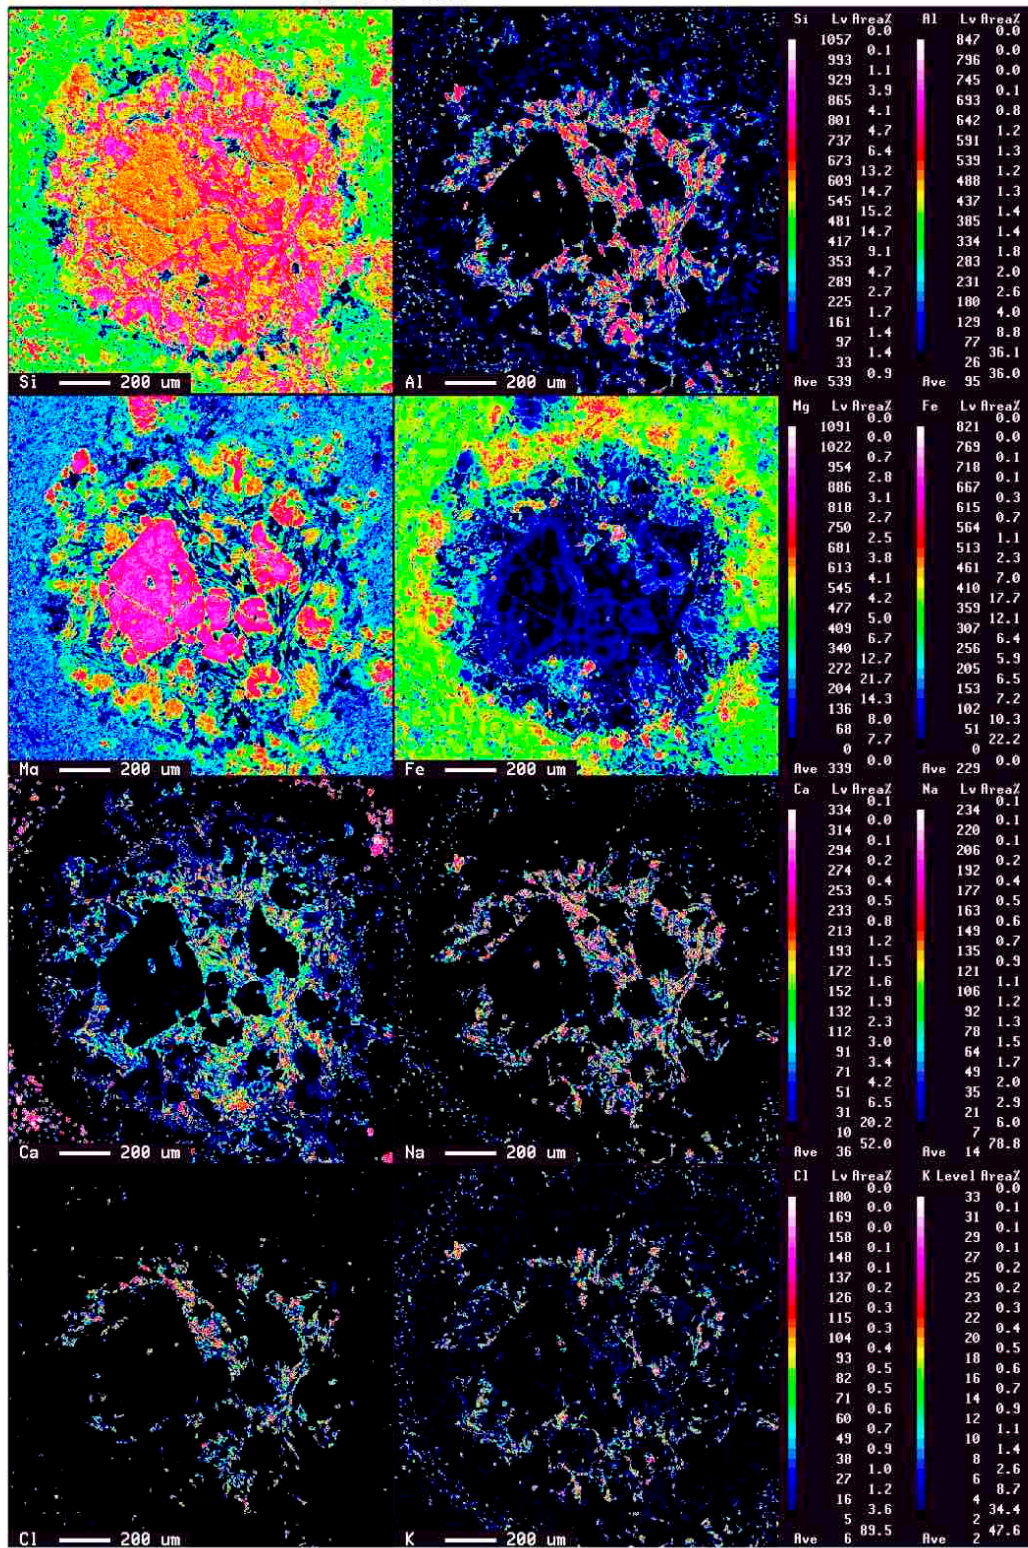

# POC-17

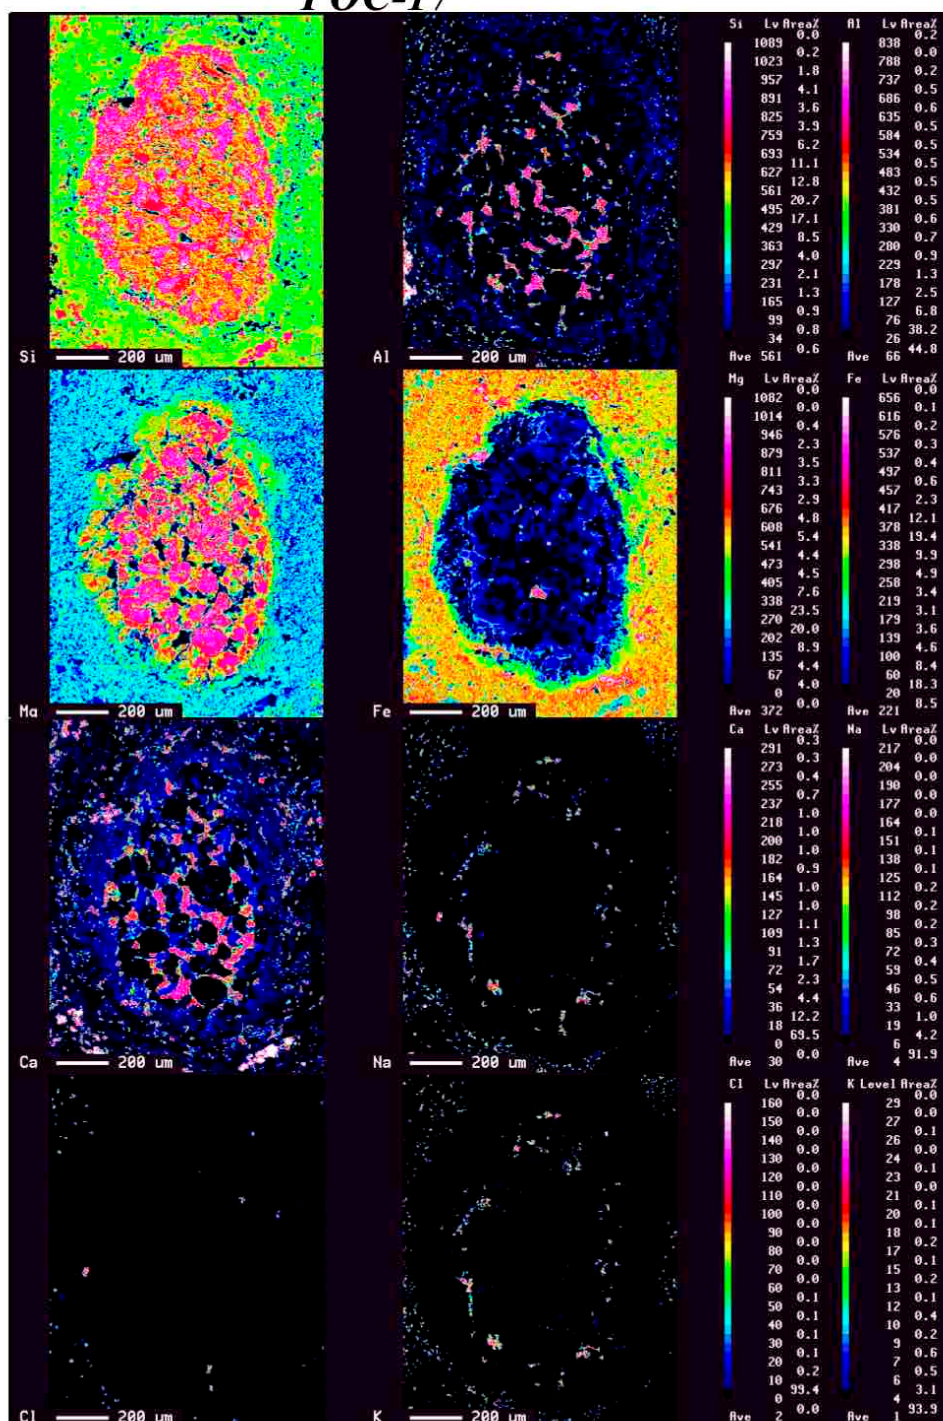

# POC-18

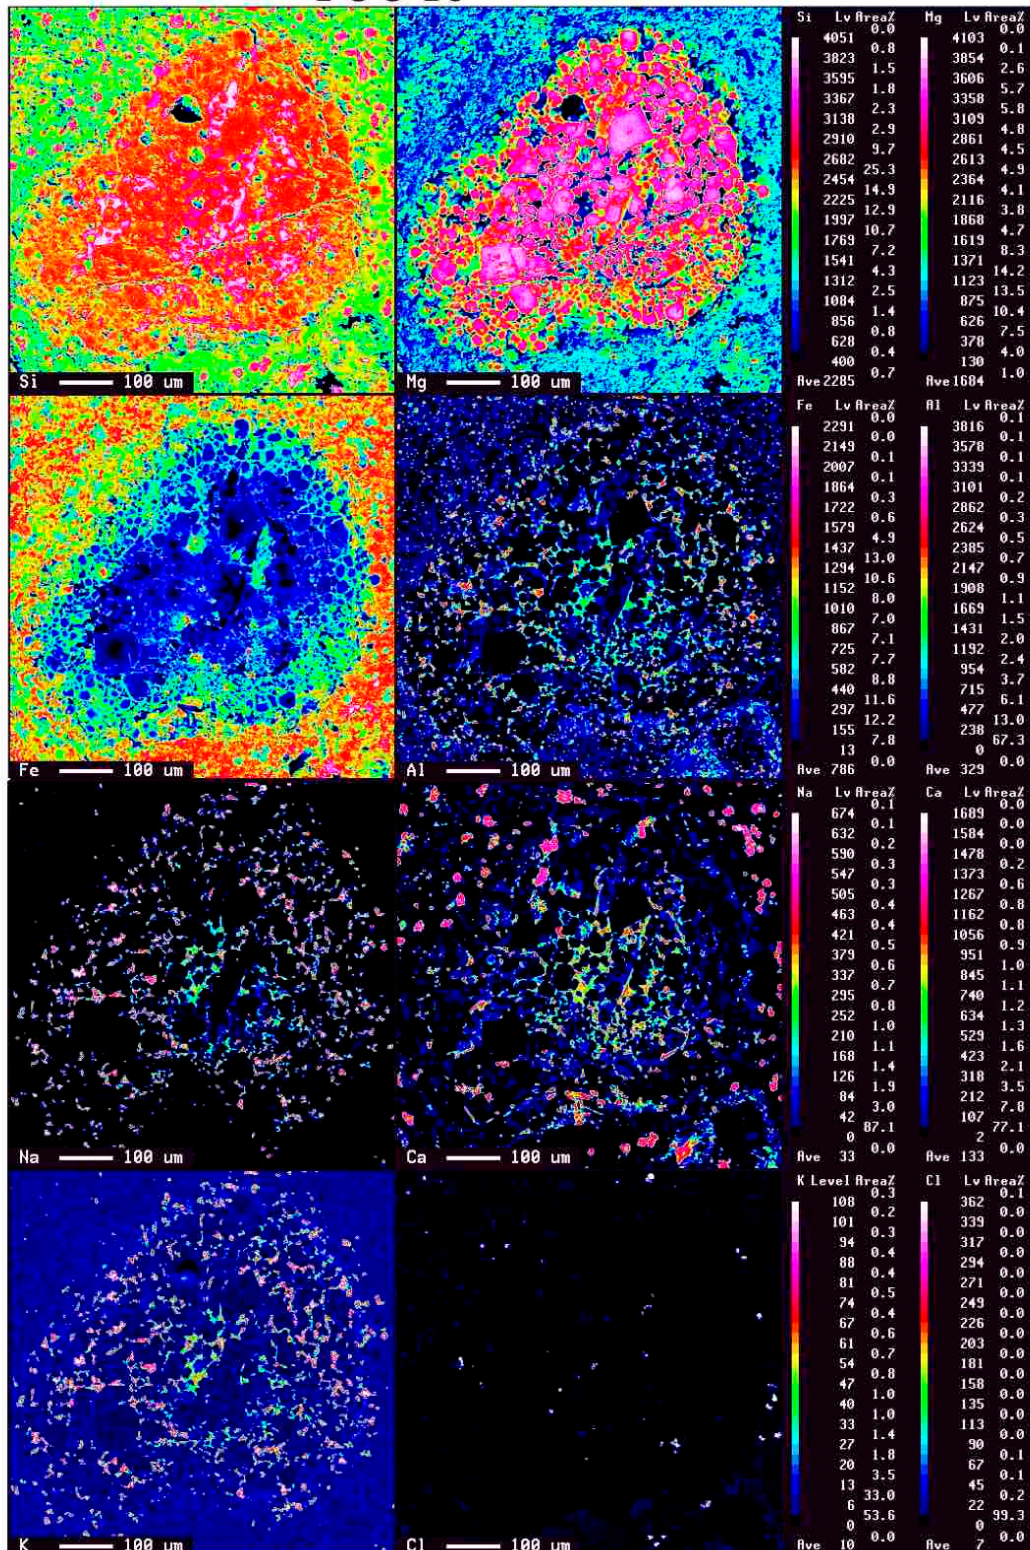

# POC-19

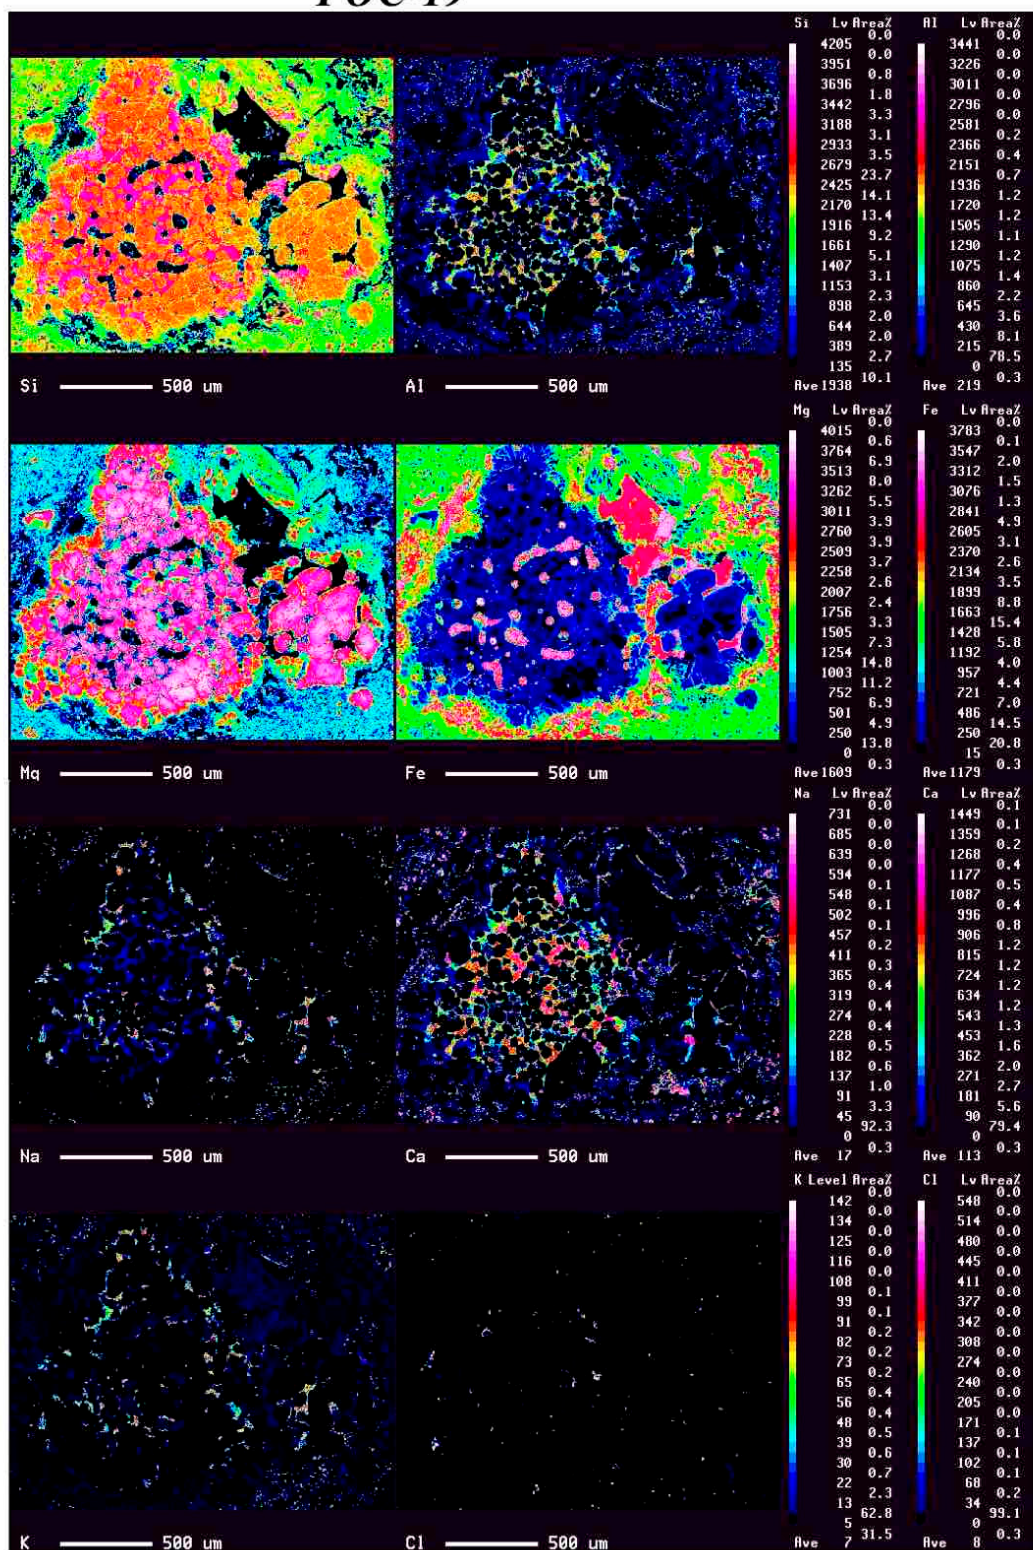

# UC-01

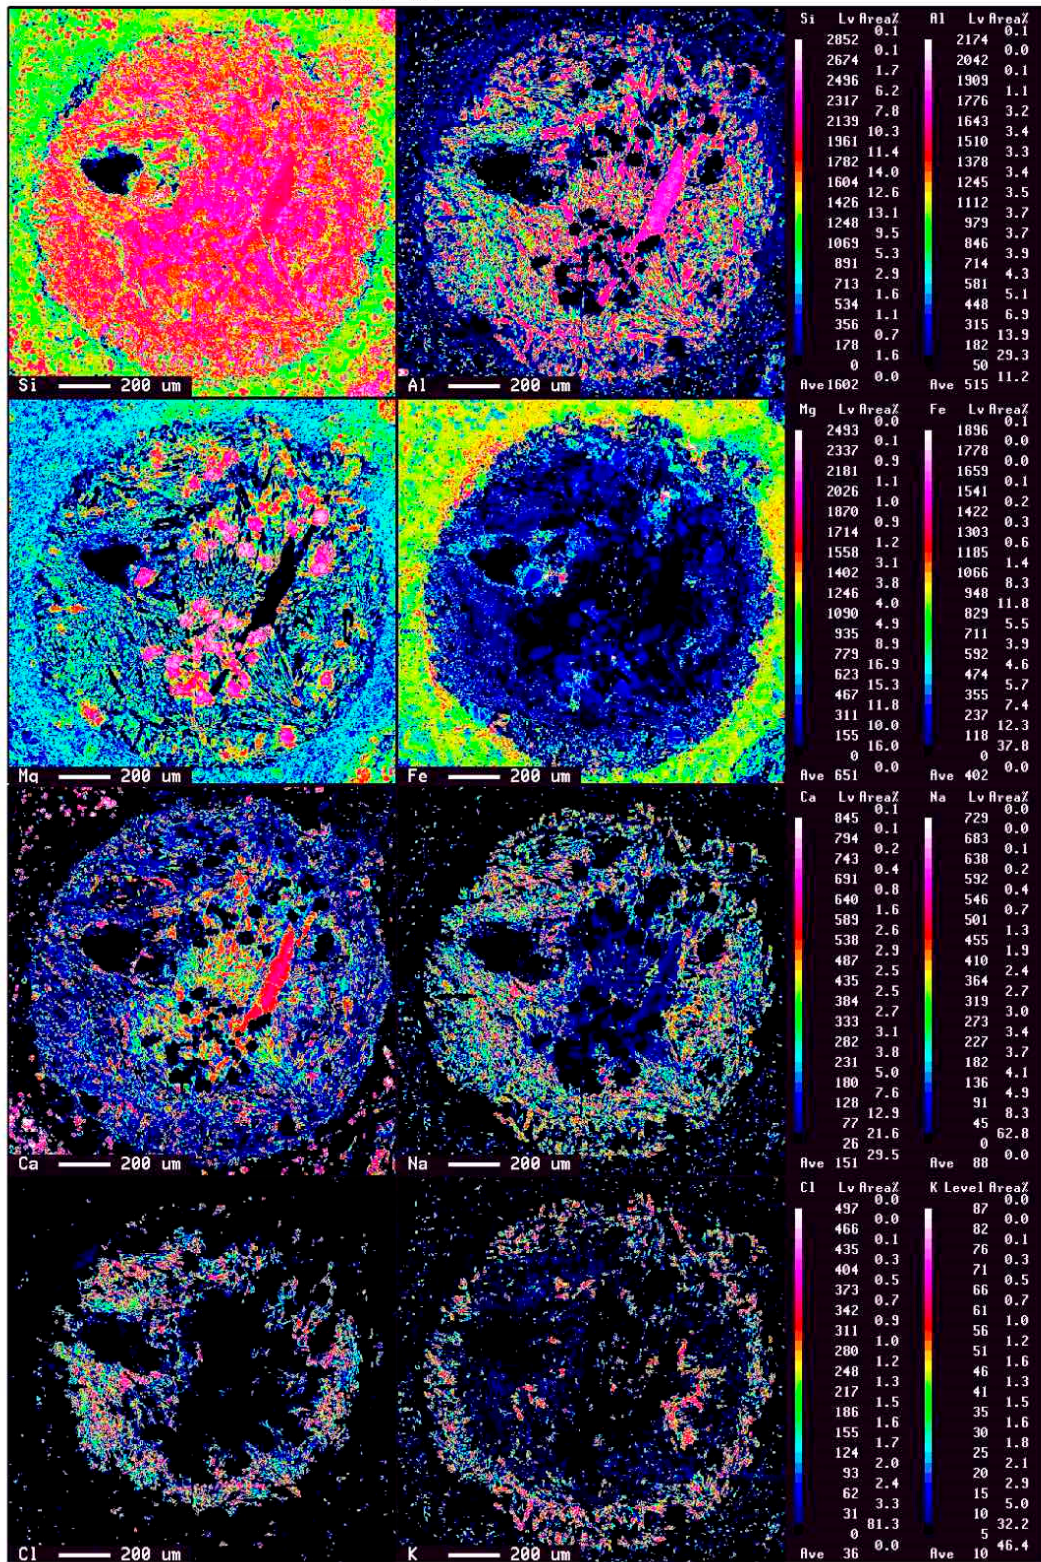

# UC-02

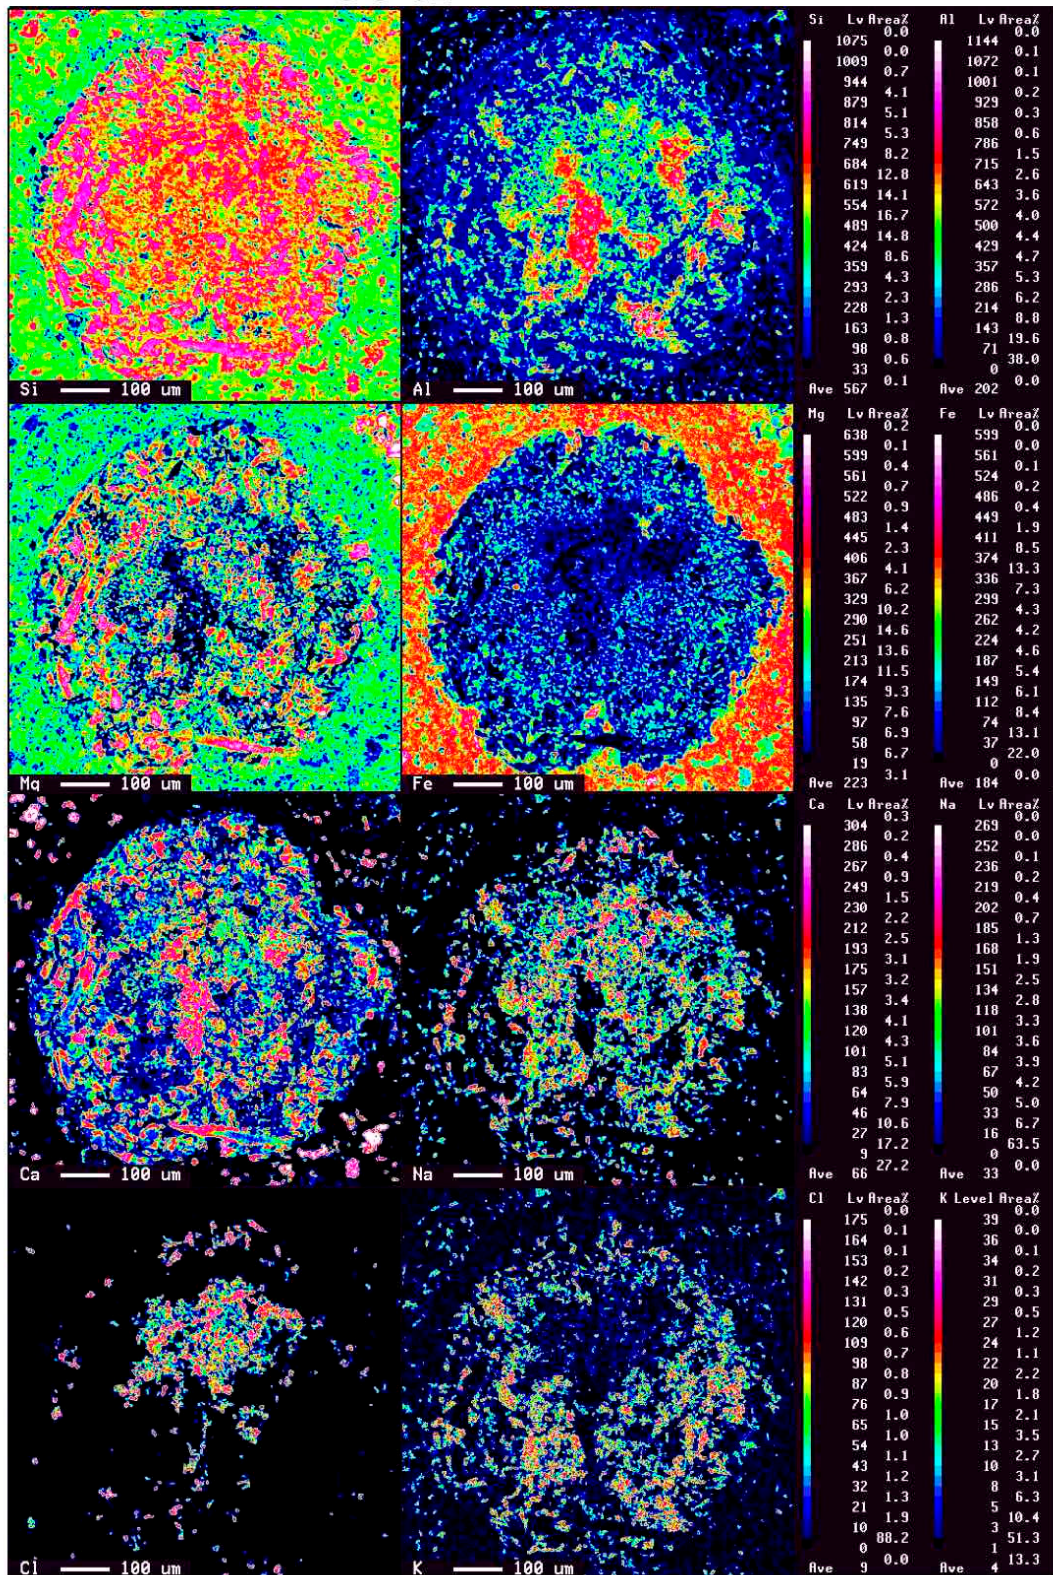

# UC-03

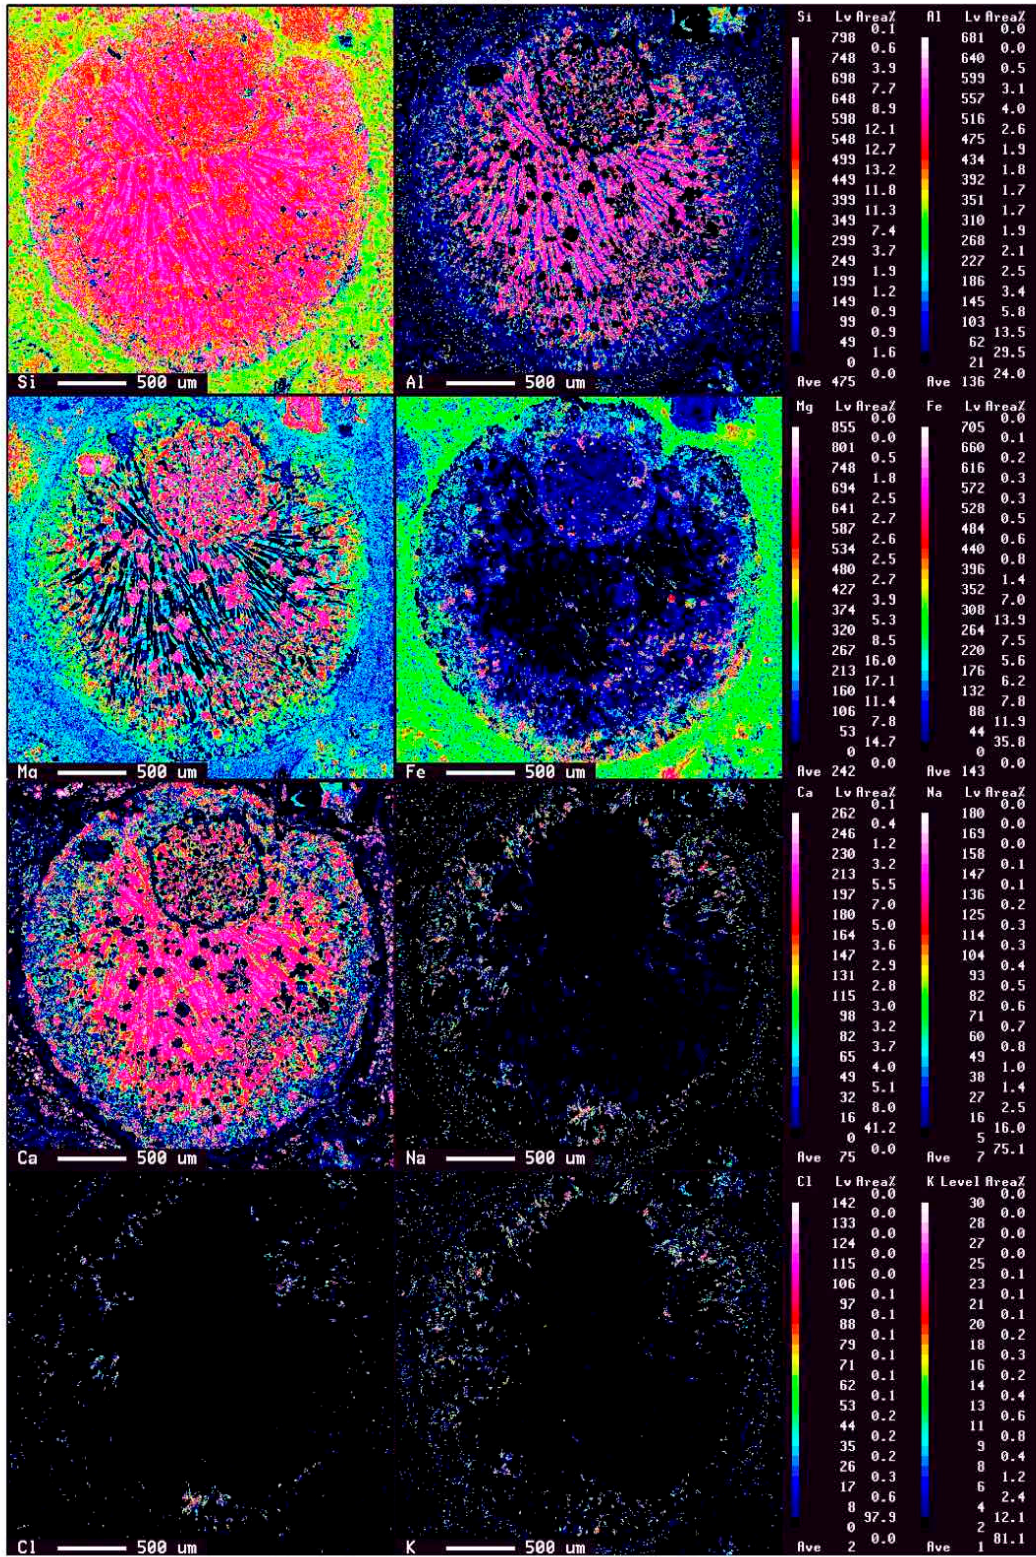

# OF-01

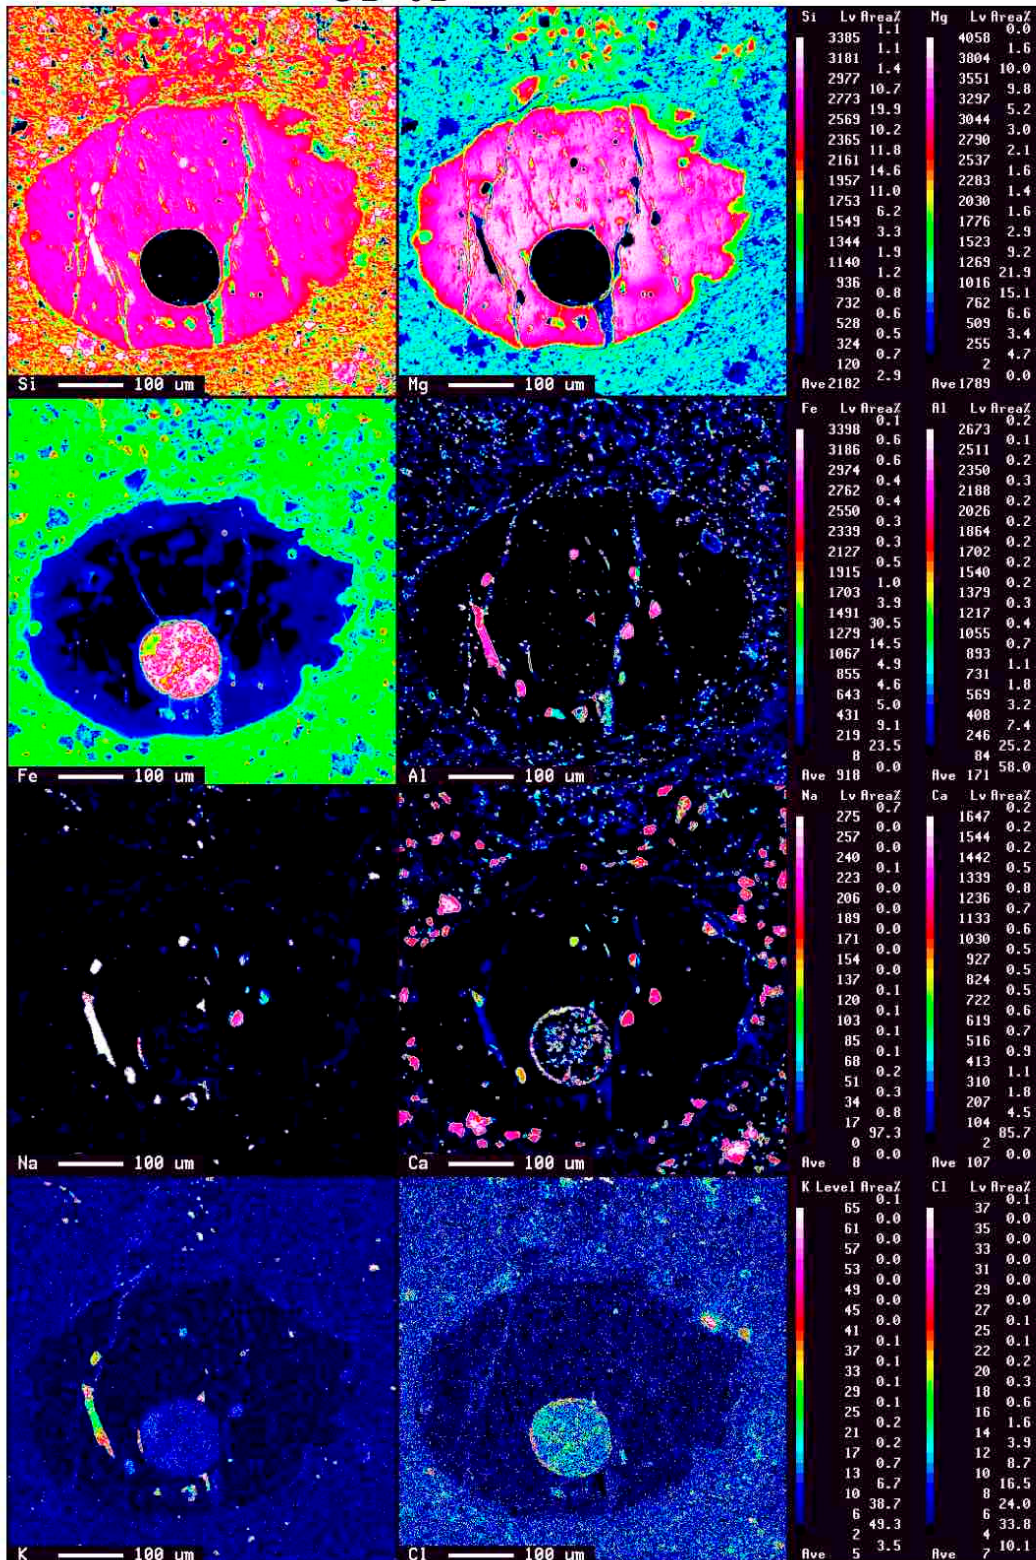

# OF-02

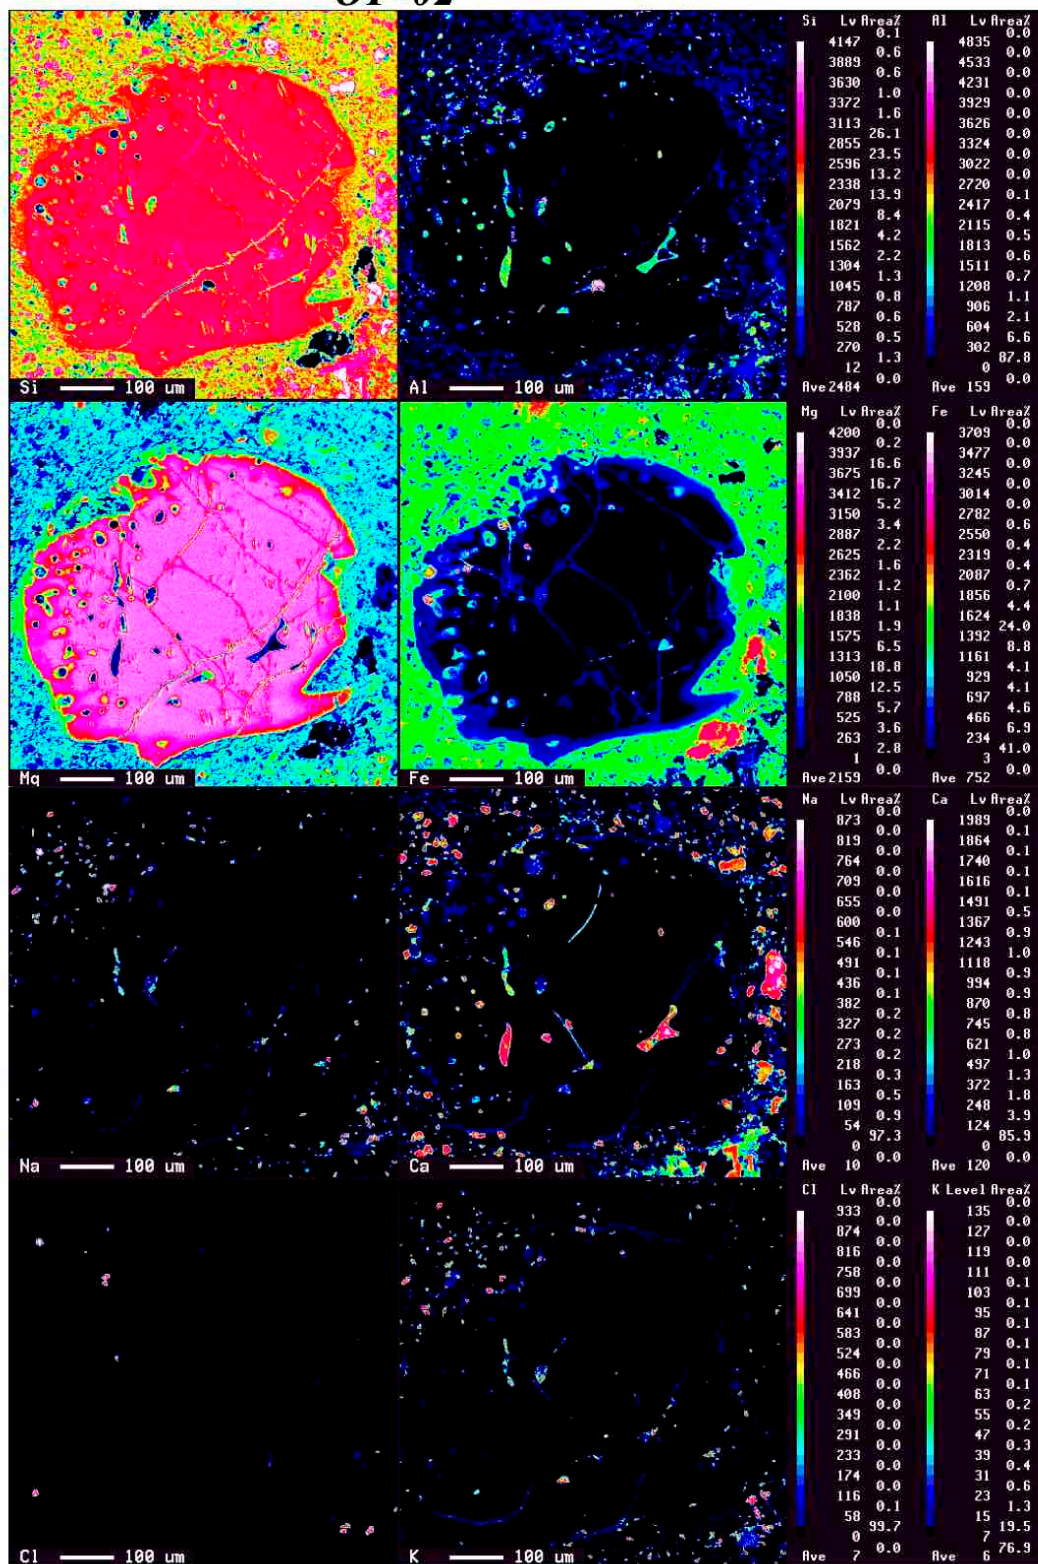

# CAI-01

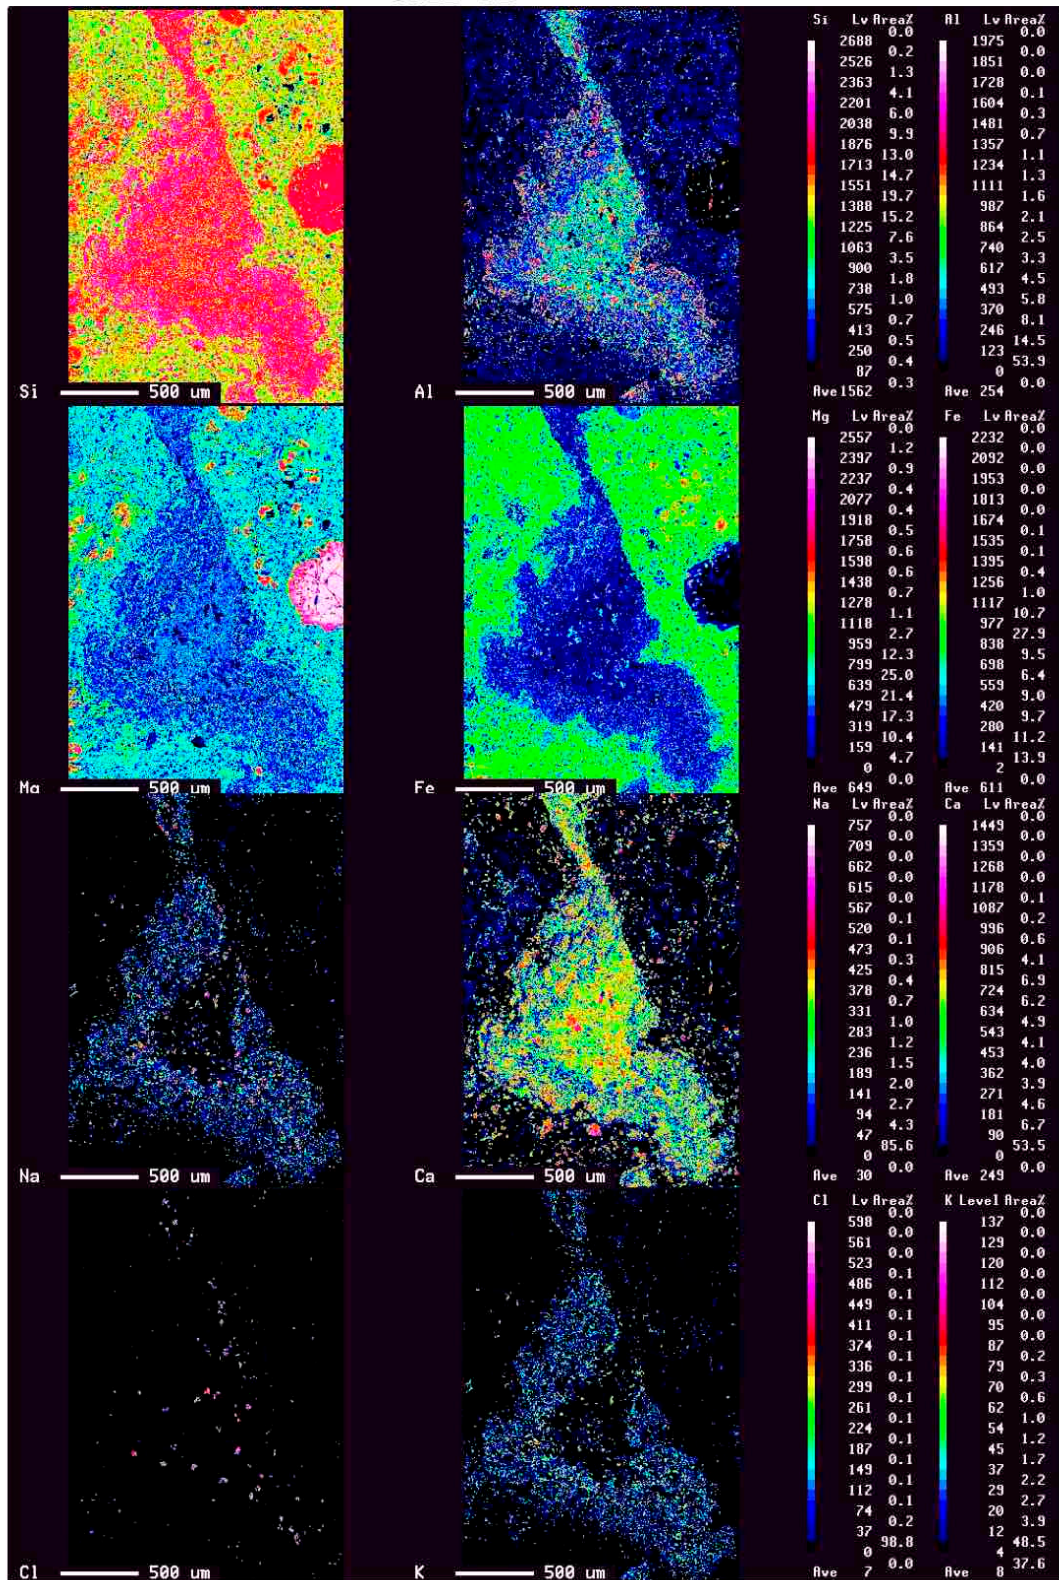

# CAI-02

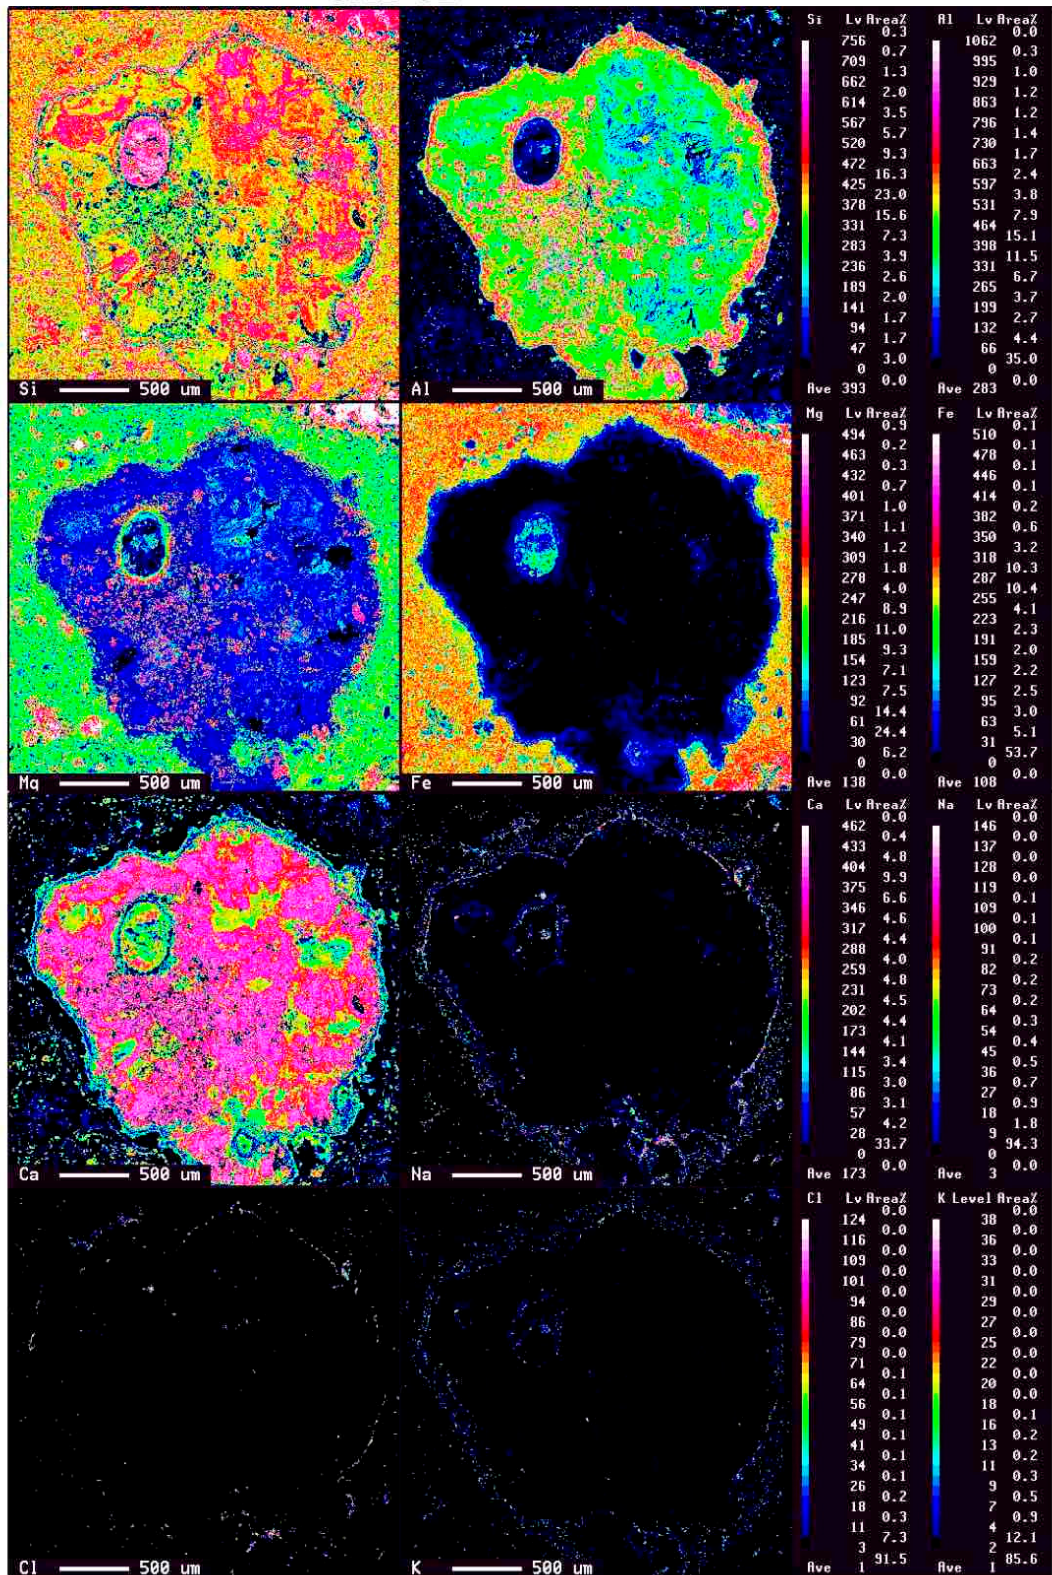

Supplement: s1 [file s1 › SF2.pdf]
