# Supplementary material for: In Situ Argon Isotope Analyses of Chondrule-Forming Materials in the Allende Meteorite: A Preliminary Study for 40Ar/39Ar Dating Based on Cosmogenic 39Ar
Source: MDPI journal article supplement (doi:10.3390/min13010031), 2022-12-25
Supplement: s1 [file s1]

Archive with 5 entries (5 files):
- SF1.pdf
- SF2.pdf
- ST1.xls
- ST2.xls
- supplementary.pdf
