# Supplementary material for: In Situ Argon Isotope Analyses of Chondrule-Forming Materials in the Allende Meteorite: A Preliminary Study for 40Ar/39Ar Dating Based on Cosmogenic 39Ar
Source: MDPI journal article supplement (doi:10.3390/min13010031), 2022-12-25
Supplement: s1 [file s1 › ST1.xls]

## Sheet: BOC1
Representative analyses of the analysed Allende chondrule (BOC-01).																				Representative analyses of the analysed Allende chondrule (BOC-01). (Continued)
Analysis#		51	53	56	64	133	143	186	187	193		32	35	48	111	112	128	132		Analysis#		11	13	14	15		153	158		1
Mineral		Ol (core)										Ol (rim)								Mineral		Al-rich Cpx					Pl			Ne
SiO2		41.6	41.3	41.63	42	41.97	41.55	41.09	41.97	42.19		41.55	40.88	41.51	41.04	41.09	41.65	41.5		SiO2		53.16	53.07	52.06	52.81		44.61	44.62		43.563
TiO2		0.099	0.057	0.084	0.212	0.09	0.249	0.085	0.054	0.253		0.138	0.014	0.076	0.197	0.032	0.034	0.096		TiO2		2.1	1.69	1.471	1.649		0.121	0.167		0
Al2O3		0.022	0.097	0.048	0.086	0.059	0.127	0.046	0.036	0.1		0.201	0.098	0.046	0.112	0	0.094	0.137		Al2O3		3.5	5.59	8.14	4.48		33.43	32.65		34.267
Cr2O3		0.025	0.098	0.079	n.d.	0.086	0.172	0.106	0	0.187		0.289	0.21	0.04	0.242	n.d.	0.099	0.156		Cr2O3		0.461	0.553	0.385	0.499		0	0		0.015
FeO *		1.79	1.4	1.101	1.174	1.95	1.13	1.8	1.43	1.43		1.68	6.89	3.46	3.76	4.46	2.36	2.93		FeO *		0.451	0.465	0.707	0.46		0.518	0.093		0.062
MnO		0.041	0.079	0.031	0	0.041	0.093	0.03	0.057	0.034		0.02	0.044	0.05	0.013	0.035	0.027	0.048		MnO		0.071	0.087	0.032	0.067		0.022	0.007		0
MgO		56.39	56.53	56.97	56.53	55.83	56.69	56.84	56.47	55.4		56.09	52.01	54.95	54.57	53.76	55.18	55.11		MgO		20.76	20.72	18.54	20.34		1.009	0.774		0.224
CaO		0.325	0.303	0.21	0.299	0.298	0.217	0.243	0.27	0.234		0.297	0.187	0.301	0.244	0.277	0.271	0.196		CaO		20.14	17.69	19.01	20.14		18.72	18.49		2.499
Na2O		0	0.011	0.02	0.011	n.d.	n.d.	0.034	n.d.	0.011		n.d.	n.d.	n.d.	0.011	0.022	n.d.	n.d.		Na2O		0.083	0.124	0.142	0.132		0.888	1.008		17.256
K2O		n.d.	n.d.	n.d.	0.017	0.006	0.011	n.d.	0.019	n.d.		0.01	0.014	0.007	0.017	n.d.	n.d.	0.017		K2O		0.013	n.d.	n.d.	n.d.		0.046	0.023		1.808
NiO		0.008	n.d.	n.d.	n.d.	0.015	n.d.	0.031	n.d.	0.091		n.d.	n.d.	0.035	0.008	0.066	n.d.	n.d.		NiO		-	-	-	-		-	-		-
Cl		-	-	-	-	-	-	-	-	-		-	-	-	-	-	-	-		Cl		-	-	-	-		-	-		-
Total		100.3	99.875	100.173	100.329	100.345	100.239	100.305	100.306	99.93		100.275	100.347	100.475	100.214	99.742	99.715	100.19		Total		100.739	99.989	100.487	100.577		99.364	97.832		99.694
O=		4	4	4	4	4	4	4	4	4		4	4	4	4	4	4	4		O=		6	6	6	6		8	8		4
Si		0.982476	0.978561	0.981347	0.987843	0.990374	0.979504	0.971976	0.988612	0.996771		0.981289	0.986567	0.985567	0.979141	0.987134	0.990594	0.985518		Si		1.8841	1.87697	1.83803	1.87366		2.08197	2.10904		1.0318
Ti		0.00175871	0.00101588	0.00148945	0.00375063	0.00159747	0.00441534	0.0015124	0.000956776	0.0044961		0.00245151	0.00025414	0.0013573	0.00353536	0.000578255	0.00060826	0.00171481		Ti		0.0559846	0.0449598	0.0390652	0.0440073		0.00424772	0.00593747		0
Al		0.000612361	0.00270873	0.00133356	0.00238393	0.00164085	0.00352854	0.00128243	0.000999414	0.00278447		0.00559472	0.00278739	0.0012872	0.00314929	0	0.0026349	0.00383436		Al		0.146199	0.233011	0.33871	0.187331		1.8388	1.81884		0.956555
Cr		0.000466814	0.00183586	0.00147237	0	0.00160448	0.00320581	0.00198244	0	0.00349303		0.00539633	0.00400691	0.000750876	0.00456487	0	0.00186162	0.00292898		Cr		0.012918	0.0154635	0.0107469	0.0139975		0	0		0.000280895
Fe		0.0353539	0.027741	0.021705	0.0230921	0.0384814	0.0222777	0.035608	0.0281695	0.0282539		0.0331811	0.139056	0.0687014	0.0750208	0.0896047	0.0469406	0.0581889		Fe		0.0133676	0.0137536	0.0208749	0.0136486		0.0202175	0.00367616		0.00122808
Mn		0.000820159	0.00158544	0.000618961	0	0.000819463	0.00185696	0.000601071	0.00113723	0.000680377		0.000400075	0.000899401	0.00100552	0.000262704	0.000712185	0.000543913	0.000965479		Mn		0.00213139	0.00260623	0.000956936	0.00201342		0.000869659	0.000280245		0
Mg		1.98536	1.99676	2.00203	1.9821	1.96398	1.99228	2.00439	1.98296	1.95121		1.97479	1.87116	1.94496	1.94089	1.92534	1.95646	1.95099		Mg		1.09687	1.09246	0.975812	1.07581		0.0702006	0.0545387		0.00790923
Ca		0.00822404	0.00769225	0.00530406	0.007535	0.00753442	0.0054811	0.00615884	0.00681434	0.00592345		0.00751546	0.00483538	0.00765725	0.00623736	0.00713005	0.00690595	0.00498707		Ca		0.764808	0.670361	0.719123	0.765609		0.936096	0.936408		0.0634187
Na		0	0.000505332	0.000914098	0.000501624	0	0	0.00155935	0	0.000503877		0	0	0	0.000508835	0.00102473	0	0		Na		0.00570354	0.00850307	0.00972037	0.00908019		0.0803527	0.0923766		0.792436
K		0	0	0	0.000510089	0.000180622	0.000330816	0	0.000570951	0		0.00030129	0.000431025	0.000212026	0.000517423	0	0	0.00051502		K		0.000587789	0	0	0		0.00273878	0.00138689		0.0546304
Ni		0.000151985	0	0	0	0.00028473	0	0.000589879	0	0.00172946		0	0	0.000668473	0.000153536	0.00127546	0	0		Ni		-	-	-	-		-	-		-
Cl		-	-	-	-	-	-	-	-	-		-	-	-	-	-	-	-		Cl		-	-	-	-		-	-		-
Total		3.01523	3.0184	3.01622	3.00772	3.0065	3.01288	3.02566	3.01022	2.99585		3.01091	3.01	3.01216	3.01398	3.0128	3.00655	3.00964		Total		3.98267	3.95809	3.95304	3.98515		5.03548	5.02248		2.90826
FeO* = total Fe as FeO.					- not measured															FeO* = total Fe as FeO.						- not measured

## Sheet: BOC2
Representative analyses of the analysed Allende chondrule (BOC-02).
Analysis#		52	53	66		2	59	60		8	11	12	21	25	48
Mineral		Ol (core)				Ol (rim)				Mes
SiO2		34.822	36.728	34.653		35.667	35.351	34.825		43.09	36.652	36.65	45.346	37.194	29.357
TiO2		n.d.	n.d.	0.034		n.d.	0.034	n.d.		0.368	0.111	0.063	0.198	0.18	0.055
Al2O3		0.008	0.042	0.047		0.032	0.028	0		25.508	8.838	9.095	30.208	4.92	8.418
Cr2O3		n.d.	0.051	0		0	0.023	0		n.d.	1.138	1.194	0.029	0.064	0.031
FeO *		39.33	34.869	40.88		40.925	41.75	41.808		3.662	31.402	31.619	3.359	33.209	37.227
MnO		0.421	0.293	0.238		0.342	0.351	0.266		0.134	0.334	0.233	0.049	0.277	0.282
MgO		24.292	28.485	23.403		23.117	22.483	22.184		2.47	15.975	16.128	0.773	17.714	19.166
CaO		0.092	0.103	0.171		0.265	0.187	0.228		5.728	1.488	1.537	5.014	2.86	0.452
Na2O		0.03	0.014	0.145		0	0.108	0.048		15.284	2.438	2.3	13.346	1.857	1.387
K2O		n.d.	n.d.	n.d.		n.d.	0.016	0		0.057	0.071	0.033	1.452	0.029	0.024
NiO		0.162	0.049	0.012		0.021	0.098	0.059		0.237	0.178	0.149	0.029	0.205	3.252
Cl		-	-	-		-	-	-		4.114	1.227	1.427	n.d.	0.744	0.308
Total		99.157	100.634	99.583		100.369	100.429	99.418		100.652	99.852	100.428	99.803	99.253	99.959
O=		4	4	4		4	4	4		24	24	24	24	24	24
Si		0.999205	1.00875	0.996843		1.01422	1.01024	1.00759		6.19853	5.98279	5.94291	6.48996	6.1923	5.08197
Ti		8.63357e-05	0	0.000735689		0	0.000730858	4.35262e-05		0.0398189	0.0136288	0.00768414	0.0213156	0.0225414	0.00716164
Al		0.00027055	0.00135954	0.00159345		0.00107243	0.000943059	0		4.32458	1.70026	1.73814	5.09543	0.965385	1.71745
Cr		0	0.00110747	0		0	0.00051967	0		0	0.146867	0.153075	0.00328153	0.00842431	0.00424284
Fe		0.943802	0.800908	0.983451		0.973215	0.997785	1.01159		0.440541	4.28667	4.28775	0.40204	4.62372	5.38932
Mn		0.0102322	0.00681616	0.00579893		0.00823712	0.00849605	0.00651865		0.0163268	0.0461783	0.0320012	0.00593997	0.0390611	0.041348
Mg		1.03914	1.1663	1.00361		0.979951	0.957828	0.95684		0.529685	3.88737	3.89865	0.164927	4.39647	4.94607
Ca		0.00282854	0.00303108	0.00527054		0.0080739	0.00572584	0.00706804		0.882852	0.260245	0.267037	0.768883	0.510174	0.0838362
Na		0.00166905	0.000745524	0.00808724		0	0.00598404	0.00269264		4.2628	0.77159	0.723102	3.7034	0.599429	0.465525
K		0	0	0		0	0.000583315	0		0.0104603	0.0147851	0.00682649	0.265111	0.00615936	0.00530017
Ni		0.00373937	0.00108259	0.000277683		0.000480359	0.00225285	0.00137317		0.0274247	0.0233727	0.0194354	0.00333874	0.0274546	0.452849
Cl		-	-	-		-	-	-		1.00297	0.33944	0.392158	0	0.209925	0.0903613
Total		3.00097	2.99011	3.00567		2.98525	2.99109	2.99372		17.736	17.4732	17.4688	16.9236	17.601	18.2854
FeO* = total Fe as FeO.						- not measured

## Sheet: BOC3
Representative analyses of the analysed Allende chondrule (BOC-03).
Analysis#		1	2	3	17		9	22		13	14	15	20
Mineral		Ol (core)					Ol (rim)			Opx
SiO2		43.058	43.294	41.61	40.293		38.779	37.79		54.624	59.822	57.527	57.605
TiO2		0.022	0.042	0.036	0.057		0.054	0.068		0.25	0.118	0.64	0.166
Al2O3		0.108	0.211	0.157	0.514		2.338	0.263		1.392	0.762	1.776	1.122
Cr2O3		n.d.	0.066	0.202	0.29		0	0.277		0.749	0.466	1.077	0.542
FeO *		0.721	0.431	5.461	10.259		23.298	26.295		5.61	0.915	1.354	2.396
MnO		n.d.	n.d.	0.106	0.007		0.077	0.149		0.227	0.087	0.375	0.132
MgO		55.928	56.177	51.621	47.07		35.252	34.717		35.668	37.427	32.82	35.774
CaO		0.4	0.391	0.326	0.393		0.135	0.163		0.819	0.524	4.48	1.101
Na2O		0.011	0.007	n.d.	n.d.		0.85	n.d.		0.075	0	0.014	0.077
K2O		n.d.	n.d.	n.d.	0.008		0.094	n.d.		0.013	n.d.	n.d.	0.013
NiO		0.057	n.d.	n.d.	0.038		n.d.	0.048		-	-	-	-
Cl		-	-	-	-		-	-		-	-	-	-
Total		100.305	100.619	99.519	98.929		100.877	99.781		99.427	100.121	100.063	98.928
O=		4	4	4	4		4	4		6	6	6	6
Si		1.00817	1.00897	1.00401	1.00013		1.00138	1.00383		1.90562	2.00599	1.96534	1.97714
Ti		0.000387463	0.000736259	0.000653388	0.00106422		0.00104888	0.00135869		0.00656028	0.00297632	0.0164466	0.00428562
Al		0.00298029	0.00579549	0.00446473	0.0150365		0.0711544	0.00823366		0.0572332	0.0301147	0.0715098	0.0453864
Cr		0	0.0012161	0.00385359	0.00569116		0	0.00581749		0.020659	0.0123546	0.0290909	0.0147079
Fe		0.0141179	0.00840011	0.110196	0.212955		0.503125	0.584131		0.163671	0.0256593	0.0386849	0.0687732
Mn		0	0	0.00216636	0.000147167		0.00168414	0.00335238		0.00670755	0.002471	0.0108513	0.00383739
Mg		1.95216	1.95173	1.85684	1.74173		1.35704	1.37478		1.85498	1.87095	1.67153	1.83043
Ca		0.0100349	0.00976342	0.0084281	0.0104519		0.00373515	0.00463919		0.0306133	0.0188266	0.16399	0.040489
Na		0.000499364	0.000316298	0	0.000192501		0.0425566	0		0.00507295	0	0.000927345	0.00512405
K		5.97402e-05	2.97311e-05	0	0.000253324		0.00309662	0		0.000578568	0	0	0.000569218
Ni		0.00107358	0	0	0.000758741		0	0.00102566		-	-	-	-
Cl		-	-	-	-		-	-		-	-	-	-
Total		2.98948	2.98696	2.99061	2.98841		2.98482	2.98716		4.0517	3.96934	3.96837	3.99074
FeO* = total Fe as FeO.							- not measured

## Sheet: BOC4
Representative analyses of the analysed Allende chondrule (BOC-04).
Analysis#		16	43		35		20	21	24	38	44
Mineral		Sp			Ne		Sod
SiO2		0.04	0.075		45.159		42.539	39.744	39.718	41.733	41.641
TiO2		0.261	0.281		0.075		0.061	0	0.033	0	0.041
Al2O3		70.33	70.415		31.145		31.311	30.643	28.53	31.347	31.449
Cr2O3		0.181	0.19		0.006		n.d.	n.d.	n.d.	n.d.	0.07
FeO *		0.879	0.625		1.775		1.792	1.144	0.908	0.938	1.008
MnO		0	0		0.012		0	0.014	0.027	0	0.01
MgO		27.71	26.747		1.968		1.45	0.896	0.337	0.559	0.849
CaO		n.d.	0.025		2.652		1.469	0.909	0.407	0.257	0.798
Na2O		n.d.	n.d.		15.539		15.139	16.067	21.947	17.625	15.416
K2O		n.d.	n.d.		1.605		0.015	0.015	n.d.	n.d.	0.043
NiO		-	-		-		n.d.	0.065	0.008	n.d.	0.006
Cl		-	-		-		6.609	7.107	6.652	6.248	7.216
Total		99.401	98.358		100.877		100.385	96.604	98.567	98.707	98.547
O=		4	4		4		12	12	12	12	12
Si		0.00095766	0.00181037		1.0693		2.97399	2.89704	2.90266	2.97292	2.95322
Ti		0.00470025	0.00510201		0.00133581		0.00320784	0	0.00181407	0	0.00218719
Al		1.98449	2.00321		0.86916		2.57992	2.63251	2.45735	2.63182	2.62868
Cr		0.00342614	0.00362605		0.000112326		0	0.000230525	0	0	0.00392507
Fe		0.0175993	0.0126166		0.0351487		0.104772	0.0697373	0.0554947	0.0558808	0.0597848
Mn		0	0		0.00024067		0	0.000864363	0.00167132	0	0.000600702
Mg		0.989	0.962474		0.0694686		0.151123	0.0973643	0.0367154	0.0593641	0.0897615
Ca		0.000102609	0.000646574		0.0672825		0.110039	0.0709937	0.0318696	0.019616	0.0606387
Na		0	0		0.713386		2.05209	2.27072	3.10979	2.43433	2.11979
K		0	0.000123175		0.0484829		0.00133784	0.00139487	0	0.000181757	0.00389046
Ni		-	-		0.00150475		0	0.00381135	0.000470307	0	0.000342301
Cl		-	-		-		0.78307	0.877973	0.823898	0.754321	0.867326
Total		3.00027	2.98961		2.87542		8.75955	8.92265	9.42174	8.92843	8.79014
FeO* = total Fe as FeO.						- not measured

## Sheet: BOC5
Representative analyses of the analysed Allende chondrule (BOC-05).
Analysis#		1	2	3	17		12	13		8	9	11		15		4	6	16	18	21
Mineral		Ol (core)					Opx			Al-rich Cpx				Sod		Mes
SiO2		42.284	42.659	42.617	42.753		57.672	57.79		47.514	50.012	51.098		40.484		48.486	51.781	51.842	50.918	40.16
TiO2		0.033	0.068	0.047	0.088		0.353	0.282		0.509	1.162	1.234		0.173		0.512	0.776	1.097	0.19	0.253
Al2O3		0.087	0.009	0.003	0.446		2.012	1.664		12.798	9.16	7.507		29.929		23.827	18.984	6.726	22.24	6.95
Cr2O3		0.117	0.04	0	0.021		0.393	0.527		0.067	0.433	0.387		0.166		0	0.368	0.375	0.204	0.728
FeO *		0.58	1.538	1.487	0.223		1.812	0.943		4.038	0.477	0.439		2.322		2.176	0.518	0.178	2.042	24.095
MnO		0	0	0.023	0.038		0.126	0		0.125	0.116	0		0.047		0.035	0.226	0.114	0	0.157
MgO		55.752	54.682	55.044	55.482		35.58	35.758		12.645	17.937	18.389		2.859		9.101	13.264	20.045	9.584	23.632
CaO		0.347	0.334	0.297	0.795		0.706	2.009		19.916	20.103	20.606		2.77		14.192	12.582	19.222	13.183	1.664
Na2O		0.021	n.d.	0	0.019		0.046	n.d.		2.667	0.03	n.d.		15.513		2.006	1.315	0.028	1.625	1.986
K2O		0.005	n.d.	n.d.	n.d.		n.d.	n.d.		0.185	n.d.	n.d.		0.028		0.018	0.033	0	0	0.217
NiO		n.d.	n.d.	0.021	n.d.		-	-		-	-	-		0.023		0.011	0.023	0.042	0.013	0.08
Cl		-	-	-	-		-	-		-	-	-		6.129		0	0.012	0.015	n.d.	n.d.
Total		99.226	99.33	99.539	99.865		98.7	98.973		100.464	99.43	99.66		100.443		100.364	99.882	99.684	99.999	99.922
O=		4	4	4	4		6	6		6	6	6		12		24	24	24	24	24
Si		1.00133	1.0116	1.00889	1.00441		1.97323	1.97191		1.72855	1.79326	1.82832		2.87444		6.74772	7.14464	7.38493	7.04801	6.28832
Ti		0.000587818	0.00121293	0.000836929	0.00155509		0.00908484	0.0072379		0.0139286	0.0313405	0.0332119		0.00923945		0.053597	0.0805381	0.117544	0.0197824	0.0297983
Al		0.00242814	0.000251534	8.37026e-05	0.0123491		0.0811329	0.0669181		0.548729	0.387098	0.316571		2.50449		3.9081	3.08712	1.12922	3.62816	1.28257
Cr		0.00219058	0.000749952	0	0.000390066		0.0106312	0.0142174		0.00192712	0.0122753	0.010948		0.00931866		0	0.0401451	0.0422349	0.0223254	0.0901254
Fe		0.0114864	0.0305008	0.0294394	0.00438132		0.0518474	0.0269093		0.122852	0.0143036	0.0131362		0.137876		0.253254	0.0597717	0.0212051	0.236378	3.15518
Mn		0	0	0.000461184	0.000756158		0.00365148	0		0.00385172	0.003523	0		0.00282653		0.00412566	0.0264121	0.0137548	0	0.0208222
Mg		1.9682	1.93309	1.94258	1.94314		1.81479	1.81893		0.685783	0.9588	0.98088		0.302617		1.88816	2.72831	4.25676	1.97765	5.51633
Ca		0.00880444	0.0084863	0.0075334	0.0200117		0.0258816	0.0734492		0.776309	0.772332	0.78998		0.210728		2.1162	1.86009	2.93384	1.95516	0.279169
Na		0.000964195	0	0	0.000865454		0.00305153	0		0.188117	0.00208563	0.000277495		2.13556		0.541275	0.351789	0.00773338	0.436109	0.60293
K		0.000151052	6.05044e-05	0	0		4.36487e-05	0		0.00858598	0.000182974	9.12931e-05		0.00253622		0.00319574	0.00580875	0	0	0.043347
Ni		0	0	0.000399911	0		-	-		-	-	-		0.00131365		0.00123145	0.00255282	0.00481278	0.00144751	0.0100766
Cl		-	-	-	-		-	-		-	-	-		0.737516		0	0.0028061	0.00362133	0	0
Total		2.99613	2.98595	2.99023	2.98786		3.97335	3.97957		4.07863	3.9752	3.97342		8.92847		15.5169	15.39	15.9157	15.325	17.3187
FeO* = total Fe as FeO.						- not measured

## Sheet: BOC6
Representative analyses of the analysed Allende chondrule (BOC-06).																				Representative analyses of the analysed Allende chondrule (BOC-06). (Continued)
Analysis#		8	9	26	27	41	75	76	80		28	29	37	54	73		18	19	32	Analysis#		44	50	83		36	42	78		2	4	6	34		14		20	21	31	43	63
Mineral		Ol (core)									Ol (rim)						Al-rich Cpx			Mineral		Al-rich Cpx				Pl				Ne					Sod		Mes
SiO2		42.621	42.787	42.773	40.639	42.061	39.661	42.074	42.482		41.983	31.554	41.404	30.006	39.954		45.097	49.792	42.928	SiO2		48.998	49.418	50.025		47.469	47.649	47.727		44.998	44.796	45.704	44.165		36.616		48.901	47.708	49.62	52.451	41.298
TiO2		0.103	0.053	0.13	0.213	0.062	0.063	0.079	0.076		0.086	0.088	0.089	0.032	0.08		0.4	4.5	1.405	TiO2		4.687	3.936	3.088		0.152	0.108	0.127		0.086	0.161	0.183	0.033		0.143		0.969	0.68	1.357	1.265	0.128
Al2O3		0.592	0.069	0.508	1.794	0.006	0.588	0.114	0.103		0.18	1.493	0.201	2.02	3.381		9.525	6.015	14.004	Al2O3		6.379	10.462	6.955		30.993	30.659	31.07		32.857	32.411	31.673	33.015		32.612		20.36	22.079	19.641	11.989	6.6
Cr2O3		0.608	0.088	0.32	0.844	0.014	0.278	0	0.112		0.076	0.587	0.13	0.607	0		1.193	1.249	0.266	Cr2O3		0.927	0.755	1.183		0	0	0		0.084	0.01	0.063	0		0.033		0.384	0.338	0.411	0.315	0.049
FeO *		2.178	1.227	1.399	3.841	4.32	15.473	6.08	3.05		2.141	29.624	7.456	25.175	13.857		1.716	0.981	6.011	FeO *		2.828	1.032	1.072		0.498	0.6	0.582		0.142	0.267	0.267	0.811		1.171		0.999	1.312	1.45	0.499	14.677
MnO		0.044	0	0.015	0.109	0.056	0.189	0	0		0	0.048	0.13	n.d.	0.007		0	0.072	0	MnO		0.226	0.245	0.026		0.002	n.d.	n.d.		n.d.	n.d.	n.d.	n.d.		0		0.022	n.d.	n.d.	n.d.	0.062
MgO		54.08	55.344	53.883	52.322	53.372	43.933	51.757	54.04		53.239	36.215	50.132	38.571	40.055		37.599	15.959	9.547	MgO		15.257	14.259	15.264		0.844	0.927	0.89		0.769	1.114	1.298	2.151		3.915		13.648	13.535	10.776	4.014	15.744
CaO		0.386	0.334	0.803	0.273	0.251	0.283	0.249	0.292		0.364	0.163	0.142	0.119	0.864		4.935	20.74	25.23	CaO		19.964	17.768	20.541		17.43	17.104	17.488		3.162	4.082	3.455	2.589		1.487		13.852	13.317	15.235	28.377	19.355
Na2O		0.186	0	0.086	0.07	0.012	0.037	0	0.029		0	0.013	n.d.	0.027	0.965		0.484	0.298	0.214	Na2O		0.428	1.477	0.348		1.749	1.764	1.749		15.408	15.735	16.003	15.333		16.65		0.964	1.259	1.519	0.903	0.106
K2O		0.005	0	0.007	0.013	0.011	0	0	0		0.002	0.006	n.d.	n.d.	0.171		n.d.	0.04	n.d.	K2O		n.d.	0.163	0.035		0.01	n.d.	0.01		1.565	1.365	1.417	1.833		0.286		0.015	0.022	0.076	0.037	0.009
NiO		0.029	0	0.038	0	0.021	0.035	0	0		0.082	0.091	0.029	3.868	0.075		-	-	-	NiO		-	-	-		-	-	-		-	-	-	-		0.029		0.038	n.d.	0.008	0.068	1.592
Cl		-	-	-	-	-	-	-	-		-	-	-	-	-		-	-	-	Cl		-	-	-		-	-	-		-	-	-	-		5.058		n.d.	n.d.	n.d.	n.d.	0.021
Total		100.832	99.902	99.962	100.118	100.186	100.54	100.353	100.184		98.153	99.882	99.713	100.425	99.409		100.949	99.646	99.605	Total		99.694	99.515	98.537		99.147	98.811	99.643		99.071	99.941	100.063	99.93		98		100.152	100.25	100.093	99.918	99.641
O=		4	4	4	4	4	4	4	4		4	4	4	4	4		6	6	6	O=		6	6	6		8	8	8		4	4	4	4		12		24	24	24	24	24
Si		1.00123	1.00812	1.00935	0.970809	1.00281	0.993096	1.00787	1.00639		1.01092	0.86643	1.0054	0.82104	1.00297		1.57025	1.80321	1.61145	Si		1.78628	1.77498	1.82527		2.20765	2.22163	2.209		1.06546	1.05655	1.07476	1.04243		2.6716		6.79455	6.63186	6.93893	7.57713	6.50044
Ti		0.00182003	0.000939307	0.00230751	0.00382737	0.00111189	0.00118658	0.00142346	0.00135427		0.00155765	0.00181757	0.00162561	0.000658621	0.00151059		0.0104764	0.122583	0.0396718	Ti		0.128527	0.106339	0.0847516		0.00531732	0.00378766	0.00442145		0.00153169	0.00285632	0.00323697	0.000585885		0.00784814		0.101274	0.0711021	0.14274	0.137458	0.0151549
Al		0.0163904	0.00191605	0.0141283	0.0505091	0.000168596	0.0173525	0.00321848	0.00287577		0.00510824	0.0483165	0.00575241	0.0651424	0.10003		0.39088	0.256732	0.619561	Al		0.274082	0.442873	0.299085		1.69879	1.68473	1.69484		0.916912	0.900949	0.877815	0.918409		2.80437		3.33408	3.61726	3.2371	2.04122	1.22437
Cr		0.0112925	0.0016393	0.0059703	0.0159407	0.000263902	0.00550361	0	0.00209775		0.00144688	0.0127436	0.00249584	0.0131317	0		0.0328426	0.0357623	0.00789465	Cr		0.0267194	0.0214403	0.0341272		0	0	0		0.00157253	0.000186478	0.00117131	0		0.00190366		0.0421841	0.037148	0.0454415	0.0359779	0.00609796
Fe		0.0427883	0.024177	0.0276086	0.0767346	0.086135	0.32401	0.121801	0.0604251		0.0431137	0.680266	0.151412	0.576079	0.290906		0.0499684	0.0297107	0.188703	Fe		0.0862198	0.0309987	0.0327109		0.0193689	0.0233951	0.0225274		0.00281182	0.00526646	0.00525079	0.0160083		0.071452		0.116082	0.152523	0.169574	0.0602847	1.932
Mn		0.000875485	0	0.000299811	0.00220548	0.00113087	0.00400843	0	0		0	0.00111636	0.00267379	0	0.000148837		0	0.00220854	0	Mn		0.00697855	0.00745348	0.000803525		7.87834e-05	0	0		0	0	0	0		0		0.00258911	0	0	0.000244718	0.00826591
Mg		1.8939	1.94393	1.89553	1.8633	1.89698	1.63994	1.84828	1.90847		1.91109	1.48244	1.81477	1.57335	1.49897		1.95167	0.861593	0.534259	Mg		0.829181	0.763494	0.830268		0.0585154	0.0644326	0.0614088		0.0271443	0.0391693	0.0455031	0.0756864		0.425835		2.82696	2.80486	2.24648	0.864444	3.69435
Ca		0.00971564	0.00843183	0.020303	0.00698758	0.0064119	0.00759254	0.0063909	0.00741169		0.00939112	0.00479557	0.00369453	0.0034888	0.0232388		0.184112	0.804766	1.01477	Ca		0.779816	0.683785	0.803038		0.86854	0.854453	0.867252		0.0802193	0.103157	0.087052	0.0654747		0.116248		2.06219	1.98346	2.28271	4.39228	3.26423
Na		0.00847169	0	0.00393474	0.00324217	0.000554712	0.00179629	0	0.001332		0	0.0006921	0	0.00143241	0.0469679		0.0326749	0.0209243	0.0155753	Na		0.0302525	0.102857	0.0246188		0.157709	0.159464	0.156952		0.707353	0.719556	0.729635	0.701685		2.35539		0.259697	0.339325	0.411851	0.252921	0.0323494
K		0.000149844	0	0.000210731	0.00039618	0.000334573	0	0	0		6.14372e-05	0.000210179	0	0	0.00547623		0	0.00184802	4.78889e-05	K		0	0.00746886	0.00162918		0.000593305	0.000118961	0.00059046		0.0472734	0.0410717	0.0425095	0.0551937		0.0266211		0.00265884	0.00390145	0.0135584	0.00681885	0.00180724
Ni		0.000548013	0	0.000721335	0	0.000402756	0.000704982	0	0		0.00158832	0.00201003	0.000566472	0.0851383	0.0015145		-	-	-	Ni		-	-	-		-	-	-		-	-	-	-		0.00170209		0.00424726	0	0.000899929	0.00790209	0.201576
Cl		-	-	-	-	-	-	-	-		-	-	-	-	-		-	-	-	Cl		-	-	-		-	-	-		-	-	-	-		0.625449		0.000706441	0	0.000473999	0	0.00560202
Total		2.98718	2.98916	2.98037	2.99396	2.9963	2.99519	2.98898	2.99036		2.98428	3.10084	2.98839	3.13946	2.97173		4.22288	3.93934	4.03193	Total		3.94806	3.94169	3.93631		5.01656	5.01201	5.017		2.85028	2.86876	2.86694	2.87547		9.10842		15.5472	15.6414	15.4898	15.3767	16.8862
FeO* = total Fe as FeO.							- not measured													FeO* = total Fe as FeO.										- not measured

## Sheet: BOC7
Representative analyses of the analysed Allende chondrule (BOC-07).
Analysis#		15		8	10	12	13		1		6	7	11
Mineral		Ol (core)		Opx					Fe-rich cpx		Al-rich Cpx
SiO2		41.816		57.244	58.888	55.447	58.606		50.178		54.575	54.974	54.381
TiO2		0.032		0.462	0.253	0.135	0.121		0		1.186	0.872	0.663
Al2O3		0.181		2.19	1.535	1.985	1.184		0.345		3.684	4.934	3.679
Cr2O3		0.413		0.548	0.371	0.539	0.515		0		0.532	0.593	0.531
FeO *		6.048		0.471	0.426	0.877	0.693		23.473		0.475	0.543	0.474
MnO		0.235		0.064	0.143	0.079	0.205		0.239		0.01	0.059	0
MgO		51.001		35.373	36.33	38.74	36.22		3.111		22.822	25.406	21.502
CaO		0.037		2.433	2.391	1.759	2.063		22.856		16.813	11.728	17.95
Na2O		0.022		n.d.	0.018	0.047	0.016		0.069		0.065	0.178	0.04
K2O		n.d.		n.d.	0.01	0.014	0.006		0.015		0.029	0.034	0.006
NiO		n.d.		-	-	-	-		-		-	-	-
Cl		-		-	-	-	-		-		-	-	-
Total		99.785		98.785	100.365	99.622	99.629		100.286		100.191	99.321	99.226
O=		4		6	6	6	6		6		6	6	6
Si		1.0086		1.95691	1.97907	1.89292	1.98577		2.0068		1.91929	1.91966	1.93496
Ti		0.00058057		0.0118799	0.00639563	0.00346671	0.00308391		0		0.0313733	0.0229041	0.0177446
Al		0.00514529		0.088235	0.0607992	0.0798677	0.0472819		0.0162617		0.152694	0.203059	0.15428
Cr		0.0078759		0.0148114	0.00985785	0.0145485	0.0137965		0		0.0147922	0.0163718	0.014938
Fe		0.121995		0.0134654	0.0119729	0.0250386	0.019637		0.785083		0.01397	0.015857	0.0141045
Mn		0.00480096		0.00185313	0.00407056	0.00228437	0.00588337		0.00809606		0.000297873	0.00174503	0
Mg		1.83385		1.80269	1.82015	1.97162	1.82955		0.185481		1.19649	1.32255	1.14054
Ca		0.000956203		0.0891161	0.0860966	0.0643418	0.0748961		0.979409		0.633526	0.438797	0.684323
Na		0.00102883		0	0.00117288	0.00311099	0.00105112		0.0053504		0.00443207	0.0120513	0.0027595
K		0		0.000174445	0.000428738	0.000609735	0.000259356		0.000765316		0.00130108	0.00151462	0.000272354
Ni		0		-	-	-	-		-		-	-	-
Cl		-		-	-	-	-		-		-	-	-
Total		2.98483		3.97914	3.98001	4.05781	3.98121		3.98725		3.96816	3.95451	3.96392
FeO* = total Fe as FeO.						- not measured

## Sheet: BOC8
Representative analyses of the analysed Allende chondrule (BOC-08).																					Representative analyses of the analysed Allende chondrule (BOC-08). (Continued)
Analysis#		8	78	79		14	15	17	26	46		22		4	30	32	34	49	50	51	Analysis#		96	99		95	42	78		101		33	39	44	65	67	91
Mineral		Ol (core)				Ol (rim)						Fe-rich Cpx		Al-rich Cpx							Mineral		Al-rich Cpx			Pl				Ne		Mes
SiO2		41.032	40.096	40.092		42.147	41.788	40.044	42.794	41.458		49.864		54.961	54.7	54.392	54.477	53.307	55.159	54.132	SiO2		52.914	52.045		45.99	47.649	47.727		45.685		50.825	51.567	48.881	45.106	49.185	52.995
TiO2		0.062	0.019	0.033		0.027	0.043	0.06	0.103	0		0.021		0.99	0.89	0.459	1.063	0.78	1.065	0.734	TiO2		0.676	1.123		0.081	0.108	0.127		0.042		0.206	0.959	0.344	0.228	1.66	0.611
Al2O3		0.813	1.54	1.789		0.01	0.031	0.207	0.121	0.019		1.127		6.015	4.836	7.51	7.14	8.621	6.736	12.103	Al2O3		12.091	11.148		32.849	30.659	31.07		31.826		19.216	15.041	26.099	19.197	12.902	13.926
Cr2O3		0.954	0.225	0.382		0.098	0.071	0.926	0.275	0		0		0.617	0.71	0.606	0.503	0.457	0.608	0.47	Cr2O3		0.375	0.396		0	0	0		0.081		0.25	0.326	0.106	0.073	0.374	0.391
FeO *		4.595	9.47	10.433		3.216	3.858	9.791	2.053	8.627		20.381		0.71	1.561	0.653	0.614	0.647	0.594	0.626	FeO *		0.545	0.382		0.164	0.6	0.582		0.305		0.487	0.356	0.299	2.479	2.058	0.558
MnO		0.101	0.056	0.175		0	0.054	0	0.106	0.073		0.568		n.d.	n.d.	n.d.	0.027	0	0	0.032	MnO		n.d.	n.d.		0	0	0		0.061		n.d.	n.d.	n.d.	n.d.	n.d.	n.d.
MgO		51.169	47.401	46.849		54.252	53.373	47.93	54.745	49.961		4.297		23.409	29.016	23.009	23.169	26.808	25.203	21.579	MgO		19.058	17.333		0.689	0.927	0.89		0.775		11.979	13.69	7.78	22.646	18.608	19.312
CaO		0.288	0.285	0.7		0.067	0.135	0.198	0.149	0.191		22.707		13.558	7.518	12.21	12.666	8.671	10.624	9.372	CaO		13.869	17.567		18.214	17.104	17.488		2.743		15.742	17.719	15.855	9.436	11.191	11.897
Na2O		0.102	0.095	0.072		0.014	0.035	0.013	0.025	0.021		0.156		0.368	0.286	0.288	0.321	0.326	0.215	0.635	Na2O		0.58	0.257		1.077	1.764	1.749		16.542		0.868	0.515	0.955	1.125	2.897	0.574
K2O		0.044	0.017	0.013		n.d.	n.d.	0.009	n.d.	0		0.01		0.014	0.027	n.d.	0.01	0.01	0.027	0.002	K2O		0.019	n.d.		0.029	0.002	0.01		1.67		0.016	n.d.	n.d.	0.087	0.598	0.011
NiO		n.d.	0.051	0.044		0.038	0.04	0.092	0.029	0.078		-		-	-	-	-	-	-	-	NiO		-	-		-	-	-		-		n.d.	0	0.01	0.08	n.d.	0.04
Cl		-	-	-		-	-	-	-	-		-		-	-	-	-	-	-	-	Cl		-	-		-	-	-		-		0.015	n.d.	n.d.	0.023	0.015	n.d.
Total		99.16	99.255	100.582		99.869	99.428	99.27	100.4	100.428		99.131		100.642	99.544	99.127	99.99	99.627	100.231	99.685	Total		100.127	100.251		99.093	98.813	99.643		99.73		99.604	100.173	100.329	100.48	99.488	100.315
O=		4	4	4		4	4	4	4	4		6		6	6	6	6	6	6	6	O=		6	6		8	8	8		4		24	24	24	24	24	24
Si		0.992355	0.988256	0.981202		1.00258	1.00182	0.991235	1.00746	1.00486		1.99212		1.90393	1.89666	1.90061	1.89203	1.84147	1.89952	1.85914	Si		1.83553	1.82414		2.14011	2.22163	2.209		1.07907		7.08212	7.20611	6.72978	6.30222	6.99367	7.28491
Ti		0.00112789	0.00035225	0.000607497		0.000483112	0.000775421	0.00111717	0.00182394	0		0.000631068		0.0257965	0.0232124	0.0120642	0.0277702	0.0202677	0.0275872	0.018962	Ti		0.0176387	0.0296066		0.00283522	0.00378766	0.00442145		0.000746197		0.0215915	0.100804	0.0356245	0.023962	0.177546	0.0631771
Al		0.0231735	0.0447348	0.0516021		0.000280356	0.000875906	0.00603901	0.00335727	0.000542761		0.0530649		0.245577	0.197626	0.309282	0.29226	0.350989	0.273392	0.489899	Al		0.494321	0.460503		1.80157	1.68473	1.69484		0.885958		3.15577	2.4772	4.23488	3.16118	2.16215	2.25617
Cr		0.0182418	0.00438456	0.00739161		0.00184313	0.00134578	0.0181228	0.00511861	0		0		0.0168988	0.0194641	0.0167419	0.0138121	0.0124816	0.0165541	0.0127623	Cr		0.0102848	0.0109736		0	0	0		0.00151264		0.0275423	0.0360182	0.0115383	0.00806412	0.0420455	0.0424953
Fe		0.0929364	0.195198	0.213533		0.0639774	0.0773496	0.202685	0.0404193	0.17487		0.68094		0.0205689	0.0452648	0.0190822	0.0178336	0.0186913	0.0171069	0.0179799	Fe		0.0158104	0.0111969		0.00638223	0.0233951	0.0225274		0.00602464		0.0567506	0.041604	0.0344261	0.289662	0.244723	0.0641475
Mn		0.00206895	0.00116907	0.00362764		0	0.00109653	0	0.00211366	0.00149867		0.0192203		0	0	0	0.000794263	0	0	0.000930878	Mn		0	0		0	0	0		0.00122037		0	0	0	0	0	0
Mg		1.84484	1.74166	1.70927		1.92388	1.90752	1.7687	1.92131	1.80525		0.255918		1.20889	1.49985	1.19857	1.19959	1.38055	1.29387	1.10484	Mg		0.985545	0.905653		0.0477969	0.0644326	0.0614088		0.0272888		2.48837	2.85194	1.59679	4.71693	3.9444	3.95754
Ca		0.00746294	0.00752638	0.0183557		0.00170766	0.00346774	0.00525143	0.00375841	0.00496027		0.971987		0.503229	0.279304	0.457138	0.471334	0.320939	0.392003	0.344876	Ca		0.515476	0.659706		0.908136	0.854453	0.867252		0.0694183		2.35028	2.65302	2.33884	1.4126	1.70496	1.75227
Na		0.0047829	0.00453982	0.00341648		0.000645697	0.00162688	0.00062392	0.00114112	0.00098688		0.0120837		0.0247167	0.0192271	0.0195118	0.0216156	0.0218345	0.0143553	0.0422842	Na		0.039009	0.0174646		0.0971705	0.159464	0.156952		0.757547		0.234505	0.139535	0.254924	0.30476	0.79867	0.152985
K		0.00135755	0.000534535	0.000405884		0.000121387	0	0.000284211	0	0		0.000509666		0.000618704	0.00119433	0	0.000443072	0.000440696	0.00118618	8.76286e-05	K		0.000840819	0		0.00172159	0.000118961	0.00059046		0.0503211		0.00284423	0	0	0.0155073	0.108476	0.00192904
Ni		7.78192e-05	0.00101116	0.000866235		0.000727144	0.000771404	0.00183193	0.000549193	0.00152081		-		-	-	-	-	-	-	-	Ni		-	-		-	-	-		-		0	0	0.0011075	0.00899149	0	0.00442315
Cl		-	-	-		-	-	-	-	-		-		-	-	-	-	-	-	-	Cl		-	-		-	-	-		-		0.00354233	0	0.000933324	0.00544627	0.00361473	0
Total		2.98843	2.98937	2.99027		2.99625	2.99666	2.9959	2.98705	2.9945		3.98647		3.95023	3.9818	3.933	3.93748	3.96767	3.93558	3.89176	Total		3.91445	3.91925		5.00572	5.01201	5.017		2.8791		15.4233	15.5062	15.2388	16.2493	16.1803	15.58
FeO* = total Fe as FeO.								- not measured													FeO* = total Fe as FeO.										- not measured

## Sheet: BOC9
Representative analyses of the analysed Allende chondrule (BOC-09).
Analysis#		8	9	41		30		5	14	17	20	24	29	31
Mineral		Ol (core)				Ol (rim)		Mes
SiO2		42.125	41.057	41.474		38.399		45.448	46.608	48.193	47.776	47.407	51.015	44.258
TiO2		0.064	0.611	0.125		0.211		1.051	1.23	1.434	0.924	1.637	1.087	n.d.
Al2O3		0.293	4.514	0.322		1.692		23.827	24.494	22.178	21.275	26.208	23.041	7.17
Cr2O3		0.101	0.248	0.322		0.534		0.595	0.544	0.464	0.473	0.528	0.416	0
FeO *		0.37	9.291	4.908		20.7		1.618	1.097	1.153	1.682	0.78	1.238	7.652
MnO		0.121	0.036	0.133		0		0.032	0.032	0	0.071	0.071	0.017	0.019
MgO		55.469	40.281	53.016		37.441		8.924	9.44	7.045	10.784	5.106	6.431	25.781
CaO		0.473	2.952	0.257		0.497		6.576	7.714	11.07	10.003	7.49	14.44	14.249
Na2O		0.013	0.606	0.016		0.048		10.194	7.977	8.38	6.626	9.581	2.404	0.259
K2O		0.005	0.076	0.004		0.032		1.212	1.237	0.886	0.615	1.348	0.029	0
NiO		n.d.	n.d.	0.051		0.012		0.037	0.055	n.d.	0.049	n.d.	0.112	0.084
Cl		-	-	-		-		0.024	0.012	0.019	n.d.	0.011	0.023	0.035
Total		99.034	99.672	100.628		99.566		99.538	100.44	100.822	100.278	100.167	100.253	99.507
O=		4	4	4		4		24	24	24	24	24	24	24
Si		0.99935	1.0078	0.989402		0.994304		6.50182	6.54596	6.78974	6.73572	6.66326	7.0577	6.5695
Ti		0.00114205	0.0112813	0.00224304		0.00410971		0.113097	0.129941	0.151967	0.0979887	0.17307	0.113116	0
Al		0.00819221	0.130589	0.00905334		0.0516364		4.0174	4.05442	3.68254	3.53509	4.34144	3.75684	1.25434
Cr		0.00189441	0.004813	0.00607334		0.0109324		0.0672995	0.0604069	0.0516847	0.0527243	0.058675	0.0455023	0
Fe		0.00734066	0.190725	0.0979168		0.448256		0.193577	0.128847	0.135848	0.198315	0.0916842	0.143233	0.949886
Mn		0.00243135	0.000748474	0.00268741		0		0.00387753	0.0038067	0	0.00847848	0.00845255	0.00199205	0.0023888
Mg		1.96172	1.474	1.88544		1.44529		1.90322	1.97649	1.47965	2.26654	1.06988	1.32633	5.70491
Ca		0.012023	0.0776388	0.00656906		0.0137889		1.00799	1.16082	1.67105	1.51105	1.12797	2.14045	2.2662
Na		0.000597953	0.0288409	0.000740054		0.00240983		2.82756	2.1722	2.28907	1.81123	2.61097	0.644832	0.0745395
K		0.000151323	0.00237991	0.000121735		0.00105708		0.221198	0.221637	0.159243	0.110614	0.241709	0.00511826	0
Ni		0	0	0.000978699		0.000249956		0.00425798	0.00621381	0	0.00555716	0.000226129	0.0124642	0.01003
Cl		-	-	-		-		0.00581893	0.00285631	0.00453664	0	0.00262028	0.00539269	0.00880482
Total		2.99484	2.92882	3.00122		2.97204		16.8671	16.4636	16.4153	16.3333	16.39	15.253	16.8406
FeO* = total Fe as FeO.							- not measured

## Sheet: BOC10
Representative analyses of the analysed Allende chondrule (BOC-10).																					Representative analyses of the analysed Allende chondrule (BOC-10). (Continued)
Analysis#		21	24	41	45	55		5	7	17	28	29	51		1	15	33	35	43		Analysis#		46	10	11	30	39	42		40	56	42	78		4	6	15	16	18	19
Mineral		Ol (core)						Ol (rim)							Opx						Mineral		Cpx							Pl					Sod
SiO2		40.988	40.948	39.484	41.786	41.629		41.473	41.423	40.915	40.489	41.549	34.662		57.085	59.32	56.786	58.284	58.283		SiO2		58.318	54.703	53.415	54.104	55.228	54.891		46.68	46.246	47.649	47.727		42.518	39.741	41.105	40.719	40.12	40.595
TiO2		0.173	0.145	0.09	0.072	0.113		0.039	0.047	0.078	0.083	0.069	0.1		0.376	0.371	0.598	0.585	0.533		TiO2		0.625	1.055	1.924	1.178	1.49	1.163		0.035	0.147	0.108	0.127		n.d.	n.d.	n.d.	n.d.	0.028	n.d.
Al2O3		0.69	0.076	1.285	0.049	0.039		0.041	0.005	0.015	0.022	0.017	3.715		2.117	0.963	1.522	1.339	1.561		Al2O3		0.975	2.035	3.666	2.068	1.93	2.519		31.576	31.65	30.659	31.07		33.067	28.828	30.132	32.646	31.827	32.413
Cr2O3		0.418	0.145	0.288	0.071	0.068		0.048	0	0	0	0.03	0.324		0.349	0.523	0.628	0.476	0.403		Cr2O3		0.551	0.32	0.477	0.286	0.26	0.496		0	0.021	0	0		0	0	0.099	0.025	0	0
FeO *		6.014	7.854	12.927	5.888	7.694		9.064	9.404	8.682	11.888	7.71	27.352		0.814	0.716	1.635	0.629	0.388		FeO *		0.556	0.433	0.513	0.482	0.362	0.476		1.221	0.957	0.6	0.582		0.566	2.792	1.583	0.261	0.44	0.555
MnO		0.177	0.167	0.095	0.103	0.017		0	0.098	0.015	0.137	0.251	0.201		0.042	0.165	0.04	0.099	0.131		MnO		0.185	n.d.	0.062	n.d.	n.d.	n.d.		n.d.	n.d.	0	0		n.d.	0.027	n.d.	n.d.	n.d.	n.d.
MgO		51.051	50.218	45.725	51.667	50.611		49.344	49.15	49.808	47.391	50.145	32.557		35.828	35.898	33.001	35.421	36.2		MgO		35.114	21.468	19.855	20.771	21.247	23.657		1.152	1.151	0.927	0.89		0.956	4.924	2.386	0	0.121	0.256
CaO		0.295	0.207	0.213	0.172	0.243		0.2	0.153	0.219	0.231	0.238	0.165		1.853	2.571	4.825	2.716	2.544		CaO		3.171	20.271	19.588	20.233	20.277	16.725		16.753	17.023	17.104	17.488		1.343	0.129	0.185	0.089	0.438	2.572
Na2O		0.049	0	n.d.	n.d.	0.006		0.019	0.008	0	0.013	0	0.05		0.035	0.043	0.063	0.014	0.033		Na2O		0.02	n.d.	n.d.	0.011	0.021	0.044		1.721	1.535	1.764	1.749		14.11	15.479	19.443	20.723	19.653	17.843
K2O		n.d.	0.011	n.d.	n.d.	0.013		n.d.	0.017	0	0.015	0	0		0.01	n.d.	0.012	0.008	0		K2O		0.01	0.009	0.005	0.037	0.014	0.005		n.d.	0.006	0.002	0.01		0.045	0.037	0.01	0.034	0.015	0.033
NiO		0.015	0.075	0.087	n.d.	0.05		0.052	0.025	0.083	n.d.	0.025	0.056		-	-	-	-	-		NiO		-	-	-	-	-	-		-	-	-	-		0.063	0.082	0	0.086	0.021	0.029
Cl		-	-	-	-	-		-	-	-	-	-	-		-	-	-	-	-		Cl		-	-	-	-	-	-		-	-	-	-		5.518	5.809	5.908	6.315	6.032	5.242
Total		99.87	99.846	100.194	99.808	100.483		100.28	100.33	99.815	100.269	100.034	99.182		98.509	100.57	99.11	99.571	100.076		Total		99.525	100.294	99.505	99.17	100.829	99.976		99.138	98.736	98.813	99.643		98.186	97.848	100.851	100.898	98.695	99.538
O=		4	4	4	4	4		4	4	4	4	4	4		6	6	6	6	6		O=		6	6	6	6	6	6		8	8	8	8		12	12	12	12	12	12
Si		0.989897	0.997015	0.980422	1.00644	1.00438		1.00816	1.00819	0.999142	0.999001	1.0073	0.934876		1.9557	1.99272	1.96091	1.9786	1.96645		Si		1.98366	1.94137	1.90942	1.9432	1.94718	1.9346		2.17629	2.16383	2.22163	2.209		3.00231	2.88636	2.90935	2.86791	2.88517	2.89415
Ti		0.00314274	0.00265562	0.00168099	0.00130442	0.00205073		0.000713114	0.000860452	0.00143274	0.00154041	0.00125828	0.00202876		0.00968939	0.00937451	0.0155327	0.0149381	0.0135269		Ti		0.0159909	0.028163	0.0517337	0.0318247	0.039515	0.0308319		0.00122739	0.00517362	0.00378766	0.00442145		0	0	0	0	0.0015146	0
Al		0.0196399	0.00218091	0.0376055	0.00139094	0.00110898		0.00117464	0.000143425	0.00043171	0.000639746	0.000485741	0.118091		0.0854784	0.0381265	0.0619424	0.053573	0.0620727		Al		0.0390863	0.0851173	0.15445	0.0875378	0.0801973	0.104635		1.735	1.74533	1.68473	1.69484		2.75191	2.46764	2.51353	2.70991	2.69751	2.72347
Cr		0.0079815	0.00279133	0.00565405	0.00135204	0.00129714		0.000922531	0	0	0	0.000575037	0.00690908		0.00945322	0.0138906	0.0171456	0.0127759	0.0107503		Cr		0.014818	0.00897888	0.0134813	0.00812139	0.0072476	0.0138213		0	0.000776859	0	0		0	0	0.00554001	0.00139214	0	0
Fe		0.121465	0.159925	0.268439	0.118598	0.155242		0.184264	0.191411	0.177305	0.245298	0.156318	0.616944		0.0233217	0.0201147	0.0472162	0.0178573	0.0109479		Fe		0.0158159	0.0128511	0.015336	0.0144775	0.0106736	0.0140299		0.0476055	0.0374469	0.0233951	0.0225274		0.0334238	0.169583	0.0936996	0.0153732	0.0264618	0.03309
Mn		0.00362069	0.00344406	0.00199802	0.00210125	0.000347405		0	0.00202027	0.000310257	0.00286309	0.00515416	0.00459179		0.00121875	0.00469477	0.00116994	0.00284662	0.00374368		Mn		0.00532992	0	0.00187722	0	5.97257e-05	0		0	0	0	0		0	0.00166097	0	0	0	0
Mg		1.838	1.82279	1.6926	1.85514	1.82035		1.78817	1.78333	1.81323	1.74314	1.81232	1.30904		1.82983	1.79773	1.69884	1.79258	1.82079		Mg		1.78054	1.13579	1.05808	1.11213	1.11674	1.24297		0.0800658	0.0802846	0.0644326	0.0614088		0.100635	0.533136	0.251756	0	0.0129719	0.027208
Ca		0.00763358	0.00540023	0.00566689	0.00443871	0.00628175		0.00520916	0.00398992	0.0057301	0.0061068	0.00618229	0.00476823		0.0680186	0.0925381	0.17852	0.0987899	0.091967		Ca		0.115567	0.770807	0.750244	0.778615	0.76599	0.631583		0.836858	0.853409	0.854453	0.867252		0.101609	0.0100386	0.0140296	0.00671633	0.0337488	0.196468
Na		0.00229444	0	0	0.000186794	0.000280672		0.000895499	0.000377516	0	0.000621897	0	0.00261467		0.00232484	0.00280066	0.00421798	0.000921476	0.00215875		Na		0.00131899	0.000275235	0.000277233	0.000765999	0.00143553	0.0030067		0.155565	0.139252	0.159464	0.156952		1.93177	2.17972	2.66815	2.82988	2.74023	2.46639
K		0	0.000341681	0	6.14531e-05	0.000400132		0	0.000527845	0	0.000472148	0	0		0.000437057	0	0.000528637	0.000346464	0		K		0.000433932	0.000407473	0.000228017	0.00169531	0.000629699	0.000224812		0	0.000358144	0.000118961	0.00059046		0.00405372	0.00342825	0.000902941	0.00305496	0.00137613	0.00300138
Ni		0.000291412	0.00146897	0.00173777	0	0.000970407		0.00101684	0.000489465	0.00163044	0	0.000487553	0.00121498		-	-	-	-	-		Ni		-	-	-	-	-	-		-	-	-	-		0.00357854	0.0047908	0	0.00487247	0.00121482	0.00166314
Cl		-	-	-	-	-		-	-	-	-	-	-		-	-	-	-	-		Cl		-	-	-	-	-	-		-	-	-	-		0.660353	0.715031	0.708684	0.753796	0.735164	0.633369
Total		2.99397	2.99801	2.9958	2.99101	2.99271		2.99052	2.99133	2.99921	2.99969	2.99009	3.00108		3.98547	3.97199	3.98603	3.97323	3.98241		Total		3.97256	3.98376	3.95513	3.97837	3.96967	3.9757		5.03261	5.02586	5.01201	5.017		8.58965	8.97139	9.16564	9.1929	9.13536	8.97881
FeO* = total Fe as FeO.								- not measured													FeO* = total Fe as FeO.								- not measured

[truncated: 27 more sheets: BOC11, POC1, POC2, POC3, POC4, POC5, POC6, POC7, POC8, POC9, POC10, POC11, POC12, POC13, POC14, POC15, POC16, POC17, POC18, POC19 …]
