# Supplementary material for: In Situ Argon Isotope Analyses of Chondrule-Forming Materials in the Allende Meteorite: A Preliminary Study for 40Ar/39Ar Dating Based on Cosmogenic 39Ar
Source: MDPI journal article supplement (doi:10.3390/min13010031), 2022-12-25
Supplement: s1 [file s1 › ST2.xls]

## Sheet: 0615B4
Bulk chondrules (Y040615B4)
TEMP.(ºC)	CUM39	AGE(Ma)	ERROR	Ca/K	ERROR
597	0.242	2139.5	92.87	4.252	0.746
710	0.351	3191.43	104.94	4.457	0.563
800	0.477	3010.66	55.86	2.042	0.342
894	0.587	3085.63	64.26	4.212	0.566
937	0.651	3250.7	110.65	4.946	1.142
990	0.706	2955.1	66.35	4.168	1.016
1041	0.798	3564.14	121.42	13.403	1.008
1069	0.918	3341.23	84.71	22.752	0.898
1300	1	3956.57	213.92	207.296	21.763
TOTAL	-	3066.08	39.06	20.191	0.479
TEMP.	35Ar	ERROR	36Ar	ERROR	37Ar	ERROR	38Ar	ERROR	39Ar	ERROR	40Ar	ERROR
(ºC)	(ccSTP)	(ccSTP)	(ccSTP)	(ccSTP)	(ccSTP)	(ccSTP)	(ccSTP)	(ccSTP)	(ccSTP)	(ccSTP)	(ccSTP)	(ccSTP)
BLANK	3.0732e-13	7.8103e-15	2.4375e-14	1.4899e-15	1.0893e-13	5.738e-15	9.774e-15	2.5019e-15	4.4703e-14	3.3761e-15	1.7313e-12	1.4479e-13
597	1.0195e-13	1.4943e-14	7.2351e-14	1.6123e-14	2.1917e-13	3.6627e-14	8.9499e-13	2.4644e-14	2.9307e-12	1.4665e-13	1.6697e-09	8.8719e-11
710	3.718e-14	1.5033e-14	2.4099e-13	7.7636e-15	1.0443e-13	1.2419e-14	2.0061e-12	4.7692e-14	1.3325e-12	5.3368e-14	1.6747e-09	9.123e-11
800	8.5355e-14	1.4061e-14	4.2259e-13	1.3771e-14	5.5083e-14	9.0455e-15	4.3822e-12	8.7966e-14	1.5285e-12	4.5143e-14	1.7587e-09	3.7138e-11
BLANK	3.4455e-13	1.1557e-14	3.2531e-14	2.6222e-15	1.3426e-13	7.1432e-15	1.9167e-14	2.4654e-15	5.1015e-14	1.6919e-14	1.9417e-12	4.5493e-13
894	7.1778e-15	1.4846e-14	4.638e-13	1.7158e-14	9.8729e-14	1.2989e-14	3.9894e-12	7.6545e-14	1.3325e-12	3.0134e-14	1.6307e-09	5.3993e-11
937	1.8703e-14	1.8895e-14	2.1882e-13	1.2413e-14	6.7372e-14	1.5315e-14	2.1469e-12	7.7268e-14	7.752e-13	2.3063e-14	1.0343e-09	6.4529e-11
990	1.9078e-14	1.4445e-14	2.3046e-13	8.189e-15	4.9113e-14	1.1785e-14	2.7559e-12	4.2562e-14	6.6978e-13	2.2531e-14	7.5494e-10	2.0254e-11
BLANK	3.2443e-13	1.3934e-14	5.0736e-14	2.0848e-15	1.3987e-13	3.9835e-15	3.1811e-14	3.3329e-15	1.0948e-13	9.2626e-15	2.2449e-12	3.3619e-13
1041	3.1211e-14	2.3127e-14	4.0579e-13	1.4146e-14	2.5768e-13	1.7913e-14	3.5465e-12	1.2272e-13	1.1079e-12	2.7138e-14	1.7987e-09	1.2367e-10
1069	4.3923e-14	1.4484e-14	2.1892e-13	2.2985e-14	5.6837e-13	1.7082e-14	1.2472e-12	2.2348e-14	1.4594e-12	3.4077e-14	1.9505e-09	9.3417e-11
1300	3.0943e-13	2.2282e-13	9.0698e-13	3.2498e-14	2.789e-12	4.6508e-14	1.6711e-12	4.0589e-14	9.9629e-13	7.6966e-14	1.7609e-09	1.2752e-10
TOTAL	6.54e-13	2.2766e-13	3.1807e-12	5.3079e-14	4.2089e-12	3.955e-12	2.264e-11	2.0458e-13	1.2133e-11	1.9045e-13	1.4033e-08	2.5593e-10

## Sheet: 0615B6
Bulk chondrules (Y040615B6)
TEMP.(ºC)	CUM39	AGE(Ma)	ERROR	Ca/K	ERROR
508	0.065	1320.47	270.71	18.798	6.052
591	0.182	2507.67	212.95	8.541	2.035
701	0.331	2708.42	134.46	0	0
795	0.403	3124.51	139.8	0	0
894	0.455	3611.4	204.49	0	0
943	0.503	3427.95	239.69	1.728	4.123
988	0.529	4544.66	563.99	13.019	9.628
1033	0.635	3407.02	166.77	4.762	2.061
1076	0.775	3543.35	96.04	7.998	2.051
1063	0.833	3934.2	235.96	4.46	2.56
1044	0.839	3831.88	915.3	20.101	34.495
1040	0.851	2928.16	570.83	38.58	25.314
1200	0.967	3151.83	71.07	23.738	3.044
1300	1	2281.03	207.44	27.17	5.469
TOTAL	-	3178.33	58.07	8.65	0.879
TEMP.	35Ar	ERROR	36Ar	ERROR	37Ar	ERROR	38Ar	ERROR	39Ar	ERROR	40Ar	ERROR
(ºC)	(ccSTP)	(ccSTP)	(ccSTP)	(ccSTP)	(ccSTP)	(ccSTP)	(ccSTP)	(ccSTP)	(ccSTP)	(ccSTP)	(ccSTP)	(ccSTP)
BLANK	3.4619e-13	1.491e-14	3.3636e-14	1.7265e-15	1.4202e-13	3.6234e-15	1.1873e-14	3.4168e-15	6.2862e-14	5.9379e-15	2.9859e-12	5.2423e-13
508	-8.3169e-15	1.8274e-14	2.7426e-13	7.9506e-15	5.3808e-14	9.8316e-15	1.0594e-13	8.1613e-15	1.6959e-13	4.3119e-14	1.2489e-10	4.9238e-12
591	2.4367e-14	1.8338e-14	4.9899e-14	5.6706e-15	4.4995e-14	8.2176e-15	7.9335e-14	7.5406e-15	3.0745e-13	4.5592e-14	2.4246e-10	1.0288e-11
701	3.3845e-14	1.6689e-14	3.6108e-14	2.916e-15	-1.2191e-14	6.841e-15	1.8368e-13	8.1137e-15	3.8875e-13	3.1363e-14	3.4836e-10	1.7308e-11
BLANK	3.4758e-13	8.9171e-15	5.7006e-14	3.273e-15	1.5885e-13	7.861e-15	2.1802e-14	2.734e-15	1.3707e-13	1.1222e-14	2.4991e-12	2.104e-13
795	-3.2097e-15	1.2482e-14	2.1691e-14	4.856e-15	-1.726e-14	1.0618e-14	2.3659e-13	1.013e-14	1.8774e-13	1.5716e-14	2.2393e-10	9.1244e-12
894	1.9356e-14	1.2376e-14	8.3268e-14	4.8335e-15	-9.3623e-15	1.1913e-14	2.6405e-13	1.0983e-14	1.3693e-13	1.4202e-14	2.4293e-10	1.7362e-11
943	-4.2703e-15	1.5646e-14	3.2609e-14	5.6279e-15	3.7095e-15	8.8132e-15	2.6545e-13	1.2746e-14	1.2402e-13	1.6819e-14	1.8482e-10	1.3271e-11
BLANK	3.5228e-13	1.2663e-14	5.6981e-14	2.9279e-15	1.5011e-13	8.0663e-15	3.3803e-14	1.6459e-15	1.0902e-13	8.8937e-15	1.4755e-12	2.3574e-13
988	-1.0831e-14	1.5489e-14	4.8629e-14	5.4931e-15	1.5332e-14	9.9145e-15	2.8471e-13	4.6459e-15	6.9181e-14	2.2737e-14	2.0725e-10	1.0645e-11
1033	-5.585e-15	1.8507e-14	5.7841e-14	6.0697e-15	2.2685e-14	9.6266e-15	3.6908e-13	1.6621e-14	2.7647e-13	1.8716e-14	4.0052e-10	3.2386e-11
1076	1.2803e-14	1.4869e-14	7.0197e-14	6.1299e-15	5.0284e-14	1.2473e-14	1.5481e-13	6.3612e-15	3.6662e-13	1.8878e-14	5.7348e-10	1.7866e-11
BLANK	3.4803e-13	9.0439e-15	3.3793e-14	2.9583e-15	1.4032e-13	3.9188e-15	2.1717e-14	3.2725e-15	9.3338e-14	7.1764e-15	2.4877e-12	4.143e-13
1063	7.458e-15	1.1709e-14	6.6279e-14	7.463e-15	1.16e-14	6.4076e-15	6.0227e-14	6.4187e-15	1.5085e-13	2.1244e-14	3.1261e-10	1.1416e-11
1044	-2.2569e-14	1.3703e-14	5.9606e-15	4.0509e-15	5.3441e-15	8.3995e-15	-6.313e-15	4.7547e-15	1.5781e-14	8.711e-15	2.9833e-11	1.9039e-12
1040	9.067e-15	1.1289e-14	1.0924e-14	5.3283e-15	1.9973e-14	1.0027e-14	-2.612e-14	4.8874e-15	3.1556e-14	1.1492e-14	3.335e-11	1.7462e-12
1200	1.2462e-14	1.7114e-14	2.1322e-13	9.326e-15	1.2092e-13	1.4173e-14	1.3833e-13	9.0948e-15	3.0396e-13	1.2107e-14	4.0862e-10	7.2271e-12
1300	-1.4613e-14	1.6286e-14	9.2494e-14	4.8658e-15	3.8842e-14	6.1292e-15	6.4342e-14	6.9378e-15	8.5732e-14	9.5844e-15	7.92e-11	5.5374e-12
TOTAL	1.1936e-13	5.7589e-14	1.0634e-12	2.234e-14	3.8749e-13	2.1124e-12	2.2065e-12	3.3699e-14	2.6146e-12	8.8203e-14	3.4123e-09	5.197e-11

## Sheet: 0615B7
Bulk chondrules (Y040615B7)
TEMP.(ºC)	CUM39	AGE(Ma)	ERROR	Ca/K	ERROR
519	0.021	2261.74	225.5	17.572	4.739
598	0.08	2235.48	90.98	0.852	0.865
708	0.141	2746.26	79.8	0	0
795	0.199	3337.53	154.52	0	0
893	0.261	3495.72	86.39	0	0
939	0.299	3243.5	114.17	0	0
980	0.353	3143.48	79.22	1.316	0.931
1031	0.463	3352	155.12	4.22	0.467
958	0.856	3287.75	125.25	9.828	0.301
1500	1	3353.19	78.79	25.753	1.107
TOTAL	-	3217.51	58.51	8.417	0.249
TEMP.	35Ar	ERROR	36Ar	ERROR	37Ar	ERROR	38Ar	ERROR	39Ar	ERROR	40Ar	ERROR
(ºC)	(ccSTP)	(ccSTP)	(ccSTP)	(ccSTP)	(ccSTP)	(ccSTP)	(ccSTP)	(ccSTP)	(ccSTP)	(ccSTP)	(ccSTP)	(ccSTP)
BLANK	3.2845e-13	7.4941e-15	3.7047e-14	3.2142e-15	1.488e-13	7.5097e-15	1.3076e-14	2.6823e-15	6.724e-14	6.2417e-15	2.4778e-12	1.0568e-13
519	3.88e-14	1.1373e-14	6.0097e-14	5.5236e-15	7.0889e-14	1.4743e-14	6.2092e-14	5.5386e-15	2.4335e-13	3.9074e-14	1.6519e-10	8.4054e-12
598	2.8717e-14	1.1983e-14	2.5647e-14	5.5125e-15	9.8372e-15	9.961e-15	8.4249e-14	6.1245e-15	6.7952e-13	3.5228e-14	4.2214e-10	1.9765e-11
708	6.0062e-14	1.3164e-14	6.6787e-14	6.4772e-15	-1.4171e-14	1.0951e-14	3.5619e-13	1.3219e-14	7.1004e-13	2.6019e-14	6.5334e-10	2.6839e-11
BLANK	3.4849e-13	9.8952e-15	4.1281e-14	3.0838e-15	1.5696e-13	7.9921e-15	1.9649e-14	2.4299e-15	1.3736e-13	1.3602e-14	2.6328e-12	2.4742e-13
795	2.743e-14	1.4064e-14	1.2732e-13	7.4532e-15	-1.8143e-14	1.1903e-14	7.7385e-13	3.1488e-14	6.6532e-13	2.2921e-14	9.2582e-10	8.465e-11
893	4.1229e-14	1.5106e-14	1.446e-13	1.0152e-14	-3.2148e-14	1.1281e-14	7.5248e-13	2.2333e-14	7.13e-13	2.3889e-14	1.0981e-09	4.6536e-11
939	4.0339e-14	1.7346e-14	7.7108e-14	8.8474e-15	-1.4865e-15	1.1117e-14	6.236e-13	3.1724e-14	4.4501e-13	2.3457e-14	5.8108e-10	3.0057e-11
BLANK	3.6314e-13	6.77e-15	4.7934e-14	3.6527e-15	1.5365e-13	6.9273e-15	-9.5935e-15	6.4576e-15	6.0959e-14	1.036e-14	3.3218e-12	4.7691e-13
980	1.0684e-14	1.2605e-14	9.245e-14	8.109e-15	1.3928e-14	9.8186e-15	1.0001e-12	2.3455e-14	6.2303e-13	2.1364e-14	7.5692e-10	2.9052e-11
1031	1.7432e-14	1.8607e-14	1.7489e-13	9.6516e-15	9.0225e-14	9.721e-15	1.1364e-12	1.7819e-14	1.2645e-12	2.7354e-14	1.7448e-09	1.6806e-10
958	1.4648e-13	1.5886e-14	1.5886e-13	1.2805e-14	7.4814e-13	2.1617e-14	5.8041e-13	1.7636e-14	4.5397e-12	3.738e-14	5.8231e-09	4.7424e-10
1500	-4.5822e-16	1.0519e-14	1.8525e-13	1.1894e-14	6.9911e-13	2.408e-14	4.2751e-13	1.3376e-14	1.6571e-12	3.7723e-14	2.2032e-09	9.7539e-11
TOTAL	4.1117e-13	4.5181e-14	1.113e-12	2.8373e-14	1.6321e-12	2.6751e-12	5.7968e-12	6.4207e-14	1.1541e-11	9.5959e-14	1.4374e-08	5.2447e-10

## Sheet: 0615B8
Bulk chondrules (Y040615B8)
TEMP.(ºC)	CUM39	AGE(Ma)	ERROR	Ca/K	ERROR
503	0.035	1947.88	229.42	13.604	5.928
600	0.128	2416.56	86.87	2.925	1.469
712	0.258	3004.72	48.84	1.923	1.001
804	0.358	2975.76	85.22	0.399	1.526
894	0.44	2465.08	109.61	3.425	1.968
943	0.513	2832.44	129.45	4.857	1.97
997	0.627	2869.33	80.89	4.21	1.48
1019	0.757	2850.12	98.16	9.867	1.559
1066	0.867	2929.85	87.08	10.067	1.228
1300	1	2605.44	116.38	7.655	1.096
TOTAL	-	2772.64	33.22	5.546	0.499
TEMP.	35Ar	ERROR	36Ar	ERROR	37Ar	ERROR	38Ar	ERROR	39Ar	ERROR	40Ar	ERROR
(ºC)	(ccSTP)	(ccSTP)	(ccSTP)	(ccSTP)	(ccSTP)	(ccSTP)	(ccSTP)	(ccSTP)	(ccSTP)	(ccSTP)	(ccSTP)	(ccSTP)
BLANK	3.6087e-13	3.3316e-15	3.1808e-14	3.0074e-15	1.43e-13	4.9816e-15	8.3354e-15	1.2985e-15	8.034e-15	1.1459e-14	2.0611e-12	3.2823e-13
503	-1.9518e-14	1.2143e-14	3.2943e-14	3.7865e-15	2.8665e-14	1.1212e-14	5.1222e-14	4.8997e-15	1.2889e-13	2.2097e-14	7.072e-11	4.7506e-12
600	-3.607e-15	1.3951e-14	5.5326e-14	6.3536e-15	1.6327e-14	8.1269e-15	2.347e-13	1.0332e-14	3.3615e-13	1.6451e-14	2.5109e-10	9.7327e-12
712	6.8817e-15	1.5095e-14	8.3207e-14	4.7689e-15	1.5112e-14	7.8356e-15	8.8252e-13	2.7638e-14	4.7255e-13	1.2669e-14	5.278e-10	9.0955e-12
BLANK	3.389e-13	1.0498e-14	3.9749e-14	2.7491e-15	1.5534e-13	5.2919e-15	-3.7704e-15	6.6672e-15	1.0706e-13	8.508e-15	2.7624e-12	4.6092e-13
804	4.3779e-14	1.6611e-14	1.1291e-13	3.934e-15	2.4008e-15	9.1874e-15	1.496e-12	1.8854e-14	3.6131e-13	1.527e-14	4.1143e-10	1.4941e-11
894	1.9542e-14	1.525e-14	1.1592e-13	6.1555e-15	1.7046e-14	9.6651e-15	1.2807e-12	2.6219e-14	2.9986e-13	2.1511e-14	2.5116e-10	7.8832e-12
943	2.2113e-14	1.2345e-14	1.126e-13	5.6351e-15	2.1358e-14	8.4561e-15	9.3284e-13	2.8668e-14	2.6551e-13	1.9511e-14	2.8303e-10	1.2799e-11
BLANK	3.5705e-13	1.1628e-14	3.9164e-14	2.1129e-15	1.5619e-13	3.9953e-15	-2.3983e-15	1.0028e-14	3.869e-14	1.4164e-14	2.2228e-12	3.9039e-13
997	2.111e-14	1.4684e-14	1.4621e-13	8.1199e-15	2.8878e-14	1.0008e-14	1.2567e-12	2.312e-14	4.1381e-13	1.8509e-14	4.4305e-10	1.2963e-11
1019	1.0042e-14	2.3545e-14	1.9485e-13	9.353e-15	7.6616e-14	1.1348e-14	1.3994e-12	3.544e-14	4.7238e-13	2.2674e-14	5.0393e-10	2.1078e-11
1066	-9.0519e-15	1.4394e-14	1.3445e-13	5.983e-15	6.5769e-14	7.3332e-15	5.3249e-13	1.7628e-14	3.9755e-13	1.7758e-14	4.3667e-10	1.5285e-11
1300	2.2755e-14	1.7489e-14	3.9841e-13	7.4299e-15	6.0984e-14	8.1498e-15	4.2616e-13	1.9163e-14	4.8307e-13	2.2476e-14	5.0237e-10	2.6756e-11
TOTAL	1.4622e-13	5.0139e-14	1.3868e-12	2.0209e-14	3.3315e-13	1.7517e-12	8.4927e-12	7.268e-14	3.6311e-12	6.0691e-14	3.6812e-09	4.7132e-11

## Sheet: 0615B11
Bulk chondrules (Y040615B11)
TEMP.(ºC)	CUM39	AGE(Ma)	ERROR	Ca/K	ERROR
514	0.062	1431.2	198.72	14.271	3.029
601	0.205	1908.73	79.39	5.919	0.968
730	0.272	2384.14	202.79	11.14	1.999
810	0.379	2991.35	85.3	2.621	1.038
897	0.442	2820.02	139.1	6.094	2.001
938	0.476	2939.65	154.79	8.179	2.438
987	0.518	2894.26	112.32	31.199	3.896
1033	0.573	2891.3	179.42	53.513	4.047
1069	0.606	3134.82	146.2	97.913	8.446
1426	0.974	3165.93	104.36	83.745	1.859
1515	1	-749.57	864.54	949.572	182.026
TOTAL	-	2778.66	56.24	51.551	1.169
TEMP.	35Ar	ERROR	36Ar	ERROR	37Ar	ERROR	38Ar	ERROR	39Ar	ERROR	40Ar	ERROR
(ºC)	(ccSTP)	(ccSTP)	(ccSTP)	(ccSTP)	(ccSTP)	(ccSTP)	(ccSTP)	(ccSTP)	(ccSTP)	(ccSTP)	(ccSTP)	(ccSTP)
BLANK	3.5167e-13	8.3704e-15	3.0375e-14	2.3122e-15	1.3971e-13	7.2284e-15	-8.6359e-16	6.4373e-15	2.6537e-14	1.1042e-14	1.9002e-12	3.7928e-13
514	1.2734e-15	1.4372e-14	9.3626e-14	8.0592e-15	9.6492e-14	1.2189e-14	2.3917e-13	1.0374e-14	4.2227e-13	6.9667e-14	1.5176e-10	1.3443e-11
601	2.9808e-14	1.817e-14	1.3028e-13	7.6425e-15	9.3185e-14	1.4039e-14	6.5077e-13	2.5106e-14	9.7121e-13	5.8279e-14	4.8889e-10	1.2721e-11
730	3.852e-14	1.3879e-14	1.5602e-13	8.9671e-15	8.2502e-14	1.0598e-14	1.1847e-12	4.3418e-14	4.6041e-13	5.5741e-14	3.5566e-10	2.8108e-11
BLANK	3.474e-13	1.0906e-14	1.4092e-14	2.2485e-15	1.5883e-13	5.0232e-15	-8.9467e-15	8.6087e-15	7.8719e-14	8.3248e-15	3.3056e-12	1.2696e-13
810	2.2017e-14	1.4889e-14	4.475e-13	1.5805e-14	3.115e-14	1.2255e-14	4.7769e-12	1.8117e-13	7.2957e-13	2.104e-14	9.0098e-10	3.8299e-11
897	2.3518e-14	1.9514e-14	4.3429e-13	1.0541e-14	4.2026e-14	1.3479e-14	3.3477e-12	5.6231e-14	4.2554e-13	2.3406e-14	5.2418e-10	3.1481e-11
938	8.1673e-15	1.5738e-14	2.6015e-13	9.2187e-15	3.0862e-14	8.647e-15	1.993e-12	4.6972e-14	2.3353e-13	2.1161e-14	3.1219e-10	1.2416e-11
BLANK	3.5755e-13	6.6306e-15	5.928e-14	3.1768e-15	1.5846e-13	7.6097e-15	3.1993e-14	3.4884e-15	8.5e-14	6.5162e-15	1.6155e-12	2.2495e-13
987	6.5615e-15	7.8716e-15	5.2045e-13	9.056e-15	1.3963e-13	1.5155e-14	5.5415e-12	7.7316e-14	2.8646e-13	1.4161e-14	4.2355e-10	1.5346e-11
1033	-5.8367e-15	9.3353e-15	4.184e-13	1.1778e-14	3.0041e-13	1.641e-14	3.9935e-12	9.3516e-14	3.7079e-13	1.6153e-14	4.608e-10	3.8805e-11
1069	3.7083e-15	1.2521e-14	2.4816e-13	6.2711e-15	3.1489e-13	1.6421e-14	1.332e-12	5.9844e-14	2.2551e-13	1.2114e-14	3.0085e-10	1.7221e-11
BLANK	3.6693e-13	1.2197e-14	3.316e-14	2.5082e-15	1.4347e-13	7.6477e-15	1.3686e-14	2.7321e-15	6.1719e-14	2.0515e-15	3.723e-12	3.026e-13
1426	9.1858e-14	2.2119e-14	1.6057e-12	2.604e-14	3.0485e-12	2.9184e-14	7.0465e-12	4.9364e-14	2.5053e-12	4.0094e-14	3.1084e-09	1.7702e-10
1515	-1.4024e-14	1.7241e-14	2.6381e-13	6.3464e-15	1.1499e-12	1.4836e-14	3.7192e-13	7.1057e-15	1.7947e-13	1.279e-14	6.5179e-11	5.3762e-12
TOTAL	2.2543e-13	5.169e-14	4.5784e-12	4.0536e-14	5.3296e-12	3.1788e-12	3.0478e-11	2.4959e-13	6.8101e-12	1.2332e-13	7.0924e-09	1.9282e-10
